# Supplementary material
Source: PubMed Central journal article supplement (PMC5491693)
Supplement: NIHMS863394-supplement-Supplement.pdf [file NIHMS863394-supplement-Supplement.pdf]

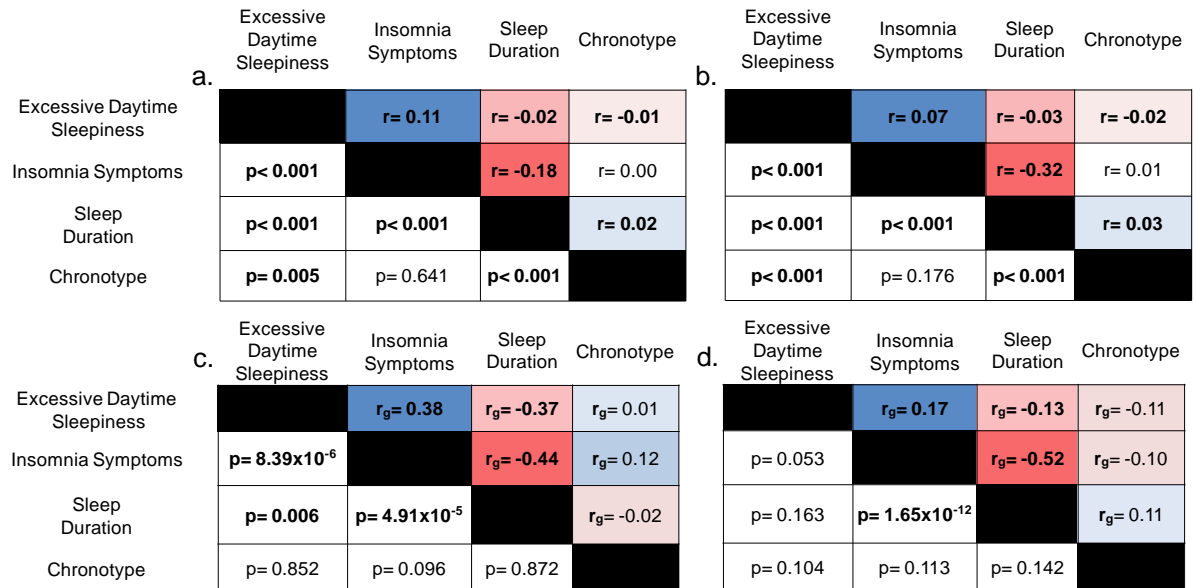

**Supplementary Figure 1. Sleep traits are phenotypically and genetically correlated in men and women.** Phenotypic correlation between the reported sleep traits, using Spearman correlation are shown stratified by sex (a. men, b. women). Color scale represents the strength of the correlation. Genetic correlation between the reported sleep traits shown stratified by sex, as measured by LDSC (c. men, d. women). Color scale represents the strength of the correlation. Blue indicates positive correlation, red indicates negative correlation.

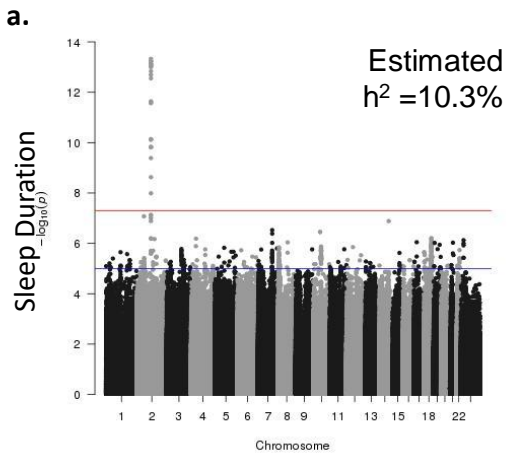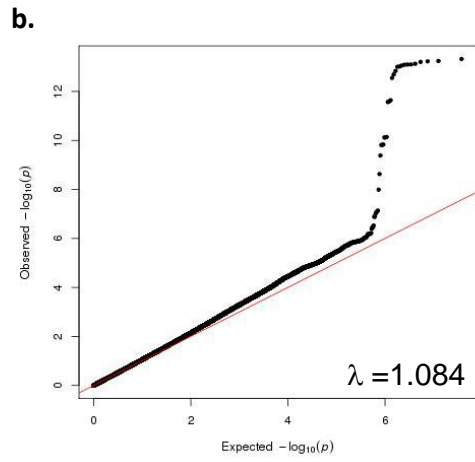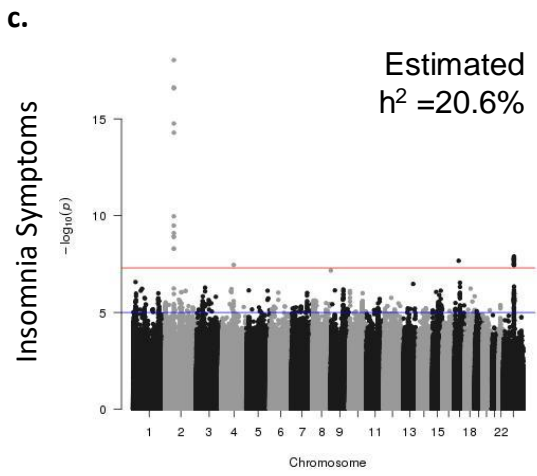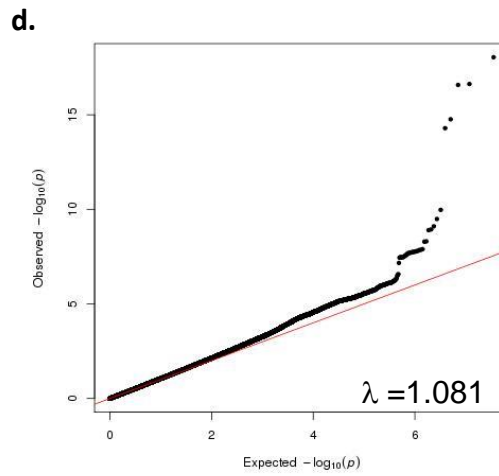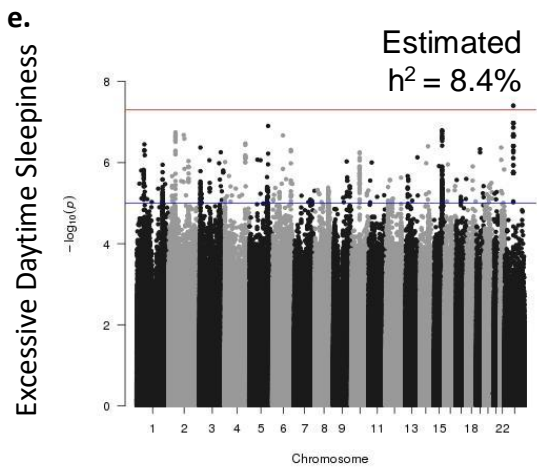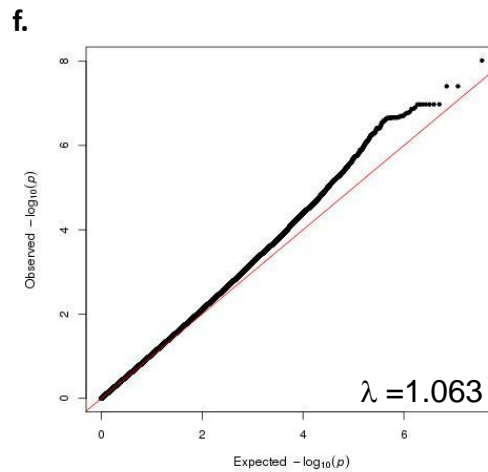

**Supplementary Figure 2. Manhattan and Q-Q plots for genome-wide association analysis of sleep duration, insomnia symptoms, and excessive daytime sleepiness.** GWAS results for sleep duration (a-b), insomnia symptoms (c-d), and excessive daytime sleepiness (e-f). Manhattan plots a, c, and e show the  $-\log_{10} p$ -values (y-axis) for all genotyped and imputed SNPs passing quality control in each GWAS, plotted by chromosome (x-axis). Red line is genome-wide significant ( $5 \times 10^{-8}$ ) and blue line is  $1 \times 10^{-6}$ . Q-Q plots b, d, and f show the expected versus observed  $p$ -values from our association analysis. Heritability estimates were calculated using BOLT-REML and lambda inflation values using GenABEL in R.

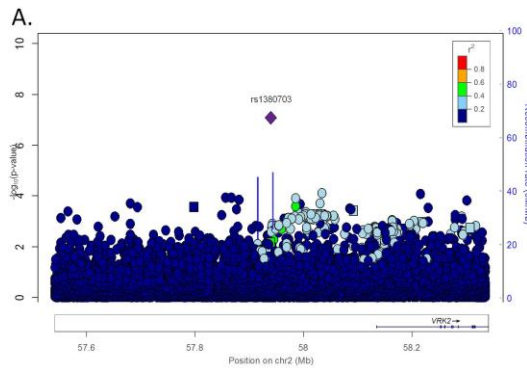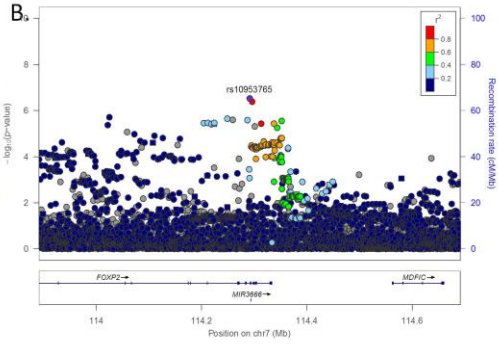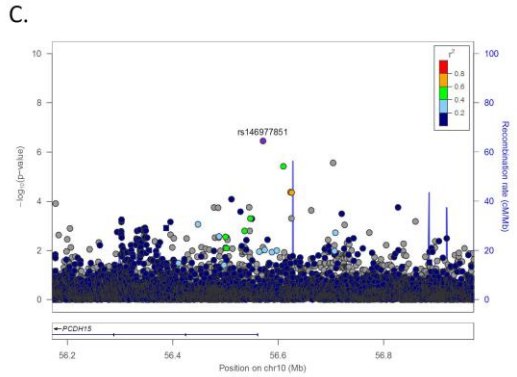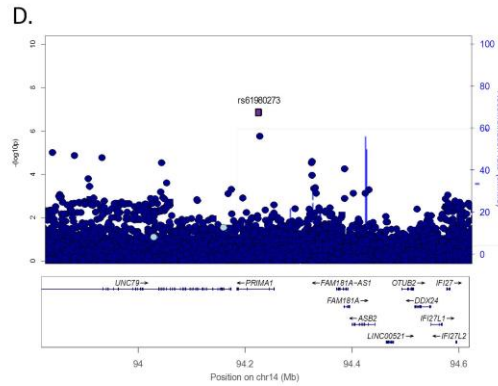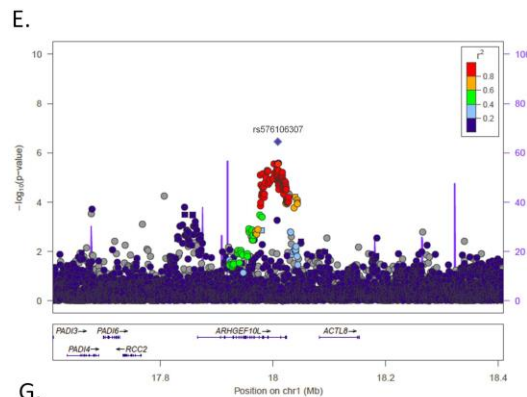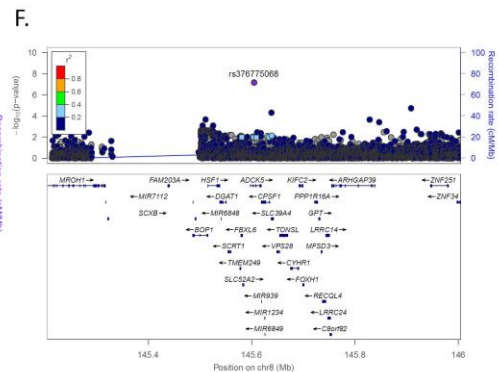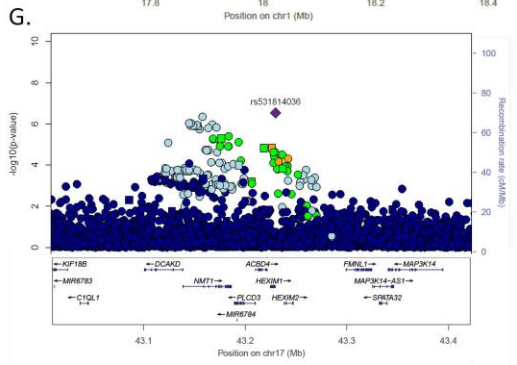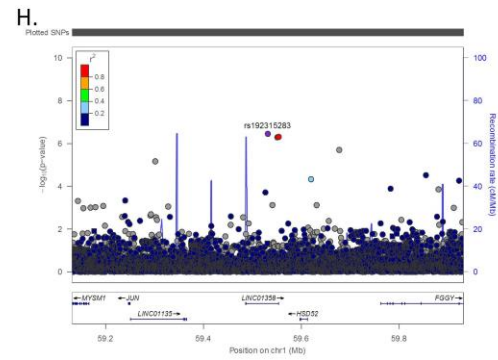

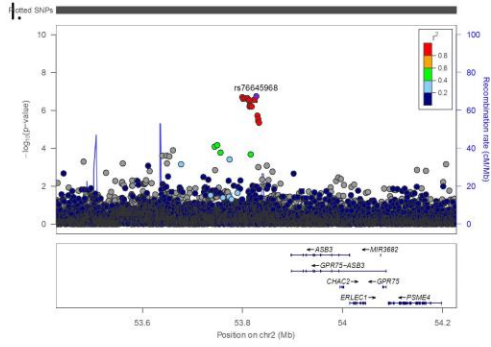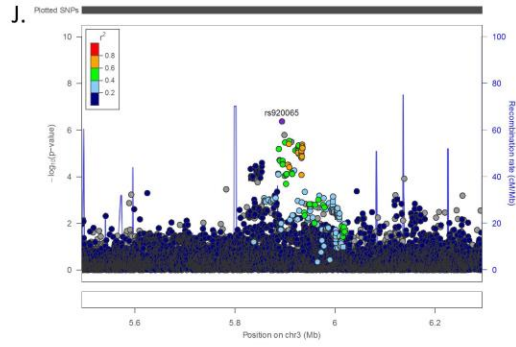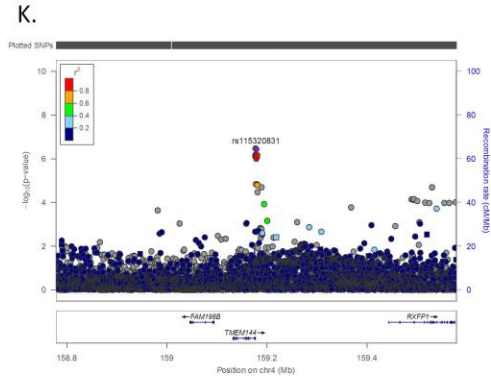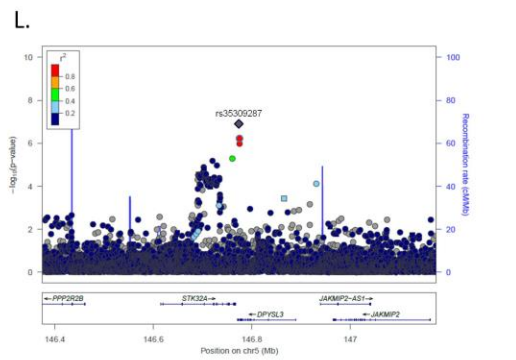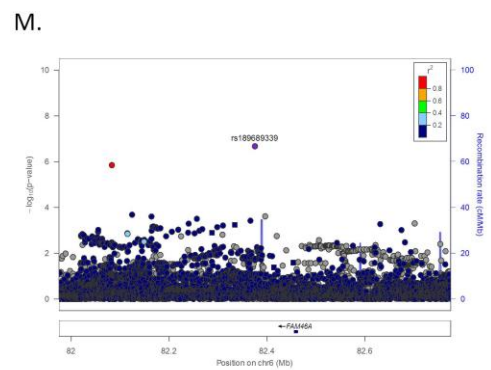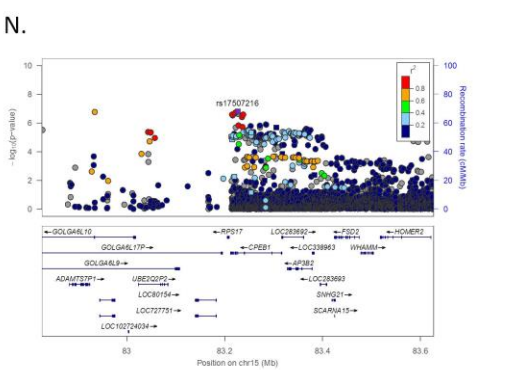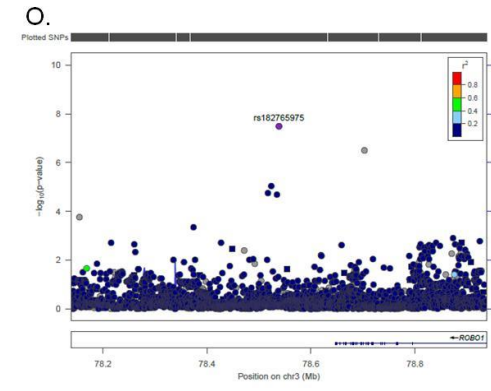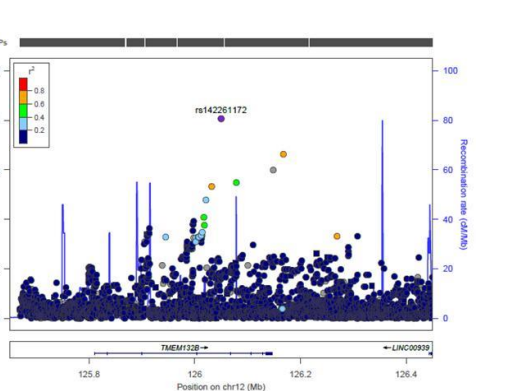

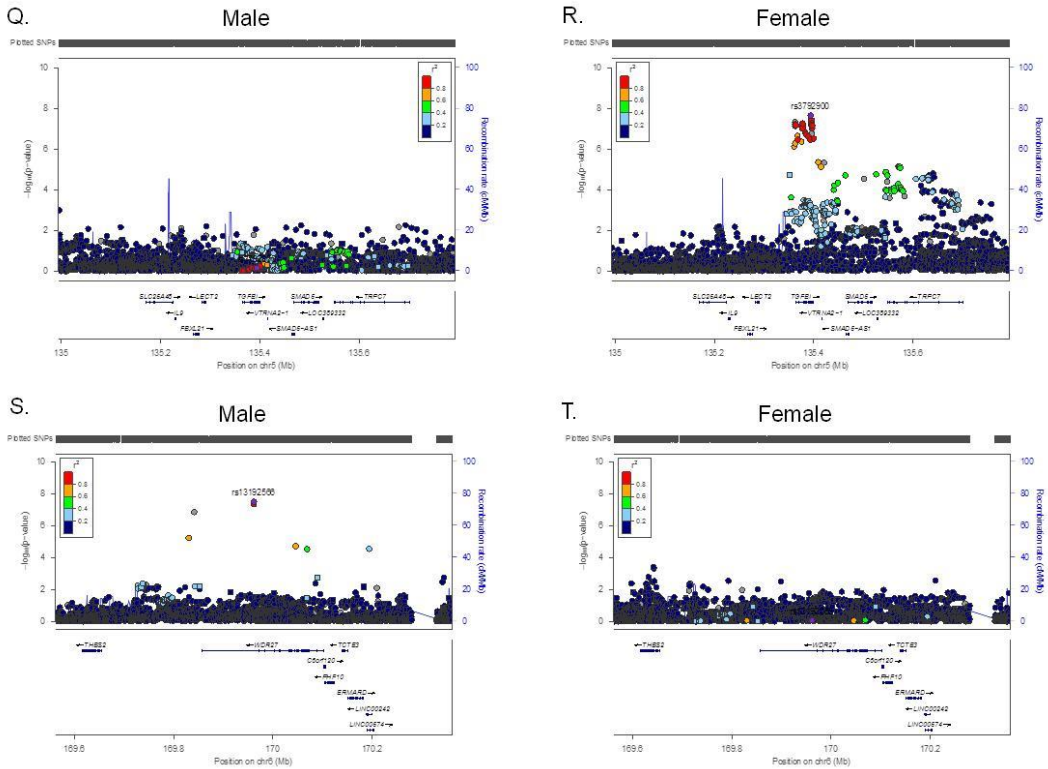

**Supplementary Figure 3. Regional association plots for genome-wide significant and suggestive loci.** Panel a-d sleep duration, e-g insomnia symptoms, h-n excessive daytime sleepiness, o excessive daytime sleepiness adjusted for depression, p excessive daytime sleepiness adjusted for BMI, q-t sex specific loci for insomnia symptoms. Chromosomal position is indicated on the x-axis and  $-\log_{10} p$ -values for each SNP (filled circles and squares) is indicated on the y-axis, with the lead SNP shown in purple (400kb window around lead SNP shown). Genes within the region are shown in the lower panel. The blue line indicates the recombination rate. Additional SNPs in the locus are colored according to linkage disequilibrium ( $r^2$ ) with the lead SNP (estimated by LocusZoom based on the CEU HapMap haplotypes). Squares represent genotyped SNPs and circles represent imputed SNPs.

Sleep Duration

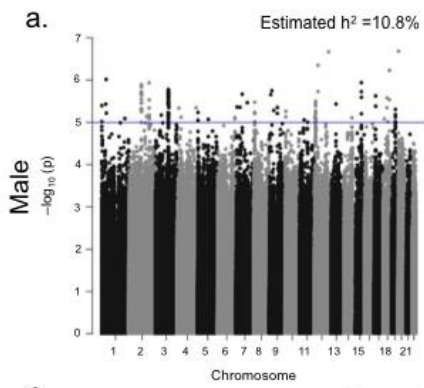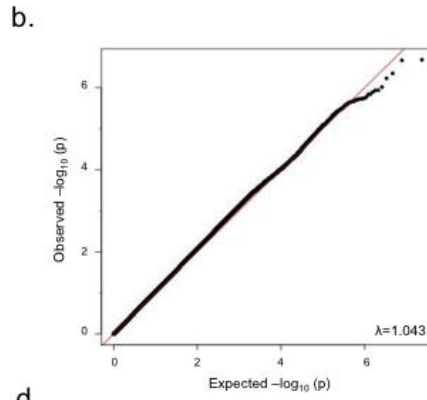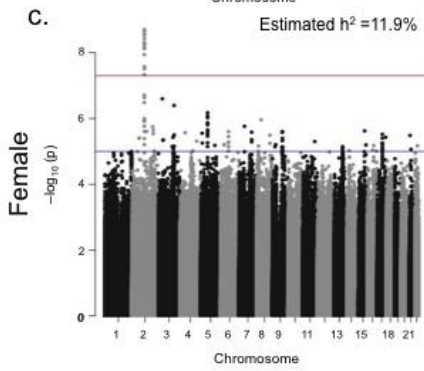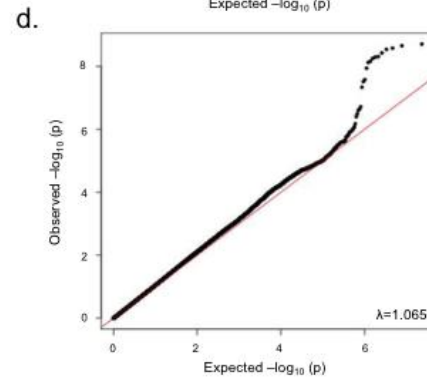

Insomnia Symptoms

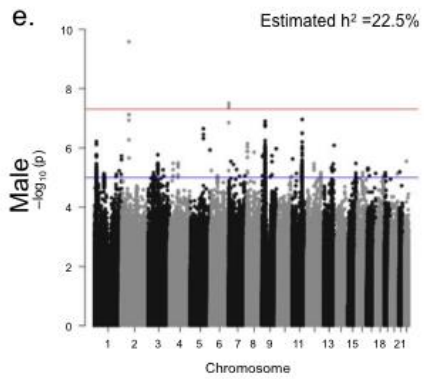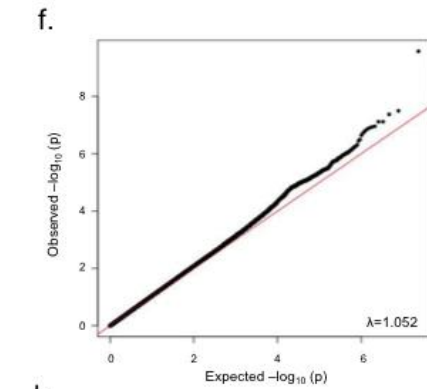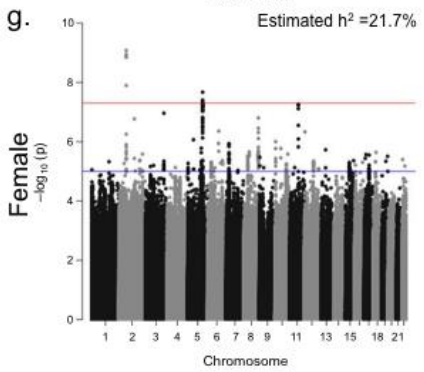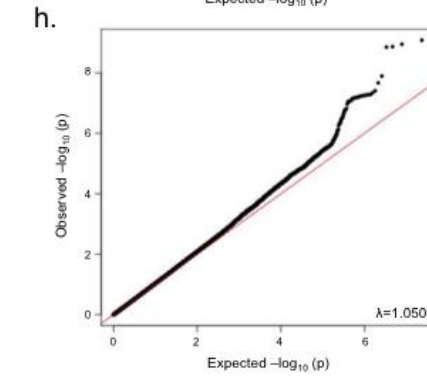

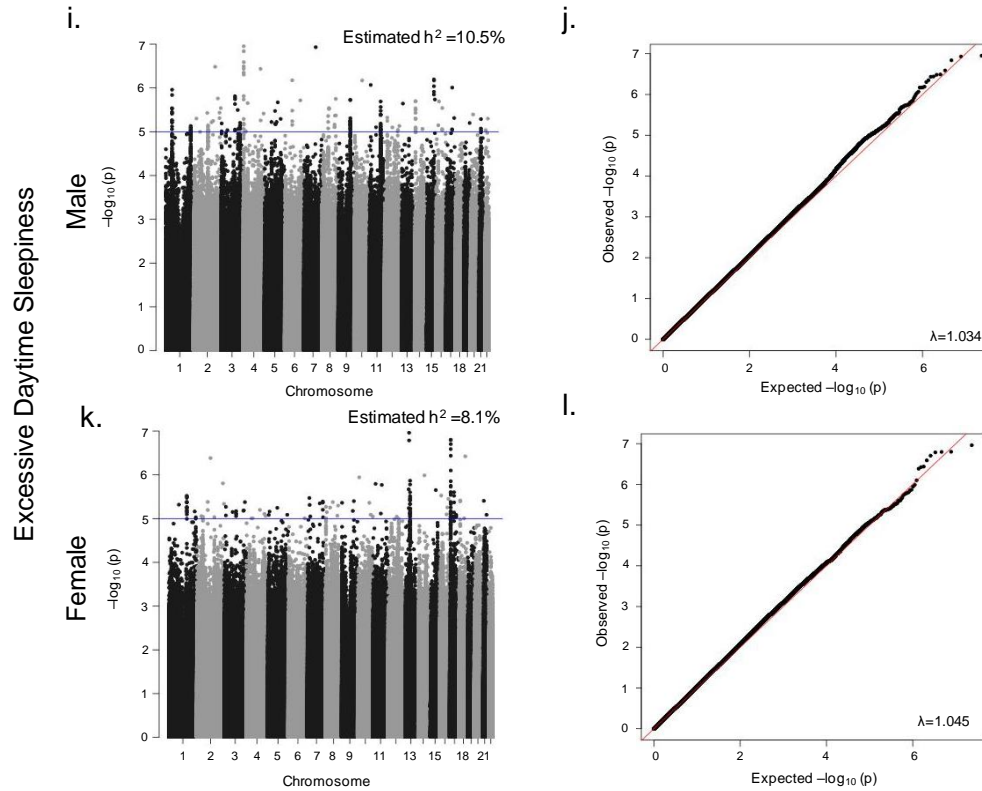

**Supplementary Figure 4. Manhattan and QQ plot for sex stratified genome-wide association analysis of sleep duration (a-d), sleep disruption (e-h), and daytime sleepiness (i-l).** Manhattan plots a,c,e,g,i, and k show the  $-\log_{10} p$ -values (y-axis) for all genotyped and imputed SNPs passing quality control in each GWAS, plotted by chromosome (x-axis). Red line is genome-wide significant ( $5 \times 10^{-8}$ ) and blue line is  $1 \times 10^{-6}$ . Plots b,d,f,h,j, and l show the expected versus observed P values from our association analysis. Heritability estimates were calculated using BOLT-REML and lambda inflation values using GenABEL in R.



### A. Sleep Duration: chr2: rs62158211 (*PAX-8* region)

Query SNP: **rs62158211** and variants with  $r^2 \geq 0.8$

| chr pos (hg38) | LD (r <sup>2</sup> ) | LD (D) | variant    | Ref Alt | AFR freq | AMR freq | ASN freq | EUR freq | GERP cons | SiPhy cons | Promoter histone marks | Enhancer histone marks | DNAse      | Proteins bound | Motifs changed    | NHGR/EBI GWAS hits | GRASP QTL hits | Selected eQTL hits | RefSeq genes     | dbSNP func annot |  |
|----------------|----------------------|--------|------------|---------|----------|----------|----------|----------|-----------|------------|------------------------|------------------------|------------|----------------|-------------------|--------------------|----------------|--------------------|------------------|------------------|--|
| 2 113319641    | 0.82                 | 0.94   | rs62158156 | G C     | 0.12     | 0.18     | 0.15     | 0.22     |           |            |                        |                        |            |                | ir,VDR            |                    |                | 5 hits             | 41kb 5' of PAX8  |                  |  |
| 2 113320904    | 0.8                  | 0.91   | rs62158156 | C G     | 0.11     | 0.18     | 0.15     | 0.22     |           |            |                        |                        |            |                | 11 altered motifs |                    |                | 5 hits             | 42kb 5' of PAX8  |                  |  |
| 2 113321671    | 0.84                 | 0.95   | rs12616641 | C A     | 0.11     | 0.18     | 0.15     | 0.22     |           |            |                        |                        |            |                |                   |                    |                | 5 hits             | 43kb 5' of PAX8  |                  |  |
| 2 113324250    | 0.88                 | 0.95   | rs62158169 | C T     | 0.15     | 0.16     | 0.16     | 0.21     |           |            | 7 tissues              | 16 tissues             | 14 tissues |                | BCL2L1, Pax-6     |                    |                | 7 hits             | 45kb 5' of PAX8  |                  |  |
| 2 113324598    | 0.89                 | 0.95   | rs62158170 | A G     | 0.12     | 0.16     | 0.15     | 0.21     |           |            | 19 tissues             | 16 tissues             | 6 tissues  | ZNF263         | GRLF-A1           |                    |                | 7 hits             | 46kb 5' of PAX8  |                  |  |
| 2 113325543    | 0.92                 | 0.98   | rs6737318  | A G     | 0.13     | 0.16     | 0.16     | 0.22     |           |            | 16 tissues             | 12 tissues             | 6 tissues  | POL2, AP2GAMMA | BDP1, Pax-3, TBX5 |                    |                | 7 hits             | 47kb 5' of PAX8  |                  |  |
| 2 113327019    | 0.92                 | 0.98   | rs62158206 | T C     | 0.13     | 0.16     | 0.20     | 0.22     |           |            | SKIN                   |                        |            |                | Evi-1             |                    |                | 7 hits             | 48kb 5' of PAX8  |                  |  |
| 2 113328208    | 0.92                 | 0.98   | rs7556815  | G A     | 0.13     | 0.16     | 0.20     | 0.22     |           |            | MUS, LNG               | 6 tissues              | LNG        | GR             | Nkx2, Nkx3        |                    |                | 7 hits             | 49kb 5' of PAX8  |                  |  |
| 2 113331974    | 0.94                 | 0.98   | rs2863957  | C A     | 0.12     | 0.16     | 0.20     | 0.22     |           |            |                        |                        |            |                | Hic1              |                    |                | 7 hits             | 53kb 5' of PAX8  |                  |  |
| 2 113332835    | 0.95                 | 0.98   | rs1823125  | A G     | 0.12     | 0.16     | 0.20     | 0.22     |           |            |                        |                        |            |                | FAT, ADRL         |                    |                | 7 hits             | 54kb 5' of PAX8  |                  |  |
| 2 113334972    | 0.95                 | 0.98   | rs60873293 | G T     | 0.12     | 0.16     | 0.20     | 0.21     |           |            |                        |                        |            |                | FAT               |                    |                | 7 hits             | 56kb 5' of PAX8  |                  |  |
| 2 113346389    | 1                    | 1      | rs56093896 | C A     | 0.07     | 0.12     | 0.14     | 0.21     |           |            |                        |                        |            |                |                   |                    |                |                    | 5 hits           | 67kb 5' of PAX8  |  |
| 2 113348562    | 1                    | 1      | rs62158211 | G T     | 0.07     | 0.12     | 0.14     | 0.21     |           |            |                        |                        |            |                | BRST, BLD         | BRST               |                |                    | 5 hits           | 70kb 5' of PAX8  |  |
| 2 113351778    | 1                    | 1      | rs4618068  | C T     | 0.08     | 0.12     | 0.14     | 0.21     |           |            |                        |                        |            |                |                   |                    |                |                    | 7 altered motifs | 73kb 5' of PAX8  |  |
| 2 113352459    | 1                    | 1      | rs1807282  | A T     | 0.05     | 0.12     | 0.14     | 0.21     |           |            |                        |                        |            |                |                   |                    |                |                    | 7 altered motifs | 74kb 5' of PAX8  |  |
| 2 113352991    | 1                    | 1      | rs62158213 | G A     | 0.05     | 0.12     | 0.14     | 0.21     |           |            |                        |                        |            |                |                   |                    |                |                    | 3 hits           | 74kb 5' of PAX8  |  |

### B. Sleep Duration: chr2: rs1380703 (*VRK2* region)

Query SNP: **rs1380703** and variants with  $r^2 \geq 0.8$

| chr pos (hg38) | LD (r <sup>2</sup> ) | LD (D) | variant   | Ref Alt | AFR freq | AMR freq | ASN freq | EUR freq | GERP cons | SiPhy cons | Promoter histone marks | Enhancer histone marks | DNAse | Proteins bound | Motifs changed             | NHGR/EBI GWAS hits | GRASP QTL hits | Selected eQTL hits | RefSeq genes     | dbSNP func annot |
|----------------|----------------------|--------|-----------|---------|----------|----------|----------|----------|-----------|------------|------------------------|------------------------|-------|----------------|----------------------------|--------------------|----------------|--------------------|------------------|------------------|
| 2 5771452      | 1                    | 1      | rs1380703 | A G     | 0.11     | 0.32     | 0.53     | 0.39     |           |            |                        |                        |       |                | Foxp3, Nanog, Pou2f2, TATA |                    |                |                    | 332kb 5' of VRK2 |                  |

### C. Sleep Duration: chr7: rs10953765 (*FOXP2* region)

Query SNP: **rs10953765** and variants with  $r^2 \geq 0.8$

| chr pos (hg38) | LD (r <sup>2</sup> ) | LD (D) | variant    | Ref Alt | AFR freq | AMR freq | ASN freq | EUR freq | GERP cons | SiPhy cons | Promoter histone marks | Enhancer histone marks | DNAse | Proteins bound | Motifs changed    | NHGR/EBI GWAS hits | GRASP QTL hits | Selected eQTL hits | RefSeq genes | dbSNP func annot |
|----------------|----------------------|--------|------------|---------|----------|----------|----------|----------|-----------|------------|------------------------|------------------------|-------|----------------|-------------------|--------------------|----------------|--------------------|--------------|------------------|
| 7 114651380    | 1                    | 1      | rs10953765 | G A     | 0.32     | 0.37     | 0.51     | 0.49     |           |            |                        |                        |       |                | Dbx1, Foxo1, TATA |                    |                |                    | FOXP2        | intronic         |
| 7 114656047    | 0.98                 | 1      | rs1456031  | T C     | 0.26     | 0.37     | 0.51     | 0.50     |           |            |                        | GI                     |       |                | Zfp128, Zfp161    |                    |                |                    | FOXP2        | intronic         |
| 7 114673163    | 0.84                 | 1      | rs10953766 | A G     | 0.77     | 0.49     | 0.50     | 0.54     |           |            |                        |                        |       |                |                   |                    |                |                    | FOXP2        | intronic         |

### D. Sleep Duration: chr10: rs146977851 (*PCDH15* region)

Query SNP: **rs146977851** and variants with  $r^2 \geq 0.8$

| chr pos (hg38) | LD (r <sup>2</sup> ) | LD (D) | variant     | Ref Alt | AFR freq | AMR freq | ASN freq | EUR freq | GERP cons | SiPhy cons | Promoter histone marks | Enhancer histone marks | DNAse | Proteins bound | Motifs changed                                                            | NHGR/EBI GWAS hits | GRASP QTL hits | Selected eQTL hits | RefSeq genes       | dbSNP func annot |
|----------------|----------------------|--------|-------------|---------|----------|----------|----------|----------|-----------|------------|------------------------|------------------------|-------|----------------|---------------------------------------------------------------------------|--------------------|----------------|--------------------|--------------------|------------------|
| 10 54811194    | 1                    | 1      | rs146977851 | C T     | 0.01     | 0.03     | 0.00     | 0.04     |           |            |                        |                        |       |                | Foxd3, Foxt1, Foxt2, Foxl1, Foxl1, Foxl1, Foxo, Foxp1, Foxq1, Pou3f2, Sox |                    |                |                    | 9.9kb 5' of PCDH15 |                  |
| 10 54865579    | 0.87                 | 1      | rs75334053  | G A     | 0.08     | 0.04     | 0.00     | 0.04     |           |            |                        |                        |       |                | Zic, Znf143                                                               |                    |                |                    | 64kb 5' of PCDH15  |                  |

### E. Sleep Duration: chr 14: rs61980273 (*PRIMA1* region)

Query SNP: **rs61980273** and variants with  $r^2 \geq 0.8$

| chr pos (hg38) | LD (r <sup>2</sup> ) | LD (D) | variant    | Ref Alt | AFR freq | AMR freq | ASN freq | EUR freq | GERP cons | SiPhy cons | Promoter histone marks | Enhancer histone marks       | DNAse | Proteins bound | Motifs changed  | NHGR/EBI GWAS hits | GRASP QTL hits | Selected eQTL hits | RefSeq genes | dbSNP func annot |
|----------------|----------------------|--------|------------|---------|----------|----------|----------|----------|-----------|------------|------------------------|------------------------------|-------|----------------|-----------------|--------------------|----------------|--------------------|--------------|------------------|
| 14 93752603    | 1                    | 1      | rs61980273 | G A     | 0.00     | 0.02     | 0.00     | 0.04     |           |            | ESDH                   | BRST1, BRN, G, HRT, MUS, LIV | PLCNT |                | AP-2, BDP1, Zfx |                    |                |                    | PRIMA1       | intronic         |

### F. Insomnia Symptoms: chr 2: (*MEIS1* region; variants with $r^2 > 0.6$ shown)

Query SNP: **rs113851554** and variants with  $r^2 \geq 0.6$

| chr pos (hg38) | LD (r <sup>2</sup> ) | LD (D) | variant     | Ref Alt | AFR freq | AMR freq | ASN freq | EUR freq | GERP cons | SiPhy cons | Promoter histone marks | Enhancer histone marks | DNAse      | Proteins bound | Motifs changed    | NHGR/EBI GWAS hits | GRASP QTL hits | Selected eQTL hits | RefSeq genes     | dbSNP func annot |
|----------------|----------------------|--------|-------------|---------|----------|----------|----------|----------|-----------|------------|------------------------|------------------------|------------|----------------|-------------------|--------------------|----------------|--------------------|------------------|------------------|
| 2 66523432     | 1                    | 1      | rs113851554 | G T     | 0.00     | 0.04     | 0.00     | 0.05     |           |            |                        | 5 tissues              |            |                |                   |                    |                |                    | MEIS1            | intronic         |
| 2 66530577     | 0.84                 | 1      | rs182588061 | G T     | 0.00     | 0.03     | 0.00     | 0.04     |           |            |                        | BLD, GI, ADRL, HRT     |            |                | CACD, NR5F        |                    |                |                    | MEIS1            | intronic         |
| 2 66555300     | 0.74                 | 0.89   | rs139775539 | AC A    | 0.00     | 0.03     | 0.00     | 0.05     |           |            | 12 tissues             | 10 tissues             | 21 tissues |                | 12 altered motifs |                    |                |                    | MEIS1            | intronic         |
| 2 66558048     | 0.72                 | 0.88   | rs11679120  | G A     | 0.00     | 0.02     | 0.00     | 0.05     |           |            |                        | LNG                    |            |                | 7 altered motifs  |                    |                |                    | MEIS1            | intronic         |
| 2 66572854     | 0.69                 | 0.9    | rs11693221  | C T     | 0.01     | 0.03     | 0.00     | 0.04     |           |            |                        | 9 tissues              |            |                | CDP, SRF          |                    |                |                    | 94bp 3' of MEIS1 |                  |

### G. Insomnia Symptoms: chr 17: rs145258459 (*TMEM132E* region)

Query SNP: **rs145258459** and variants with  $r^2 \geq 0.8$

| chr pos (hg38) | LD (r <sup>2</sup> ) | LD (D) | variant     | Ref Alt | AFR freq | AMR freq | ASN freq | EUR freq | GERP cons | SiPhy cons | Promoter histone marks | Enhancer histone marks | DNAse         | Proteins bound | Motifs changed | NHGR/EBI GWAS hits | GRASP QTL hits | Selected eQTL hits | RefSeq genes        | dbSNP func annot |
|----------------|----------------------|--------|-------------|---------|----------|----------|----------|----------|-----------|------------|------------------------|------------------------|---------------|----------------|----------------|--------------------|----------------|--------------------|---------------------|------------------|
| 17 34659136    | 1                    | 1      | rs145258459 | C T     | 0.00     | 0.01     | 0.00     | 0.02     |           |            |                        | BRN, GI                | IPSC, BRN, GI |                |                |                    |                |                    | 20kb 3' of TMEM132E |                  |

## H. Insomnia Symptoms: chr X: *rs5922858* (*CYCL1* region)

Query SNP: *rs5922858* and variants with  $r^2 \geq 0.8$

| chr | pos (hg38) | LD (r <sup>2</sup> ) | LD (D') | variant          | Ref | Alt | AFR freq | AMR freq | ASN freq | EUR freq | SIPhy cons | Promoter histone marks | Enhancer histone marks | DNase | Proteins bound | Motifs changed | NHGR/EBI GWAS hits | GRASP QTL hits | Selected eQTL hits | GENCODE genes            | dbSNP func annot |
|-----|------------|----------------------|---------|------------------|-----|-----|----------|----------|----------|----------|------------|------------------------|------------------------|-------|----------------|----------------|--------------------|----------------|--------------------|--------------------------|------------------|
| X   | 83716000   | 1                    | 1       | <i>rs5922858</i> | G   | T   | 0.19     | 0.16     | 0.29     | 0.17     |            |                        |                        |       |                |                |                    |                |                    | 145kb 5' of <i>CYCL1</i> |                  |

## I. Insomnia Symptoms: chr 5: *rs3792900* (*TGFBI* region: females only)

Query SNP: *rs3792900* and variants with  $r^2 \geq 0.8$

| chr | pos (hg38) | LD (r <sup>2</sup> ) | LD (D') | variant            | Ref | Alt | AFR freq | AMR freq | ASN freq | EUR freq | SIPhy cons | Promoter histone marks | Enhancer histone marks | DNase      | Proteins bound    | Motifs changed          | NHGR/EBI GWAS hits | GRASP QTL hits | Selected eQTL hits | GENCODE genes            | dbSNP func annot         |  |
|-----|------------|----------------------|---------|--------------------|-----|-----|----------|----------|----------|----------|------------|------------------------|------------------------|------------|-------------------|-------------------------|--------------------|----------------|--------------------|--------------------------|--------------------------|--|
| 5   | 136026861  | 0.83                 | 0.95    | <i>rs34098140</i>  | T   | C   | 0.88     | 0.56     | 0.60     | 0.48     |            |                        | 10 tissues             |            |                   |                         |                    |                |                    | 2kb 5' of <i>TGFBI</i>   |                          |  |
| 5   | 136026993  | 0.83                 | 0.95    | <i>rs10463536</i>  | T   | C   | 0.74     | 0.54     | 0.60     | 0.48     |            |                        |                        |            |                   |                         |                    |                |                    | 1.9kb 5' of <i>TGFBI</i> |                          |  |
| 5   | 136028186  | 0.83                 | 0.95    | <i>rs2282790</i>   | A   | G   | 0.88     | 0.56     | 0.60     | 0.48     |            | IPSC, LNG              | 13 tissues             | 4 tissues  |                   | 11 altered motifs       |                    | 1 hit          | 2 hits             | 708bp 5' of <i>TGFBI</i> |                          |  |
| 5   | 136039784  | 0.86                 | 0.96    | <i>rs4141306</i>   | A   | G   | 0.71     | 0.48     | 0.58     | 0.48     |            |                        | 7 tissues              | SKIN, LNG  |                   | Smad                    |                    | 1 hit          | 2 hits             | <i>TGFBI</i>             | intronic                 |  |
| 5   | 136041660  | 0.88                 | 0.96    | <i>rs2107331</i>   | C   | A   | 0.66     | 0.46     | 0.58     | 0.47     |            |                        | 13 tissues             | LNG        |                   | Cphx, Pax-8, RFX5       |                    | 3 hits         | 2 hits             | <i>TGFBI</i>             | intronic                 |  |
| 5   | 136041877  | 0.88                 | 0.96    | <i>rs7719624</i>   | C   | T   | 0.66     | 0.46     | 0.58     | 0.47     |            |                        | 12 tissues             | SKIN       |                   | Egr-1, Osf2, RREB-1     | 1 hit              | 1 hit          | 2 hits             | <i>TGFBI</i>             | intronic                 |  |
| 5   | 136042041  | 0.88                 | 0.96    | <i>rs2282791</i>   | T   | G   | 0.59     | 0.47     | 0.52     | 0.47     |            |                        | 12 tissues             |            |                   | NRSF                    |                    | 3 hits         | 2 hits             | <i>TGFBI</i>             | intronic                 |  |
| 5   | 136042113  | 0.88                 | 0.96    | <i>rs1989972</i>   | A   | C   | 0.72     | 0.49     | 0.58     | 0.47     |            |                        | 11 tissues             |            |                   | 4 altered motifs        |                    | 2 hits         | 2 hits             | <i>TGFBI</i>             | intronic                 |  |
| 5   | 136047300  | 0.81                 | -1      | <i>rs1442</i>      | G   | C   | 0.04     | 0.43     | 0.37     | 0.49     |            |                        | 7 tissues              |            |                   | NRSF, PPAR, PU.1        |                    | 5 hits         | 2 hits             | <i>TGFBI</i>             | synonymous               |  |
| 5   | 136048754  | 0.88                 | -0.96   | <i>rs916951</i>    | A   | G   | 0.06     | 0.46     | 0.42     | 0.53     |            |                        | 9 tissues              |            |                   | 5 altered motifs        |                    |                |                    | <i>TGFBI</i>             | intronic                 |  |
| 5   | 136053744  | 0.88                 | -0.97   | <i>rs13159365</i>  | C   | T   | 0.06     | 0.46     | 0.42     | 0.53     |            | FAT, CRVX, LIV         | 18 tissues             | 26 tissues | 31 bound proteins | 9 altered motifs        |                    |                |                    | <i>TGFBI</i>             | intronic                 |  |
| 5   | 136057449  | 0.89                 | -0.97   | <i>rs17689879</i>  | C   | T   | 0.06     | 0.46     | 0.42     | 0.53     |            |                        | 19 tissues             | 7 tissues  |                   |                         |                    | 3 hits         | 2 hits             | <i>TGFBI</i>             | intronic                 |  |
| 5   | 136058065  | 1                    | 1       | <i>rs3792900</i>   | T   | C   | 0.89     | 0.51     | 0.57     | 0.46     |            | GI, CRVX, LIV          | 19 tissues             | 10 tissues | CTCF              | E2A, TBX5, ZEB1         |                    | 2 hits         | 3 hits             | <i>TGFBI</i>             | intronic                 |  |
| 5   | 136059514  | 0.98                 | 0.99    | <i>rs1990201</i>   | T   | C   | 0.88     | 0.53     | 0.57     | 0.46     |            |                        | 12 tissues             | MUS        |                   | ATF3, GATA, Myc         |                    | 2 hits         | 3 hits             | <i>TGFBI</i>             | intronic                 |  |
| 5   | 136059744  | 0.98                 | 0.99    | <i>rs8893691</i>   | A   | G   | 0.88     | 0.53     | 0.57     | 0.46     |            |                        | 11 tissues             |            |                   | 7 altered motifs        |                    |                |                    | <i>TGFBI</i>             | intronic                 |  |
| 5   | 136059854  | 0.98                 | 0.99    | <i>rs1990199</i>   | G   | C   | 0.88     | 0.53     | 0.57     | 0.46     |            |                        | 11 tissues             |            |                   | CHD2, RBP, Jkappa, SMC3 |                    | 3 hits         |                    | <i>TGFBI</i>             | intronic                 |  |
| 5   | 136060133  | 0.8                  | 0.99    | <i>rs201910653</i> | AT  | A   | 0.67     | 0.45     | 0.51     | 0.41     |            |                        | 9 tissues              |            |                   | 10 altered motifs       |                    |                |                    | <i>TGFBI</i>             | intronic                 |  |
| 5   | 136060175  | 0.98                 | 0.99    | <i>rs6894815</i>   | G   | C   | 0.78     | 0.51     | 0.57     | 0.46     |            |                        | 9 tissues              |            |                   | 5 altered motifs        |                    | 2 hits         | 3 hits             | <i>TGFBI</i>             | intronic                 |  |
| 5   | 136060395  | 0.98                 | 0.99    | <i>rs10042825</i>  | A   | T   | 0.76     | 0.51     | 0.57     | 0.46     |            |                        |                        | LNG, SKIN  |                   |                         |                    | 2 hits         | 3 hits             | <i>TGFBI</i>             | intronic                 |  |
| 5   | 136060603  | 0.98                 | 0.99    | <i>rs10064478</i>  | T   | G   | 0.76     | 0.51     | 0.57     | 0.46     |            |                        |                        |            |                   | BDP1, Brachyury, LUN-1  |                    |                |                    | <i>TGFBI</i>             | intronic                 |  |
| 5   | 136060763  | 0.9                  | 1       | <i>rs13168806</i>  | A   | G   | 0.76     | 0.53     | 0.61     | 0.49     |            |                        | LNG                    |            |                   | 5 altered motifs        |                    | 3 hits         |                    | <i>TGFBI</i>             | intronic                 |  |
| 5   | 136060779  | 0.9                  | 1       | <i>rs13188659</i>  | T   | A   | 0.76     | 0.53     | 0.61     | 0.49     |            |                        | LNG                    |            |                   | 22 altered motifs       |                    |                |                    | <i>TGFBI</i>             | intronic                 |  |
| 5   | 136060980  | 0.9                  | 0.99    | <i>rs8880837</i>   | T   | C   | 0.76     | 0.53     | 0.60     | 0.48     |            |                        | GI, LNG                |            |                   | 4 altered motifs        |                    | 1 hit          | 3 hits             | <i>TGFBI</i>             | intronic                 |  |
| 5   | 136061329  | 0.9                  | 1       | <i>rs2302038</i>   | T   | C   | 0.87     | 0.55     | 0.61     | 0.49     |            |                        | LNG                    |            |                   | SRF                     |                    | 3 hits         | 3 hits             | <i>TGFBI</i>             | intronic                 |  |
| 5   | 136064346  | 0.82                 | -1      | <i>rs13189180</i>  | A   | G   | 0.19     | 0.42     | 0.39     | 0.49     |            |                        | 4 tissues              | ESDR       | USF1              | lrf                     |                    |                | 4 hits             |                          | 527bp 3' of <i>TGFBI</i> |  |

## J. Insomnia Symptoms: chr 5: *rs13192566* (*WDR27* region: males only)

Query SNP: *rs13192566* and variants with  $r^2 \geq 0.8$

| chr | pos (hg38) | LD (r <sup>2</sup> ) | LD (D') | variant           | Ref | Alt | AFR freq | AMR freq | ASN freq | EUR freq | SIPhy cons | Promoter histone marks | Enhancer histone marks | DNase | Proteins bound | Motifs changed                                        | NHGR/EBI GWAS hits | GRASP QTL hits | Selected eQTL hits | GENCODE genes | dbSNP func annot |          |
|-----|------------|----------------------|---------|-------------------|-----|-----|----------|----------|----------|----------|------------|------------------------|------------------------|-------|----------------|-------------------------------------------------------|--------------------|----------------|--------------------|---------------|------------------|----------|
| 6   | 169561507  | 1                    | 1       | <i>rs13208844</i> | A   | G   | 0.02     | 0.09     | 0.00     | 0.14     |            |                        |                        |       |                | Osl2, Sox                                             |                    |                |                    |               | <i>WDR27</i>     | intronic |
| 6   | 169561539  | 1                    | 1       | <i>rs13192566</i> | G   | C   | 0.02     | 0.09     | 0.00     | 0.14     |            |                        |                        |       |                | Arid3a, Foxd3, Foxj1, Foxp1, Lhx3, Meis2, Pou2f2, Sox |                    |                |                    |               | <i>WDR27</i>     | intronic |

## K. Daytime Sleepiness: chr 1: *rs192315283* (*HSD52* region)

Query SNP: *rs192315283* and variants with  $r^2 \geq 0.8$

| chr | pos (hg38) | LD (r <sup>2</sup> ) | LD (D') | variant            | Ref | Alt | AFR freq | AMR freq | ASN freq | GERP cons | SIPhy cons | Promoter histone marks | Enhancer histone marks | DNase | Proteins bound | Motifs changed | NHGR/EBI GWAS hits | GRASP QTL hits | Selected eQTL hits | RefSeq genes | dbSNP func annot        |  |
|-----|------------|----------------------|---------|--------------------|-----|-----|----------|----------|----------|-----------|------------|------------------------|------------------------|-------|----------------|----------------|--------------------|----------------|--------------------|--------------|-------------------------|--|
| 1   | 59065871   | 1                    | 1       | <i>rs192315283</i> | T   | C   | 0.00     | 0.01     | 0.00     | 0.00      |            |                        | ESC, IPSC, BLD, GI     |       |                | Es, FEV, KAP1  |                    |                |                    |              | 66kb 3' of <i>HSD52</i> |  |

## L. Daytime Sleepiness: chr 2: *rs76645968* (*ASB3* region)

Query SNP: **rs76645968** and variants with  $r^2 \geq 0.8$

| chr | pos (hg38) | LD (r <sup>2</sup> ) | LD (D) | variant     | Ref Alt | AFR freq | AMR freq | ASN freq | EUR freq | GERP cons | SiPhy cons | Promoter histone marks | Enhancer histone marks | DNase     | Proteins bound | Motifs changed      | NHGRV/EBI GWAS hits | GRASP QTL hits | Selected eQTL hits | RefSeq genes | dbSNP func annot |
|-----|------------|----------------------|--------|-------------|---------|----------|----------|----------|----------|-----------|------------|------------------------|------------------------|-----------|----------------|---------------------|---------------------|----------------|--------------------|--------------|------------------|
| 2   | 53572585   | 0.85                 | 0.92   | rs76439787  | C T     | 0.11     | 0.02     | 0.11     | 0.02     |           |            |                        | BRN, SKIN              |           |                |                     |                     |                |                    | ASB3         |                  |
| 2   | 53574044   | 0.85                 | 0.92   | rs75053193  | C T     | 0.11     | 0.02     | 0.11     | 0.02     |           |            |                        |                        |           |                | COMP1, Myb          |                     |                |                    | ASB3         |                  |
| 2   | 53577608   | 0.85                 | 0.92   | rs113179523 | C T     | 0.11     | 0.02     | 0.12     | 0.02     |           |            |                        |                        |           |                | CEBPA, CEBPD, Zbtb3 |                     |                |                    | ASB3         |                  |
| 2   | 53582654   | 0.85                 | 0.92   | rs74423855  | A C     | 0.10     | 0.02     | 0.12     | 0.02     |           |            |                        | ESDR, BRST, PANC       | ESDR      |                | DMRT2, Irf          |                     |                |                    | ASB3         |                  |
| 2   | 53585159   | 0.85                 | 0.92   | rs75308954  | G A     | 0.11     | 0.02     | 0.12     | 0.02     |           |            |                        | SKIN                   | 6 tissues |                | 5 altered motifs    |                     |                |                    | ASB3         |                  |
| 2   | 53586346   | 0.85                 | 0.92   | rs79111406  | A C     | 0.11     | 0.02     | 0.12     | 0.02     |           |            |                        |                        |           |                | 13 altered motifs   |                     |                |                    | ASB3         |                  |
| 2   | 53587275   | 0.85                 | 0.92   | rs143705825 | G C     | 0.11     | 0.02     | 0.12     | 0.02     |           |            | 4 tissues              | IPSC                   |           |                | 4 altered motifs    |                     |                |                    | ASB3         |                  |
| 2   | 53597333   | 1                    | 1      | rs12328289  | G A     | 0.18     | 0.02     | 0.11     | 0.02     |           |            |                        |                        |           |                |                     |                     |                |                    | ASB3         |                  |
| 2   | 53600549   | 1                    | 1      | rs76645968  | G C     | 0.11     | 0.02     | 0.09     | 0.02     |           |            |                        | BRN, GI, PANC          |           |                | NRSF                |                     |                |                    | ASB3         |                  |
| 2   | 53602735   | 0.93                 | 1      | rs112343600 | C A     | 0.04     | 0.03     | 0.08     | 0.02     |           |            |                        |                        |           |                | DMRT7               |                     |                |                    | ASB3         |                  |
| 2   | 53604330   | 0.93                 | 1      | rs13420159  | G T     | 0.10     | 0.02     | 0.08     | 0.02     |           |            |                        |                        |           |                | Evi-1               |                     | 1 hit          |                    | ASB3         |                  |
| 2   | 53604370   | 0.93                 | 1      | rs79064228  | G A     | 0.10     | 0.03     | 0.08     | 0.02     |           |            |                        |                        |           |                |                     |                     |                |                    | ASB3         |                  |
| 2   | 53606030   | 0.86                 | 1      | rs12469384  | A C     | 0.04     | 0.10     | 0.08     | 0.02     |           |            |                        |                        |           |                | 6 altered motifs    |                     |                |                    | ASB3         |                  |

### M. Daytime Sleepiness: chr 3: *rs920065* (*MRPS35P1*/*MRPS36P1* region)

Query SNP: **rs920065** and variants with  $r^2 \geq 0.8$

| chr | pos (hg38) | LD (r <sup>2</sup> ) | LD (D) | variant   | Ref Alt | AFR freq | AMR freq | ASN freq | EUR freq | GERP cons | SiPhy cons | Promoter histone marks | Enhancer histone marks | DNase | Proteins bound | Motifs changed                                                                           | NHGRV/EBI GWAS hits | GRASP QTL hits | Selected eQTL hits | RefSeq genes        | dbSNP func annot |
|-----|------------|----------------------|--------|-----------|---------|----------|----------|----------|----------|-----------|------------|------------------------|------------------------|-------|----------------|------------------------------------------------------------------------------------------|---------------------|----------------|--------------------|---------------------|------------------|
| 3   | 5852089    | 1                    | 1      | rs920065  | G C     | 0.75     | 0.89     | 0.99     | 0.82     |           |            |                        |                        |       |                | ATF3, EBF, Ir, Klf4, Klf7, NRSF, PPAR, SP1                                               |                     |                |                    | 602kb 5' of MIR4790 |                  |
| 3   | 5856870    | 0.89                 | -0.95  | rs5846411 | T C     | 0.24     | 0.23     | 0.03     | 0.18     |           |            |                        |                        |       |                | CDP, Cart1, Cdx2, Foxf2, Foxl1, Foxk1, Foxl1, Hoxa10, Hoxb6, Hoxb9, Hoxd10, Pou2f2, TATA |                     |                |                    | 607kb 5' of MIR4790 |                  |

### N. Daytime Sleepiness: chr 4: *rs115320831* (*TMEM144* region)

Query SNP: **rs115320831** and variants with  $r^2 \geq 0.8$

| chr | pos (hg38) | LD (r <sup>2</sup> ) | LD (D) | variant     | Ref Alt | AFR freq | AMR freq | ASN freq | EUR freq | GERP cons | SiPhy cons | Promoter histone marks | Enhancer histone marks | DNase | Proteins bound | Motifs changed                                               | NHGRV/EBI GWAS hits | GRASP QTL hits | Selected eQTL hits | RefSeq genes        | dbSNP func annot |
|-----|------------|----------------------|--------|-------------|---------|----------|----------|----------|----------|-----------|------------|------------------------|------------------------|-------|----------------|--------------------------------------------------------------|---------------------|----------------|--------------------|---------------------|------------------|
| 4   | 158257212  | 0.85                 | 0.93   | rs9790344   | G A     | 0.46     | 0.65     | 0.81     | 0.69     |           |            |                        |                        |       |                | Cdx, Foxl1, Foxp1, Mef2, Nanog, Pou1f1, Pou2f2, Pou3f3, TATA |                     |                |                    | 1.9kb 3' of TMEM144 |                  |
| 4   | 158257223  | 1                    | 1      | rs115320831 | G A     | 0.44     | 0.67     | 0.80     | 0.69     |           |            |                        |                        |       |                | Foxp1, Pou2f2, SIX5, TATA                                    |                     |                |                    | 1.9kb 3' of TMEM144 |                  |

### O. Daytime Sleepiness: chr 5: *rs35309287* (*DPYSL3* region)

Query SNP: **rs35309287** and variants with  $r^2 \geq 0.8$

| chr | pos (hg38) | LD (r <sup>2</sup> ) | LD (D) | variant    | Ref Alt | AFR freq | AMR freq | ASN freq | EUR freq | GERP cons | SiPhy cons | Promoter histone marks | Enhancer histone marks    | DNase | Proteins bound                                               | Motifs changed | NHGRV/EBI GWAS hits | GRASP QTL hits | Selected eQTL hits | RefSeq genes    | dbSNP func annot |
|-----|------------|----------------------|--------|------------|---------|----------|----------|----------|----------|-----------|------------|------------------------|---------------------------|-------|--------------------------------------------------------------|----------------|---------------------|----------------|--------------------|-----------------|------------------|
| 5   | 147395347  | 0.88                 | 1      | rs58999815 | G A     | 0.20     | 0.08     | 0.26     | 0.04     |           |            |                        | ESDR                      |       | Zfx                                                          |                |                     |                |                    | DPYSL3 intronic |                  |
| 5   | 147395822  | 1                    | 1      | rs34398961 | C A     | 0.00     | 0.01     | 0.00     | 0.04     |           |            |                        | ESDR, FAT, OVRY, HRT, LNG |       | GATA, Gsc, Obox3                                             |                |                     |                |                    | DPYSL3 intronic |                  |
| 5   | 147395823  | 1                    | 1      | rs35309287 | T A     | 0.00     | 0.01     | 0.00     | 0.04     |           |            |                        | ESDR, FAT, OVRY, HRT, LNG |       | Cart1, Egr-1, Foxp1, Hoxa5, Obox3, Pax-5, Pax-6, Sox, Zfp105 |                |                     |                | DPYSL3 intronic    |                 |                  |

### P. Daytime Sleepiness: chr 6: *rs189689339* (*FAM46A* region)

Query SNP: **rs189689339** and variants with  $r^2 \geq 0.8$

| chr | pos (hg38) | LD (r <sup>2</sup> ) | LD (D) | variant     | Ref Alt | AFR freq | AMR freq | ASN freq | EUR freq | GERP cons | SiPhy cons | Promoter histone marks | Enhancer histone marks | DNase | Proteins bound | Motifs changed | NHGRV/EBI GWAS hits | GRASP QTL hits | Selected eQTL hits | RefSeq genes      | dbSNP func annot |
|-----|------------|----------------------|--------|-------------|---------|----------|----------|----------|----------|-----------|------------|------------------------|------------------------|-------|----------------|----------------|---------------------|----------------|--------------------|-------------------|------------------|
| 6   | 8166565    | 1                    | 1      | rs189689339 | C T     | 0.00     | 0.01     | 0.00     | 0.00     |           |            |                        |                        |       |                | SREBP, p300    |                     |                |                    | 80kb 3' of FAM46A |                  |

### Q. Daytime Sleepiness: chr 15: *rs17507216* (*CPEB1* region)

Query SNP: **rs17507216** and variants with  $r^2 \geq 0.8$

| chr | pos (hg38) | LD (r <sup>2</sup> ) | LD (D) | variant     | Ref   | Alt | AFR freq | AMR freq | ASN freq | EUR freq | GERP cons | SiPhy cons | Promoter histone marks | Enhancer histone marks | DNase | Proteins bound | Motifs changed | NHGRV/EBI GWAS hits | GRASP QTL hits | Selected eQTL hits | RefSeq genes | dbSNP func annot |          |
|-----|------------|----------------------|--------|-------------|-------|-----|----------|----------|----------|----------|-----------|------------|------------------------|------------------------|-------|----------------|----------------|---------------------|----------------|--------------------|--------------|------------------|----------|
| 15  | 82546384   | 0.98                 | 0.99   | rs62009918  | C     | T   | 0.05     | 0.14     | 0.00     | 0.22     |           |            |                        |                        |       |                |                |                     |                | 51 hits            | CPEB1        | intronic         |          |
| 15  | 82547676   | 0.98                 | 0.99   | rs138634162 | CTTTA | C   | 0.05     | 0.14     | 0.00     | 0.22     |           |            |                        |                        |       |                |                |                     |                | 18 altered motifs  | CPEB1        | intronic         |          |
| 15  | 82552642   | 0.91                 | 0.99   | rs3850610   | C     | A   | 0.31     | 0.19     | 0.00     | 0.23     |           |            |                        |                        |       |                |                |                     |                | 7 hits             | 55 hits      | CPEB1            | intronic |
| 15  | 82555178   | 0.93                 | 0.97   | rs138343388 | TA    | T   | 0.09     | 0.14     | 0.00     | 0.22     |           |            |                        |                        |       |                |                |                     |                | 10 altered motifs  | 53 hits      | CPEB1            | intronic |
| 15  | 82558175   | 1                    | 1      | rs17507216  | G     | A   | 0.12     | 0.15     | 0.00     | 0.22     |           |            |                        |                        |       |                |                |                     |                | 1 hit              | 57 hits      | CPEB1            | intronic |
| 15  | 82559335   | 0.93                 | 1      | rs10610891  | GCA   | G   | 0.31     | 0.19     | 0.01     | 0.23     |           |            |                        |                        |       |                |                |                     |                |                    |              | CPEB1            | intronic |
| 15  | 82559444   | 0.98                 | 1      | rs172151943 | T     | C   | 0.05     | 0.14     | 0.00     | 0.22     |           |            |                        |                        |       |                |                |                     |                |                    |              | CPEB1            | intronic |
| 15  | 82566658   | 0.86                 | 0.95   | rs17158413  | G     | A   | 0.17     | 0.15     | 0.01     | 0.23     |           |            |                        |                        |       |                |                |                     |                |                    | 51 hits      | CPEB1            | intronic |
| 15  | 82567642   | 0.92                 | 0.96   | rs28648832  | A     | G   | 0.18     | 0.14     | 0.00     | 0.22     |           |            |                        |                        |       |                |                |                     |                |                    | 49 hits      | CPEB1            | intronic |
| 15  | 82569149   | 0.95                 | 0.99   | rs17356118  | A     | G   | 0.18     | 0.15     | 0.00     | 0.22     |           |            | BRN                    | ESDR, IPSC, FAT, STRM  |       |                |                |                     |                |                    | 50 hits      | CPEB1            | intronic |
| 15  | 82569149   | 0.95                 | 0.99   | rs17356118  | A     | G   | 0.18     | 0.15     | 0.00     | 0.22     |           |            | BRN                    | ESDR, IPSC, FAT, STRM  |       |                |                |                     |                |                    | 49 hits      | CPEB1            | intronic |

### R. Daytime Sleepiness: chr X: *rs73536079* (*AR*, *OPHN1* region)

Query SNP: *rs73536079* and variants with  $r^2 \geq 0.6$

| chr | pos (hg38) | LD (r <sup>2</sup> ) | LD (D) | variant           | Ref Alt | AFR freq | AMR freq | ASN freq | EUR freq | GERP cons | SIPhy cons | Promoter histone marks | Enhancer histone marks | DNase | Proteins bound | Motifs changed                           | NHGR/EBI GWAS hits | GRASP QTL hits | Selected eQTL hits | GENCODE genes           | RefSeq genes      | dbSNP func annot |
|-----|------------|----------------------|--------|-------------------|---------|----------|----------|----------|----------|-----------|------------|------------------------|------------------------|-------|----------------|------------------------------------------|--------------------|----------------|--------------------|-------------------------|-------------------|------------------|
| X   | 67934364   | 1                    | 1      | <i>rs73536079</i> | G T     | 0.21     | 0.03     | 0.00     | 0.00     |           |            |                        |                        |       |                | Foxd1, Foxf2, Foxo, HP1-site-factor, LXR |                    |                |                    | 79kb 3' of RP6-201G10.2 | 108kb 3' of OPHN1 |                  |

### S. Daytime Sleepiness: chr 3: *rs182765975* (*ROBO1* region)

Query SNP: *rs182765975* and variants with  $r^2 \geq 0.8$

| chr | pos (hg38) | LD (r <sup>2</sup> ) | LD (D) | variant            | Ref Alt | AFR freq | AMR freq | ASN freq | EUR freq | GERP cons | SIPhy cons | Promoter histone marks | Enhancer histone marks | DNase | Proteins bound | Motifs changed                                  | NHGR/EBI GWAS hits | GRASP QTL hits | Selected eQTL hits | GENCODE genes     | RefSeq genes | dbSNP func annot |
|-----|------------|----------------------|--------|--------------------|---------|----------|----------|----------|----------|-----------|------------|------------------------|------------------------|-------|----------------|-------------------------------------------------|--------------------|----------------|--------------------|-------------------|--------------|------------------|
| 3   | 78480491   | 1                    | 1      | <i>rs191435135</i> | C A     | 0.00     | 0.00     | 0.00     | 0.00     |           |            |                        |                        |       |                | AIRE, Nkx2, Nkx3, Sox                           |                    |                |                    | 117kb 3' of ROBO1 |              |                  |
| 3   | 78489281   | 1                    | 1      | <i>rs182765975</i> | G T     | 0.00     | 0.00     | 0.00     | 0.00     |           |            |                        |                        |       |                |                                                 |                    |                |                    | 108kb 3' of ROBO1 |              |                  |
| 3   | 78571249   | 1                    | 1      | <i>rs182979911</i> | G A     | 0.00     | 0.00     | 0.00     | 0.00     |           |            | SKIN, CRVX             |                        |       |                | Cart1, HNF1, Hoxa5, Hoxb3, Nkx1-1, Pou6f1, Vax2 |                    |                |                    | 26kb 3' of ROBO1  |              |                  |

### T. Daytime Sleepiness: chr 12: *rs142261172* (*TMEM132B* region)

Query SNP: *rs142261172* and variants with  $r^2 \geq 0.8$

| chr | pos (hg38) | LD (r <sup>2</sup> ) | LD (D) | variant            | Ref Alt | AFR freq | AMR freq | ASN freq | EUR freq | GERP cons | SIPhy cons | Promoter histone marks | Enhancer histone marks | DNase | Proteins bound | Motifs changed | NHGR/EBI GWAS hits | GRASP QTL hits | Selected eQTL hits | GENCODE genes | RefSeq genes | dbSNP func annot |
|-----|------------|----------------------|--------|--------------------|---------|----------|----------|----------|----------|-----------|------------|------------------------|------------------------|-------|----------------|----------------|--------------------|----------------|--------------------|---------------|--------------|------------------|
| 12  | 125538767  | 1                    | 1      | <i>rs189248822</i> | A G     | 0.00     | 0.00     | 0.00     | 0.00     |           |            |                        | BRN                    | BRN   |                |                |                    |                |                    | TMEM132B      | TMEM132B     | intronic         |
| 12  | 125565435  | 1                    | 1      | <i>rs142261172</i> | G A     | 0.00     | 0.00     | 0.00     | 0.00     |           |            |                        |                        | BLD   |                | GR             |                    |                |                    | TMEM132B      | TMEM132B     | intronic         |

### U. Multi-sleep Trait: chr 1: *rs12140153* (*INADL* region)

Query SNP: *rs12140153* and variants with  $r^2 \geq 0.8$

| chr | pos (hg38) | LD (r <sup>2</sup> ) | LD (D) | variant           | Ref Alt | AFR freq | AMR freq | ASN freq | EUR freq | GERP cons | SIPhy cons | Promoter histone marks | Enhancer histone marks | DNase | Proteins bound | Motifs changed                        | NHGR/EBI GWAS hits | GRASP QTL hits | Selected eQTL hits | GENCODE genes | RefSeq genes | dbSNP func annot |
|-----|------------|----------------------|--------|-------------------|---------|----------|----------|----------|----------|-----------|------------|------------------------|------------------------|-------|----------------|---------------------------------------|--------------------|----------------|--------------------|---------------|--------------|------------------|
| 1   | 62114219   | 1                    | 1      | <i>rs12140153</i> | G T     | 0.00     | 0.02     | 0.00     | 0.07     |           |            |                        |                        |       |                | ATF3, E2F, Egr-1, Myc, NRSF, YY1, Zfx |                    |                |                    | INADL         | INADL        | missense         |

### V. Multi-sleep Trait: chr 6: *rs3122163* (*HCRTR2* region)

Query SNP: *rs3122163* and variants with  $r^2 \geq 0.8$

| chr | pos (hg38) | LD (r <sup>2</sup> ) | LD (D) | variant           | Ref Alt | AFR freq | AMR freq | ASN freq | EUR freq | GERP cons | SIPhy cons | Promoter histone marks | Enhancer histone marks | DNase | Proteins bound                | Motifs changed | NHGR/EBI GWAS hits | GRASP QTL hits | Selected eQTL hits | GENCODE genes | RefSeq genes       | dbSNP func annot |
|-----|------------|----------------------|--------|-------------------|---------|----------|----------|----------|----------|-----------|------------|------------------------|------------------------|-------|-------------------------------|----------------|--------------------|----------------|--------------------|---------------|--------------------|------------------|
| 6   | 55148181   | 0.92                 | -0.96  | <i>rs4605886</i>  | C A     | 0.03     | 0.15     | 0.01     | 0.20     |           |            |                        |                        |       |                               |                |                    |                |                    |               | 26kb 5' of HCRTR2  |                  |
| 6   | 55150357   | 0.89                 | -0.97  | <i>rs71548698</i> | C T     | 0.05     | 0.16     | 0.02     | 0.21     |           |            |                        |                        |       | GR, Pou3f2                    |                |                    |                |                    |               | 24kb 5' of HCRTR2  |                  |
| 6   | 55152221   | 0.94                 | -0.97  | <i>rs11751312</i> | T G     | 0.03     | 0.15     | 0.01     | 0.20     |           |            |                        |                        |       |                               |                |                    |                |                    |               | 22kb 5' of HCRTR2  |                  |
| 6   | 55152960   | 0.89                 | -0.97  | <i>rs78463216</i> | C T     | 0.05     | 0.16     | 0.02     | 0.21     |           |            |                        |                        |       | Gli1, Hdx, Nanog              |                |                    |                |                    |               | 21kb 5' of HCRTR2  |                  |
| 6   | 55154687   | 0.89                 | -0.97  | <i>rs13215058</i> | A C     | 0.05     | 0.16     | 0.02     | 0.21     |           |            |                        |                        |       | 26 altered motifs             |                |                    |                |                    |               | 20kb 5' of HCRTR2  |                  |
| 6   | 55156763   | 0.97                 | -1     | <i>rs35833281</i> | G C     | 0.02     | 0.15     | 0.02     | 0.21     |           |            |                        |                        |       | 8 altered motifs              |                |                    |                |                    |               | 18kb 5' of HCRTR2  |                  |
| 6   | 55158331   | 0.97                 | -1     | <i>rs35835518</i> | G C     | 0.03     | 0.15     | 0.02     | 0.21     |           |            |                        |                        |       | EBF                           |                |                    |                |                    |               | 16kb 5' of HCRTR2  |                  |
| 6   | 55158655   | 0.92                 | -1     | <i>rs13210609</i> | T A     | 0.10     | 0.17     | 0.03     | 0.22     |           |            |                        |                        |       | 5 altered motifs              |                |                    |                |                    |               | 16kb 5' of HCRTR2  |                  |
| 6   | 55160002   | 0.97                 | -1     | <i>rs9475183</i>  | A C     | 0.09     | 0.16     | 0.02     | 0.21     |           |            |                        |                        |       |                               |                |                    |                |                    |               | 14kb 5' of HCRTR2  |                  |
| 6   | 55160329   | 0.91                 | -0.98  | <i>rs13219093</i> | G A     | 0.10     | 0.17     | 0.03     | 0.21     |           |            |                        |                        |       | EBF                           |                |                    |                |                    |               | 14kb 5' of HCRTR2  |                  |
| 6   | 55161624   | 0.92                 | -1     | <i>rs9475184</i>  | G A     | 0.10     | 0.17     | 0.03     | 0.22     |           |            |                        |                        |       | 9 altered motifs              |                |                    |                |                    |               | 13kb 5' of HCRTR2  |                  |
| 6   | 55161909   | 0.92                 | -1     | <i>rs9484202</i>  | T A     | 0.10     | 0.17     | 0.03     | 0.22     |           |            |                        |                        |       | Gli1, Gli3                    |                |                    |                |                    |               | 12kb 5' of HCRTR2  |                  |
| 6   | 55162672   | 0.97                 | -1     | <i>rs9475185</i>  | C T     | 0.09     | 0.16     | 0.02     | 0.21     |           |            |                        |                        |       |                               |                |                    |                |                    |               | 12kb 5' of HCRTR2  |                  |
| 6   | 55163555   | 0.92                 | -1     | <i>rs13201560</i> | C T     | 0.10     | 0.17     | 0.03     | 0.22     |           |            |                        |                        |       | AIRE, HP1-site-factor, Pou2f2 |                |                    |                |                    |               | 11kb 5' of HCRTR2  |                  |
| 6   | 55167192   | 0.92                 | -1     | <i>rs60866755</i> | T A     | 0.09     | 0.17     | 0.03     | 0.22     |           |            |                        |                        |       | CEBPA, E2F, Foxq2, Mxi1       |                |                    |                |                    |               | 7.1kb 5' of HCRTR2 |                  |
| 6   | 55167265   | 0.97                 | -1     | <i>rs28385614</i> | C T     | 0.09     | 0.16     | 0.02     | 0.21     |           |            |                        |                        |       | 9 altered motifs              |                |                    |                |                    |               | 7kb 5' of HCRTR2   |                  |
| 6   | 55168425   | 0.92                 | -1     | <i>rs13200042</i> | A G     | 0.09     | 0.17     | 0.03     | 0.22     |           |            |                        |                        |       |                               |                |                    | 1 ht           |                    |               | 5.8kb 5' of HCRTR2 |                  |
| 6   | 55170868   | 0.97                 | -0.98  | <i>rs12333106</i> | T C     | 0.08     | 0.15     | 0.02     | 0.20     |           |            |                        |                        |       |                               |                |                    |                |                    |               | 3.4kb 5' of HCRTR2 |                  |
| 6   | 55171646   | 0.92                 | -1     | <i>rs13198933</i> | T C     | 0.09     | 0.17     | 0.03     | 0.22     |           |            |                        |                        |       |                               |                |                    |                |                    |               | 2.6kb 5' of HCRTR2 |                  |
| 6   | 55171962   | 0.97                 | -1     | <i>rs71560898</i> | C A     | 0.02     | 0.15     | 0.02     | 0.21     |           |            |                        |                        |       | SIX5                          |                |                    |                |                    |               | 2.3kb 5' of HCRTR2 |                  |
| 6   | 55172034   | 0.97                 | -1     | <i>rs34522972</i> | G A     | 0.02     | 0.15     | 0.02     | 0.21     |           |            |                        |                        |       | ATF3                          |                |                    |                |                    |               | 2.2kb 5' of HCRTR2 |                  |
| 6   | 55172326   | 0.97                 | -1     | <i>rs9484203</i>  | G A     | 0.09     | 0.16     | 0.02     | 0.21     |           |            |                        |                        |       | 5 altered motifs              |                |                    |                |                    |               | 1.9kb 5' of HCRTR2 |                  |
| 6   | 55173160   | 0.92                 | -1     | <i>rs4609033</i>  | A C     | 0.09     | 0.17     | 0.03     | 0.22     |           |            |                        | PANC                   |       | Myc, Pou5f1, STAT             |                |                    | 1 ht           |                    |               | 1.1kb 5' of HCRTR2 |                  |
| 6   | 55174988   | 0.92                 | -1     | <i>rs9475188</i>  | C T     | 0.10     | 0.17     | 0.03     | 0.22     |           |            |                        |                        |       | Ets                           |                |                    |                |                    |               | HCRTR2             | intronic         |
| 6   | 55175590   | 0.97                 | -1     | <i>rs6475116</i>  | C A     | 0.09     | 0.16     | 0.02     | 0.21     |           |            |                        |                        |       | Mei2, Nanog, TATA, TEF        |                |                    |                |                    |               | HCRTR2             | intronic         |
| 6   | 55179214   | 0.97                 | -1     | <i>rs13198934</i> | G C     | 0.03     | 0.16     | 0.02     | 0.21     |           |            |                        |                        |       | Foxp1                         |                |                    |                |                    |               | HCRTR2             | intronic         |
| 6   | 55186254   | -1                   | -1     | <i>rs34894541</i> | T G     | 0.02     | 0.15     | 0.02     | 0.20     |           |            |                        |                        |       | 12 altered motifs             |                |                    |                |                    |               | HCRTR2             | intronic         |
| 6   | 55191570   | 1                    | 1      | <i>rs3122163</i>  | C T     | 0.97     | 0.85     | 0.98     | 0.80     |           |            |                        |                        |       |                               |                |                    |                |                    |               | HCRTR2             | intronic         |
| 6   | 55194200   | 1                    | 1      | <i>rs3122170</i>  | C A     | 0.97     | 0.85     | 0.98     | 0.80     |           |            |                        |                        |       | Ahr                           |                |                    |                |                    |               | HCRTR2             | intronic         |
| 6   | 55199694   | 0.99                 | 1      | <i>rs3134698</i>  | C T     | 0.98     | 0.85     | 0.97     | 0.80     |           |            |                        |                        |       | 6 altered motifs              |                |                    |                |                    |               | HCRTR2             | intronic         |
| 6   | 55207475   | 0.86                 | 0.98   | <i>rs3134704</i>  | G A     | 0.87     | 0.77     | 0.80     | 0.78     |           |            |                        |                        |       | Cdc5, Mei2                    |                |                    |                |                    |               | HCRTR2             | intronic         |
| 6   | 55213660   | 0.99                 | 1      | <i>rs3122154</i>  | T C     | 0.98     | 0.85     | 0.98     | 0.80     |           |            |                        |                        |       | STAT                          |                |                    |                |                    |               | HCRTR2             | intronic         |
| 6   | 55214989   | 0.98                 | 1      | <i>rs3134707</i>  | G A     | 0.98     | 0.85     | 0.98     | 0.80     |           |            |                        |                        |       | SKIN                          |                |                    |                |                    |               | HCRTR2             | intronic         |
| 6   | 55216558   | 0.94                 | 0.98   | <i>rs3122155</i>  | C G     | 0.98     | 0.75     | 0.58     | 0.80     |           |            |                        |                        |       | HNF1, PLZF, RFX5, p53         |                |                    |                |                    |               | HCRTR2             | intronic         |

**Supplementary Figure 5. Functional annotations of associated variants from Haploreg 4.1.** Annotations of lead SNPs and correlated variants ( $r^2 > 0.8$  to lead SNP except as indicated) are derived based on documentation available at <http://www.broadinstitute.org/mammals/haploreg/haploreg.php> and include human genome hg38 positions, LD ( $r^2$  and  $D'$ ) to lead SNP shown in red in the 1KG EUR population, allele frequency in 1KG continental populations, conserved regions by GERP and Siphy annotation, tissue-specific chromatin state methylation marks (promoter, enhancer marks) based on the core-HMM 15 state model, tissue-specific DNase1 hypersensitivity sites, bound proteins from Chip-seq experiments (ENCODE), predicted effect of regulatory SNP on transcription factor binding using position-weighted matrices, GWAS catalog hits (accessed October 31, 2015 by Haploreg 4.1), and GRASP build 2.0.0 QTLs complemented by 10 other eQTL studies including gTEX v6 and GEUVADIS analysis, as well as gene annotation by RefSeq and dbSNP annotation of variant function.

*BMAL1*

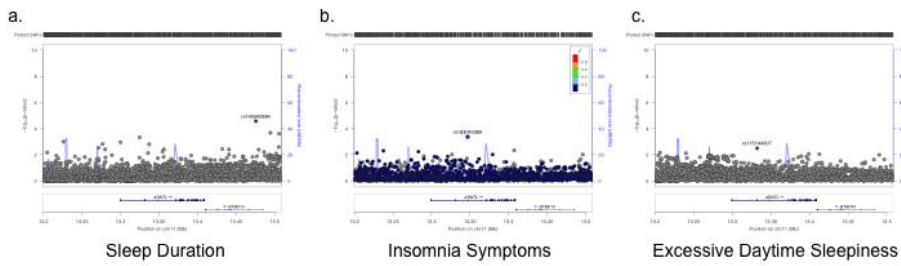

*BMAL2*

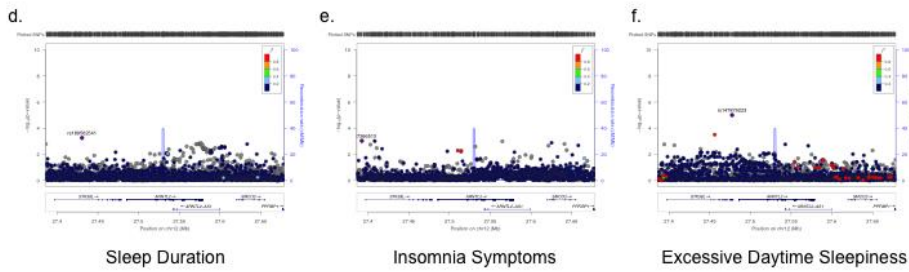

*CRY1*

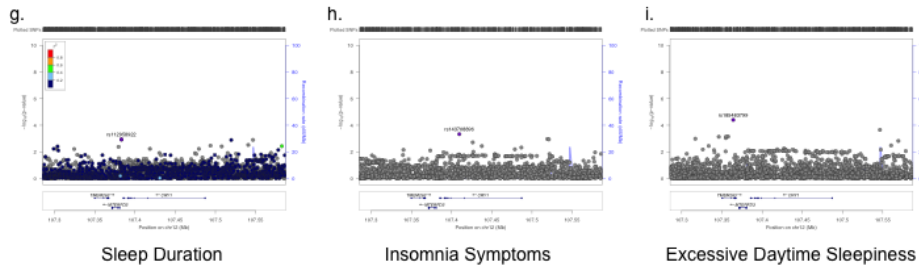

*CRY2*

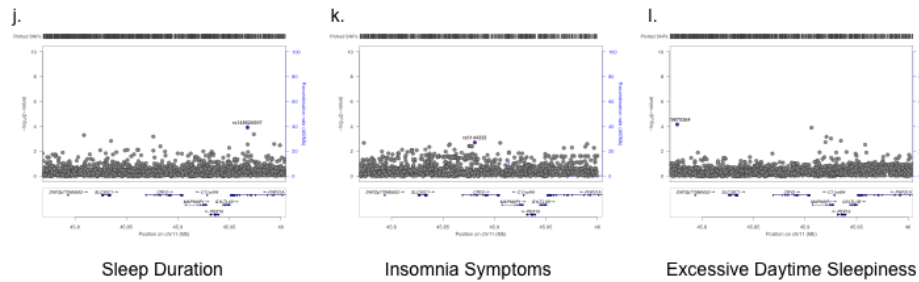

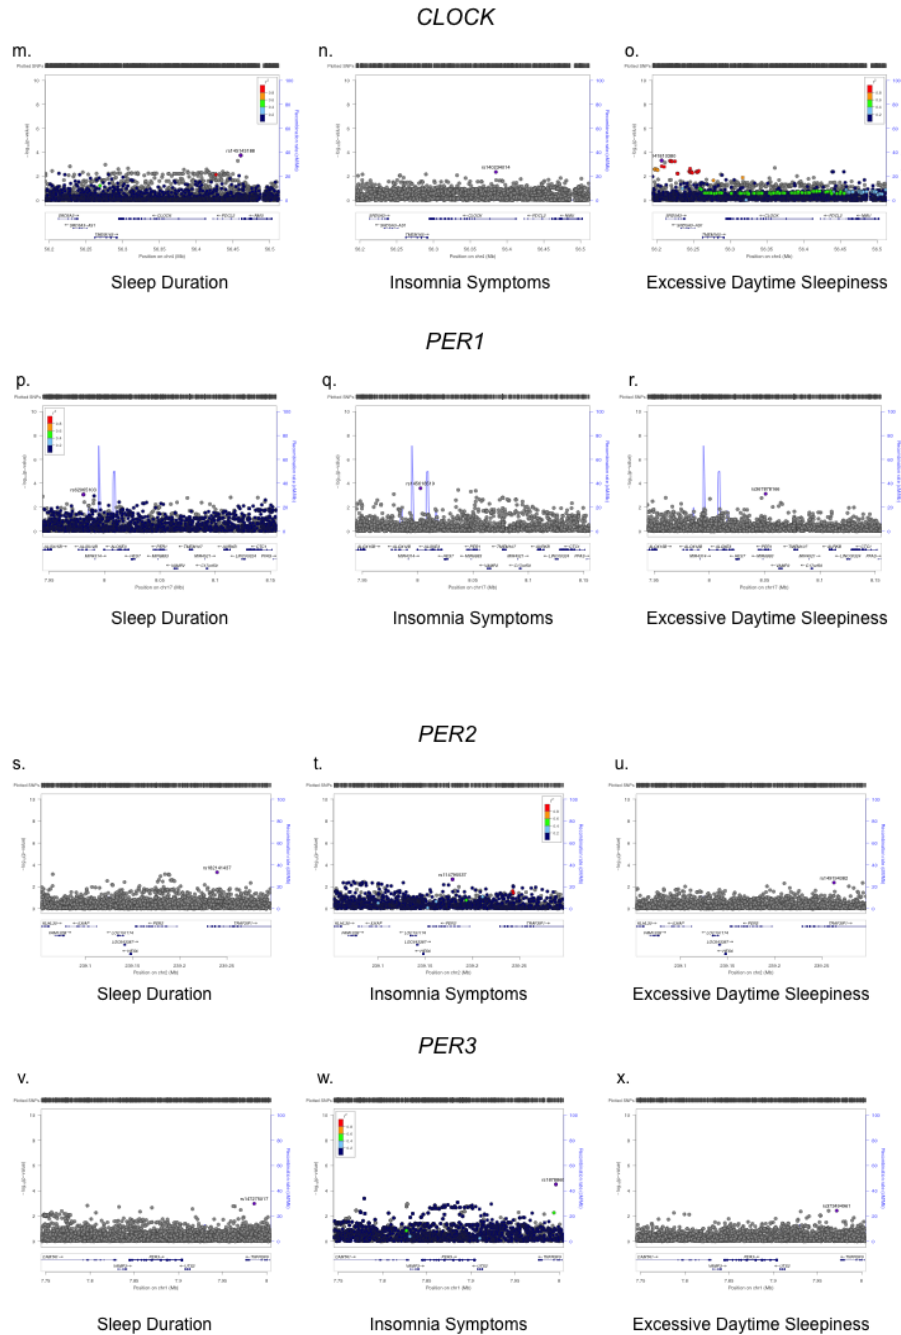

**Supplementary Figure 6. Association of core circadian clock gene regions with sleep traits.** Regional association plots for core circadian clock genes (*BMAL1* (a-c), *BMAL2* (d-f), *CRY1* (g-i), *CRY2* (j-l), *CLOCK* (m-o), *PER1* (p-r), *PER2* (s-u), *PER3* (v-x)) across sleep traits. Genes within the region are shown in the lower panel. The blue line indicates the recombination rate. Filled circles show the  $-\log_{10} p$ -value for each SNP, with the lead SNP shown in purple. Additional SNPs in the locus are colored according to correlation ( $r^2$ ) with the lead SNP (estimated by LocusZoom based on the CEU HapMap haplotypes).

A.

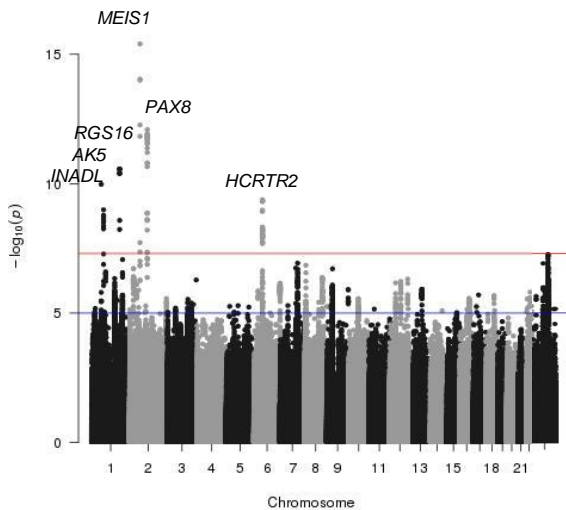

B.

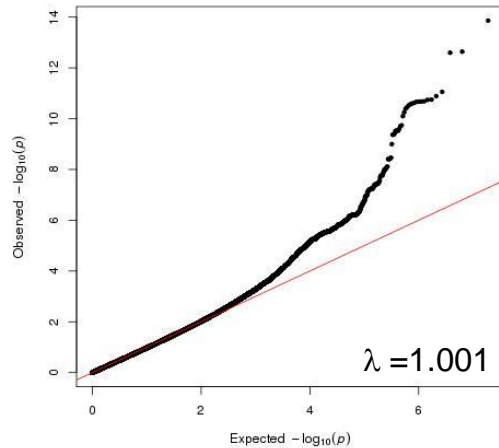

**Supplementary Figure 7. Manhattan and Q-Q plot for genome-wide association multi-trait analysis of sleep duration, insomnia symptoms, excessive daytime sleepiness, and chronotype.** Plot A shows the genome-wide association signals associated with the composite sleep phenotype. The Manhattan plot shows the  $-\log_{10} p$ -values (y-axis) for all genotyped and imputed SNPs passing quality control in each GWAS, plotted by chromosome (x-axis). Red line is genome-wide significant ( $5 \times 10^{-8}$ ) and blue line is  $1 \times 10^{-6}$ . Q-Q plot (B) shows the expected versus observed P values from our association analysis. Signals are annotated with nearest gene symbol. Plot B shows the expected versus observed  $p$ -values from the multi-trait association analysis. Heritability estimates were calculated using BOLT-REML and lambda inflation values were calculated using GenABEL in R.



A. unadjusted

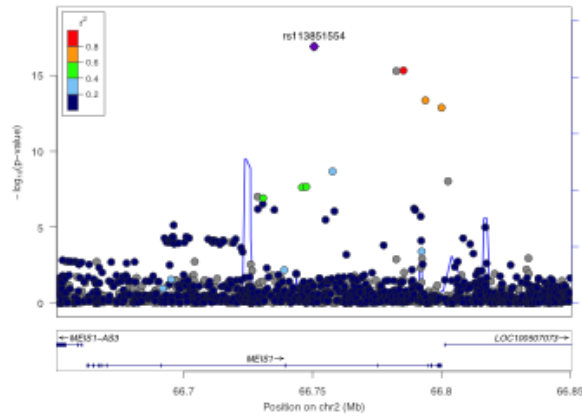

B. adjusted for lead SNP rs113851554

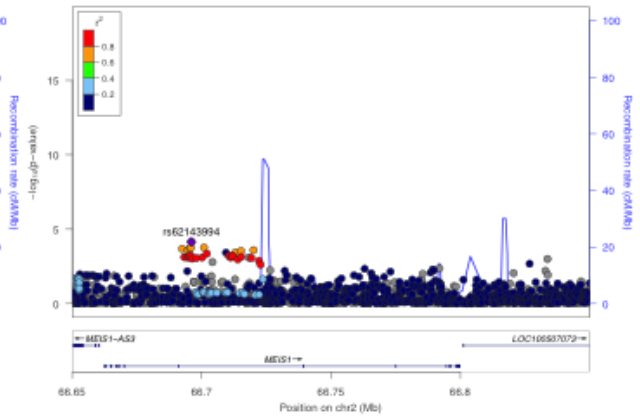

C. adjusted for RLS GWAS SNP rs2300478

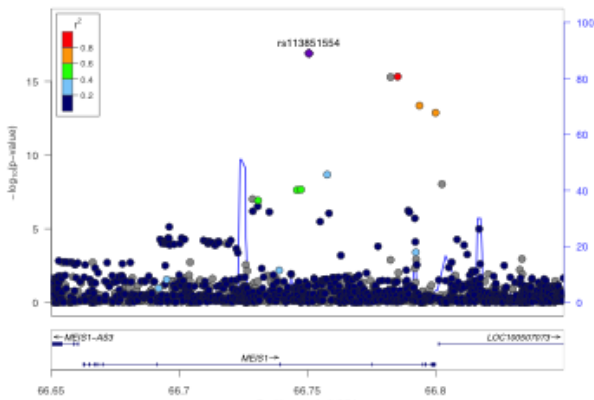

D. adjusted for RLS SNP rs11693221

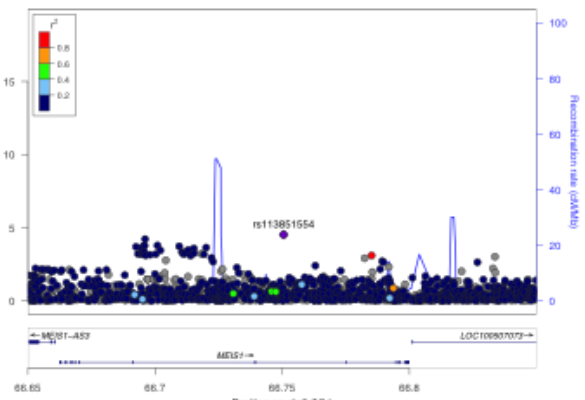

**Supplementary Figure 8. *MEIS1* region association with insomnia symptoms.** Regional association plot with lead association signal represented by SNP rs113851554 ( $p_{\text{unadj}}=10^{-19}$ ; plot A). Conditioning on the lead SNP abolishes the lead regional association signal and shows no strong secondary association signals (best SNP rs62143994,  $p=10^{-4}$ ; plot B). Analysis conditional on previously reported RLS GWAS SNP rs2300478 ( $p_{\text{unadj}}=0.01$ ; plot C) does not alter insomnia symptoms association signals. Analysis conditional on rs11693221, a rare *MEIS1* 3' UTR SNP discovered by sequence analysis and also associated with RLS, abolishes the lead association signal ( $p_{\text{unadj}}=10^{-14}$ ; plot D). Chromosomal position is indicated on the x-axis and  $-\log_{10} p$ -values for each SNP (filled circles) is indicated on the y-axis, with the lead SNP shown in purple (200kb window around lead SNP shown). Genes within the region are shown in the lower panel. The blue line indicates the recombination rate. Additional SNPs in the locus are colored according to linkage disequilibrium ( $r^2$ ) with the lead SNP (estimated by LocusZoom based on the CEU HapMap haplotypes).

Supplementary Table 1. Descriptive Characteristics of UKBiobank subjects of European ancestry used for GWAS (N=112,586).

| Characteristic                               | Mean (SD)<br>N cases (%) |                |                | Pair-wise Phenotype Correlation |        |                   |        |                              |        |
|----------------------------------------------|--------------------------|----------------|----------------|---------------------------------|--------|-------------------|--------|------------------------------|--------|
|                                              | Males                    | Females        | All            | Sleep Duration                  |        | Insomnia Symptoms |        | Excessive Daytime Sleepiness |        |
|                                              |                          |                |                | r                               | p-val  | r                 | p-val  | r                            | p-val  |
| Sex (M)                                      | 52,817 (47%)             | 59,868 (53%)   | 112,586        | -0.01                           | 0.002  | -0.14             | <0.001 | 0.04                         | <0.001 |
| Age, y                                       | 58.12 (7.96)             | 57.3 (7.83)    | 57.69 (7.90)   | 0.06                            | <0.001 | 0.09              | <0.001 | 0.13                         | <0.001 |
| Sleep duration, hrs                          | 7.19 (1.07)              | 7.19 (1.09)    | 7.19 (1.08)    | -                               | -      | -0.25             | <0.001 | -0.03                        | <0.001 |
| Insomnia Symptoms                            |                          |                |                | -0.25                           | <0.001 | -                 | -      | 0.08                         | <0.001 |
| Never/Rarely                                 | 16,009 (55.8%)           | 10,964 (36.0%) | 26,973 (46%)   |                                 |        |                   |        |                              |        |
| Usually                                      | 12,674 (44.2.0%)         | 19,481 (64.0%) | 32,155 (54%)   |                                 |        |                   |        |                              |        |
| Excessive Daytime Sleepiness                 |                          |                |                | -0.03                           | <0.001 | 0.08              | <0.001 | -                            | -      |
| Never/Rarely                                 | 39,613 (75.0%)           | 46,762 (78.1%) | 86,375 (76.7%) |                                 |        |                   |        |                              |        |
| Sometimes                                    | 11,496 (21.8%)           | 11,365 (19.0%) | 22,861 (20.3%) |                                 |        |                   |        |                              |        |
| Often                                        | 1,524 (2.9%)             | 1,446 (2.4%)   | 2,970 (2.6%)   |                                 |        |                   |        |                              |        |
| All of the time                              | 5 (0%)                   | 3 (0%)         | 8 (0%)         |                                 |        |                   |        |                              |        |
| Depression (n=96,409)                        | 1,913 (3.6%)             | 2,829 (4.7%)   | 4,242 (4.4%)   | -0.07                           | <0.001 | 0.18              | <0.001 | 0.11                         | <0.001 |
| Psychiatric Medication (n=112,867)           | 503 (1%)                 | 1,190 (2.0%)   | 1,693 (1.5%)   | 0.02                            | <0.001 | 0.03              | <0.001 | 0.01                         | <0.001 |
| Self-reported Sleep Apnea (n=99,500)         | 301 (0.6%)               | 97 (0.2%)      | 398 (0.4%)     | -0.01                           | 0.058  | 0.01              | 0.013  | 0.03                         | <0.001 |
| BMI, kg/m2 (n=75,640)                        | 29.66 (1.26)             | 27.66 (1.22)   | 29.23 (6.82)   | -0.01                           | 0.016  | 0.02              | <0.001 | 0.07                         | <0.001 |
| Townsend Deprivation Index (SES) (n=112,376) | -1.51 (3.02)             | -1.55 (2.92)   | -1.53 (2.97)   | -0.04                           | <0.001 | 0.05              | <0.001 | 0.05                         | <0.001 |
| Smoking Status (n=112,225)                   |                          |                |                | -0.02                           | <0.001 | 0.05              | <0.001 | 0.02                         | <0.001 |
| Never                                        | 26,236 (49.6%)           | 34,489 (57.9%) | 60,625 (54.0%) |                                 |        |                   |        |                              |        |
| Former                                       | 19,834 (37.7%)           | 18,704 (31.4%) | 38,538 (34.3%) |                                 |        |                   |        |                              |        |
| Current                                      | 6,670 (12.7%)            | 6,392 (10.7%)  | 13,062 (11.6%) |                                 |        |                   |        |                              |        |
| Employment Status, retired (n=102,416)       | 18,754 (38.6%)           | 22,799 (42.3%) | 41,553 (40.6%) | 0.13                            | <0.001 | 0.10              | <0.001 | 0.13                         | <0.001 |
| Marital Status, spouse/partner (n=103,565)   | 40,899 (82.2%)           | 42,027 (78.1%) | 82,926 (80.0%) | 0.05                            | <0.001 | -0.05             | <0.001 | -0.03                        | <0.001 |
| Snoring (n=104,945)                          | 24,119 (48.3%)           | 15,790 (28.7%) | 39,909 (38.0%) | -0.02                           | <0.001 | 0.04              | <0.001 | -0.09                        | <0.001 |

Self-reported measures of sleep duration, insomnia symptoms, and excessive daytime sleepiness, as well as covariates. Our sample size for each phenotype-specific GWAS is a subset of the 112,586. The smaller sample size for each GWAS is attributable to subjects with either missing, "prefer not to answer", or "don't know" responses. Phenotype correlation was calculated using the Spearman correlation.

Supplementary Table 2. Genome-wide significant results from sex stratified analyses for sleep traits in the UK Biobank.

| Trait                | SNP        | Chr:position<br>NCBI 37 | Nearest<br>Gene(s) | Alleles<br>(E/A) | EAF  | Imputation<br>Quality | Males         |                            |                             | Females       |                           |                             | interaction<br><i>p-val</i> |
|----------------------|------------|-------------------------|--------------------|------------------|------|-----------------------|---------------|----------------------------|-----------------------------|---------------|---------------------------|-----------------------------|-----------------------------|
|                      |            |                         |                    |                  |      |                       | n             | OR [95% CI]                | <i>p-val</i>                | n             | OR [95% CI]               | <i>p-val</i>                |                             |
| Insomnia<br>Symptoms | rs3792900  | 5:135393754             | <i>TGFBI</i>       | C/T              | 0.47 | 0.99                  | 28,511        | 1.007 [0.974-1.041]        | 0.70                        | <b>30,287</b> | <b>1.102 [1.065-1.14]</b> | <b>2.16x10<sup>-8</sup></b> | 2.55x10 <sup>-4</sup>       |
|                      | rs13192566 | 6:169961635             | <i>WDR27</i>       | G/C              | 0.86 | 0.99                  | <b>28,664</b> | <b>1.144 [1.091-1.200]</b> | <b>3.17x10<sup>-8</sup></b> | 30,420        | 1.000 [0.957-1.053]       | 0.8781                      | 8.89x10 <sup>-5</sup>       |

E=effect allele, A=alternative allele, Chr=chromosome, OR=Odds Ratio, CI=confidence interval, imputation quality from Impute2. EAF=effect allele frequency. Note, increasing odds ratio indicates increased insomnia symptoms. Analyses are adjusted for age, genetic ancestry and genotyping array and performed stratified by sex. Bold denotes genome-wide significant signals ( $p < 5 \times 10^{-8}$ ).

Supplementary Table 3. Conditional Analysis. Secondary signal is the lead SNP after conditioning on lead GWAS SNP.

| SNP                       | Nearest Gene(s)                     | Chr:position NCBI 37 | Secondary SNP   | Chr:position NCBI 37 | Alleles (E/A) | Beta (SE)          | <i>p-val</i> |
|---------------------------|-------------------------------------|----------------------|-----------------|----------------------|---------------|--------------------|--------------|
| <b>Sleep Duration</b>     |                                     |                      |                 |                      |               |                    |              |
| rs62158211                | <i>PAX8</i><br><i>LOC647016/</i>    | 2:114106139          | rs183854670     | 2:115284353          | G/T           | -0.75 (0.18)       | 4.63E-05     |
| rs1380703                 | <i>LOC100131953</i>                 | 2:57941287           | rs375652393     | 2:58089047           | T/C           | 0.48 (0.13)        | 2.64E-04     |
| rs10953765                | <i>FOXP2</i>                        | 7:114291435          | rs144294405     | 7:114368853          | T/TTC         | -0.10 (0.03)       | 5.98E-04     |
| rs146977851               | <i>PCDH15</i>                       | 10:56570954          | rs191835902     | 10:56511106          | A/G           | 0.59 (0.15)        | 8.59E-05     |
| rs61980273                | <i>PRIMA1</i>                       | 14:94218949          | rs184953371     | 14:94221477          | T/C           | -0.53 (0.11)       | 2.07E-06     |
|                           |                                     |                      |                 |                      |               | OR (95%CI)         |              |
| <b>Insomnia Symptoms</b>  |                                     |                      |                 |                      |               |                    |              |
| rs576106307               | <i>ARHGEF10L</i>                    | 1:18007282           | rs185896278     | 1:17807007           | T/C           | 3.52 (1.46 - 8.47) | 7.33E-05     |
| rs113851554               | <i>MEIS1</i>                        | 2:66750564           | rs62143994      | 2:66696080           | T/C           | 0.93 (0.90 - 0.96) | 7.10E-05     |
| rs376775068               | <i>ADCK5</i>                        | 8:145604659          | 8:145651625_C_T | 8:145651625          | T/C           | 0.33 (0.18 - 0.61) | 1.04E-05     |
| rs145258459               | <i>TMEM132E</i>                     | 17:32986155          | rs546643659     | 17:32812400          | A/G           | 1.35 (1.09 - 1.65) | 6.87E-04     |
| rs531814036               | <i>ACBD4</i>                        | 17:43219921          | rs186141052     | 17:43101593          | C/T           | 0.50 (0.21 - 1.21) | 6.01E-04     |
| rs182765975               | <i>ROBO1</i>                        | 3:78538431           | rs557285265     | 3:78706604           | A/G           | 0.55 (0.35 - 0.85) | 1.47E-04     |
| rs142261172               | <i>TMEM132B</i>                     | 12:126049981         | rs540711617     | 12:126033341         | T/A           | 1.29 (1.06 - 1.58) | 1.14E-04     |
| rs5922858                 | <i>CYCL1</i>                        | X:82971008           | rs147330274     | X:82957216           | C/T           | 1.14 (1.04 - 1.25) | 4.67E-03     |
| <b>Daytime Sleepiness</b> |                                     |                      |                 |                      |               |                    |              |
| rs192315283               | <i>HSD52</i>                        | 1:59531543           | rs371398972     | 1:59677576           | C/A           | 0.76(0.16)         | 2.40E-06     |
| rs76645968                | <i>ASB3</i>                         | 2:53827686           | rs570953237     | 2:54059985           | T/C           | 0.60 (0.14)        | 1.10E-05     |
| rs920065                  | <i>MRPS35P1/</i><br><i>MRPS36P1</i> | 3:5893776            | rs148404446     | 3:6138051            | T/A           | 0.31 (0.08)        | 1.37E-04     |
| rs115320831               | <i>TMEM144</i>                      | 4:159178375          | rs7663422       | 4:159185860          | A/C           | 0.39 (0.12)        | 7.74E-04     |
| rs35309287                | <i>DPYSL3</i>                       | 5:146775386          | 5:146997228_C_T | 5:146997228          | T/C           | 1.00 (0.27)        | 2.51E-04     |
| rs189689339               | <i>FAM46A</i>                       | 6:82375372           | rs562379407     | 6:82303450           | G/A           | 0.82 (0.21)        | 9.16E-05     |
| rs17507216                | <i>CPEB1</i>                        | 15:83226925          | rs189218438     | 15:83362909          | A/C           | 0.13 (0.04)        | 4.82E-04     |
| rs73536079                | <i>AR/OPHN1</i>                     | X:67154206           | rs4827412       | X:67288207           | A/G           | 0.01 (0.01)        | 2.13E-02     |

Conditional association results include a  $\pm 500$ kb window around the lead SNP. Chr=chromosome, E=effect allele, A=alternate allele, SE=standard error, OR=Odds ratio, 95%CI= 95% confidence interval.

Supplementary Table 4. Sensitivity analyses adjusting for factors known to associate with sleep duration, insomnia symptoms, or excessive daytime sleepiness.

|                          | SNP         | CHR         | POS         | Alleles (E/A) | INFO  | MAF    | N                             | Additional adjustment beyond baseline | Beta (SE)              | P                      |
|--------------------------|-------------|-------------|-------------|---------------|-------|--------|-------------------------------|---------------------------------------|------------------------|------------------------|
| <b>Sleep Duration</b>    | rs10953765  | 7           | 114,291,435 | A/G           | 0.977 | 0.446  | 74,025                        | -                                     | -0.02 (0.006)          | 9.34x10 <sup>-5</sup>  |
|                          |             |             |             |               |       |        |                               | 74,025 Sleep Apnea                    | -0.02 (0.006)          | 9.30x10 <sup>-5</sup>  |
|                          |             |             |             |               |       |        |                               | 74,025 BMI                            | -0.02 (0.006)          | 1.01x10 <sup>-4</sup>  |
|                          |             |             |             |               |       |        |                               | 71,091 Depression                     | -0.02 (0.006)          | 9.86x10 <sup>-5</sup>  |
|                          |             |             |             |               |       |        |                               | 74,025 Psychiatric Medication         | -0.02 (0.006)          | 9.52x10 <sup>-5</sup>  |
|                          |             |             |             |               |       |        |                               | 73,931 SES                            | -0.02 (0.006)          | 1.41x10 <sup>-4</sup>  |
|                          |             |             |             |               |       |        |                               | 73,840 Smoking                        | -0.02 (0.006)          | 1.43x10 <sup>-4</sup>  |
|                          |             |             |             |               |       |        |                               | 73,476 Employment Status              | -0.02 (0.006)          | 7.71x10 <sup>-5</sup>  |
|                          |             |             |             |               |       |        |                               | 68,261 Marital Status                 | -0.02 (0.006)          | 4.63x10 <sup>-5</sup>  |
|                          |             |             |             |               |       |        |                               | 69,190 Snoring                        | -0.02 (0.006)          | 6.76x10 <sup>-5</sup>  |
|                          | rs1380703   | 2           | 57,941,287  | G/A           | 0.893 | 0.382  | 59,469                        | -                                     | -0.02 (0.006)          | 7.63x10 <sup>-4</sup>  |
|                          |             |             |             |               |       |        |                               | 59,469 Sleep Apnea                    | -0.02 (0.006)          | 7.65x10 <sup>-4</sup>  |
|                          |             |             |             |               |       |        |                               | 59,469 BMI                            | -0.02 (0.006)          | 7.51x10 <sup>-4</sup>  |
|                          |             |             |             |               |       |        |                               | 57,073 Depression                     | -0.02 (0.007)          | 1.39x10 <sup>-3</sup>  |
|                          |             |             |             |               |       |        |                               | 59,469 Psychiatric Medication         | -0.02 (0.006)          | 8.13x10 <sup>-4</sup>  |
|                          |             |             |             |               |       |        |                               | 59,395 SES                            | -0.02 (0.006)          | 8.00x10 <sup>-4</sup>  |
|                          |             |             |             |               |       |        |                               | 59,309 Smoking                        | -0.02 (0.006)          | 6.07x10 <sup>-4</sup>  |
|                          |             |             |             |               |       |        |                               | 59,021 Employment Status              | -0.02 (0.006)          | 1.06x10 <sup>-3</sup>  |
|                          |             |             |             |               |       |        |                               | 54,837 Marital Status                 | -0.02 (0.007)          | 1.16x10 <sup>-3</sup>  |
|                          |             |             |             |               |       |        |                               | 55,524 Snoring                        | -0.03 (0.007)          | 1.23x10 <sup>-4</sup>  |
|                          | rs146977851 | 10          | 56,570,954  | T/C           | 0.965 | 0.029  | 74,893                        | -                                     | -0.05 (0.017)          | 4.85x10 <sup>-3</sup>  |
|                          |             |             |             |               |       |        |                               | 74,893 Sleep Apnea                    | -0.05 (0.017)          | 4.85x10 <sup>-3</sup>  |
|                          |             |             |             |               |       |        |                               | 74,893 BMI                            | -0.05 (0.017)          | 4.80x10 <sup>-3</sup>  |
|                          |             |             |             |               |       |        |                               | 71,922 Depression                     | -0.05 (0.017)          | 4.53x10 <sup>-3</sup>  |
|                          |             |             |             |               |       |        |                               | 74,893 Psychiatric Medication         | -0.05 (0.017)          | 5.39x10 <sup>-3</sup>  |
|                          |             |             |             |               |       |        |                               | 74,798 SES                            | -0.05 (0.017)          | 3.96x10 <sup>-3</sup>  |
|                          |             |             |             |               |       |        |                               | 74,710 Smoking                        | -0.05 (0.017)          | 6.39x10 <sup>-3</sup>  |
|                          |             |             |             |               |       |        |                               | 74,337 Employment Status              | -0.05 (0.017)          | 2.72x10 <sup>-3</sup>  |
|                          |             |             |             |               |       |        |                               | 69,082 Marital Status                 | -0.05 (0.018)          | 5.00x10 <sup>-3</sup>  |
|                          |             |             |             |               |       |        |                               | 70,000 Snoring                        | -0.05 (0.018)          | 9.95x10 <sup>-3</sup>  |
|                          | rs61980273  | 14          | 94,218,949  | A/G           | 1.000 | 0.039  | 75,476                        | -                                     | 0.06 (0.014)           | 9.85x10 <sup>-6</sup>  |
|                          |             |             |             |               |       |        |                               | 75,476 Sleep Apnea                    | 0.06 (0.014)           | 1.00x10 <sup>-5</sup>  |
|                          |             |             |             |               |       |        |                               | 75,476 BMI                            | 0.06 (0.014)           | 9.96x10 <sup>-6</sup>  |
|                          |             |             |             |               |       |        |                               | 72,481 Depression                     | 0.06 (0.014)           | 4.03x10 <sup>-5</sup>  |
|                          |             |             |             |               |       |        |                               | 75,476 Psychiatric Medication         | 0.06 (0.014)           | 1.01x10 <sup>-5</sup>  |
|                          |             |             |             |               |       |        |                               | 75,381 SES                            | 0.06 (0.014)           | 1.05x10 <sup>-5</sup>  |
|                          |             |             |             |               |       |        |                               | 75,291 Smoking                        | 0.06 (0.014)           | 1.37x10 <sup>-5</sup>  |
|                          |             |             |             |               |       |        |                               | 74,917 Employment Status              | 0.06 (0.014)           | 2.86x10 <sup>-5</sup>  |
|                          |             |             |             |               |       |        |                               | 69,617 Marital Status                 | 0.07 (0.015)           | 3.94x10 <sup>-6</sup>  |
|                          |             |             |             |               |       |        |                               | 70,549 Snoring                        | 0.06 (0.015)           | 4.91x10 <sup>-5</sup>  |
| rs62158211               | 2           | 114,106,139 | T/G         | 0.992         | 0.214 | 74,729 | -                             | 0.04 (0.007)                          | 2.89x10 <sup>-10</sup> |                        |
|                          |             |             |             |               |       |        | 74,729 Sleep Apnea            | 0.04 (0.007)                          | 2.91x10 <sup>-10</sup> |                        |
|                          |             |             |             |               |       |        | 74,729 BMI                    | 0.04 (0.007)                          | 2.73x10 <sup>-10</sup> |                        |
|                          |             |             |             |               |       |        | 71,761 Depression             | 0.04 (0.007)                          | 1.65x10 <sup>-10</sup> |                        |
|                          |             |             |             |               |       |        | 74,729 Psychiatric Medication | 0.04 (0.007)                          | 2.66x10 <sup>-10</sup> |                        |
|                          |             |             |             |               |       |        | 74,635 SES                    | 0.04 (0.007)                          | 4.06x10 <sup>-10</sup> |                        |
|                          |             |             |             |               |       |        | 74,548 Smoking                | 0.04 (0.007)                          | 3.70x10 <sup>-10</sup> |                        |
|                          |             |             |             |               |       |        | 74,179 Employment Status      | 0.04 (0.007)                          | 2.07x10 <sup>-10</sup> |                        |
|                          |             |             |             |               |       |        | 68,927 Marital Status         | 0.04 (0.007)                          | 4.03x10 <sup>-10</sup> |                        |
|                          |             |             |             |               |       |        | 69,852 Snoring                | 0.04 (0.007)                          | 1.15x10 <sup>-9</sup>  |                        |
| <b>Insomnia Symptoms</b> | rs113851554 | 2           | 66,750,564  | T/G           | 1.000 | 0.056  | 39,812                        | -                                     | OR [95%CI]             | P                      |
|                          |             |             |             |               |       |        |                               | 39,812 Sleep Apnea                    | 1.27 [1.19-1.35]       | 1.39x10 <sup>-13</sup> |
|                          |             |             |             |               |       |        |                               | 39,812 BMI                            | 1.27 [1.19-1.35]       | 1.47x10 <sup>-13</sup> |
|                          |             |             |             |               |       |        |                               | 38,278 Depression                     | 1.27 [1.19-1.35]       | 1.50x10 <sup>-13</sup> |
|                          |             |             |             |               |       |        |                               | 39,812 Psychiatric Medication         | 1.29 [1.21-1.38]       | 4.73x10 <sup>-14</sup> |
|                          |             |             |             |               |       |        |                               | 39,759 SES                            | 1.27 [1.19-1.35]       | 1.55x10 <sup>-13</sup> |
|                          |             |             |             |               |       |        |                               | 39,704 Smoking                        | 1.27 [1.20-1.36]       | 8.49x10 <sup>-14</sup> |
|                          |             |             |             |               |       |        |                               | 39,527 Employment Status              | 1.27 [1.19-1.35]       | 1.87x10 <sup>-13</sup> |
|                          |             |             |             |               |       |        |                               | 39,527 Employment Status              | 1.27 [1.19-1.35]       | 1.88x10 <sup>-13</sup> |
|                          |             |             |             |               |       |        |                               | 36,595 Marital Status                 | 1.26 [1.18-1.35]       | 7.14x10 <sup>-12</sup> |
|                          |             |             |             |               |       |        |                               | 37,180 Snoring                        | 1.27 [1.19-1.36]       | 6.33x10 <sup>-13</sup> |

|             |                        |                  |                       |       |       |             |                        |                  |                       |       |       |        |             |                  |                       |
|-------------|------------------------|------------------|-----------------------|-------|-------|-------------|------------------------|------------------|-----------------------|-------|-------|--------|-------------|------------------|-----------------------|
| rs145258459 | 17                     | 32,986,155       | T/C                   | 0.695 | 0.017 | 38,305      | -                      | 0.71 [0.60-0.82] | 1.17x10 <sup>-5</sup> |       |       |        |             |                  |                       |
|             |                        |                  |                       |       |       | 38,305      | Sleep Apnea            | 0.70 [0.60-0.82] | 1.13x10 <sup>-5</sup> |       |       |        |             |                  |                       |
|             |                        |                  |                       |       |       | 38,305      | BMI                    | 0.70 [0.60-0.82] | 1.08x10 <sup>-5</sup> |       |       |        |             |                  |                       |
|             |                        |                  |                       |       |       | 36,825      | Depression             | 0.72 [0.62-0.85] | 1.20x10 <sup>-4</sup> |       |       |        |             |                  |                       |
|             |                        |                  |                       |       |       | 38,305      | Psychiatric Medication | 0.70 [0.60-0.82] | 9.58x10 <sup>-6</sup> |       |       |        |             |                  |                       |
|             |                        |                  |                       |       |       | 38,254      | SES                    | 0.70 [0.60-0.82] | 9.43x10 <sup>-6</sup> |       |       |        |             |                  |                       |
|             |                        |                  |                       |       |       | 38,202      | Smoking                | 0.71 [0.60-0.83] | 1.54x10 <sup>-5</sup> |       |       |        |             |                  |                       |
|             |                        |                  |                       |       |       | 38,030      | Employment Status      | 0.70 [0.60-0.82] | 8.94x10 <sup>-6</sup> |       |       |        |             |                  |                       |
|             |                        |                  |                       |       |       | 35,200      | Marital Status         | 0.69 [0.59-0.81] | 8.74x10 <sup>-6</sup> |       |       |        |             |                  |                       |
|             |                        |                  |                       |       |       | 35,764      | Snoring                | 0.74 [0.63-0.87] | 3.01x10 <sup>-4</sup> |       |       |        |             |                  |                       |
|             |                        |                  |                       |       |       | rs376775068 | 8                      | 145,604,659      | C/G                   | 0.672 | 0.066 | 32,923 | -           | 0.85 [0.77-0.92] | 2.05x10 <sup>-4</sup> |
|             |                        |                  |                       |       |       |             |                        |                  |                       |       |       | 32,923 | Sleep Apnea | 0.85 [0.77-0.92] | 2.27x10 <sup>-4</sup> |
| 32,923      | BMI                    | 0.85 [0.78-0.93] | 2.61x10 <sup>-4</sup> |       |       |             |                        |                  |                       |       |       |        |             |                  |                       |
| 31,660      | Depression             | 0.84 [0.77-0.92] | 2.75x10 <sup>-4</sup> |       |       |             |                        |                  |                       |       |       |        |             |                  |                       |
| 32,923      | Psychiatric Medication | 0.85 [0.77-0.92] | 2.23x10 <sup>-4</sup> |       |       |             |                        |                  |                       |       |       |        |             |                  |                       |
| 32,880      | SES                    | 0.85 [0.78-0.93] | 4.01x10 <sup>-4</sup> |       |       |             |                        |                  |                       |       |       |        |             |                  |                       |
| 32,824      | Smoking                | 0.85 [0.78-0.93] | 2.77x10 <sup>-4</sup> |       |       |             |                        |                  |                       |       |       |        |             |                  |                       |
| 32,684      | Employment Status      | 0.85 [0.78-0.93] | 2.92x10 <sup>-4</sup> |       |       |             |                        |                  |                       |       |       |        |             |                  |                       |
| 30,256      | Marital Status         | 0.85 [0.78-0.93] | 6.22x10 <sup>-4</sup> |       |       |             |                        |                  |                       |       |       |        |             |                  |                       |
| 30,751      | Snoring                | 0.85 [0.77-0.93] | 3.83x10 <sup>-4</sup> |       |       |             |                        |                  |                       |       |       |        |             |                  |                       |
| rs531814036 | 17                     | 43,219,921       | C/CT                  | 0.911 | 0.420 |             |                        |                  |                       |       |       | 32,086 | -           | 1.08 [1.04-1.11] | 6.86x10 <sup>-6</sup> |
|             |                        |                  |                       |       |       |             |                        |                  |                       |       |       | 32,086 | Sleep Apnea | 1.08 [1.04-1.11] | 6.51x10 <sup>-6</sup> |
|             |                        |                  |                       |       |       | 32,086      | BMI                    | 1.08 [1.04-1.11] | 8.42x10 <sup>-6</sup> |       |       |        |             |                  |                       |
|             |                        |                  |                       |       |       | 30,839      | Depression             | 1.08 [1.04-1.12] | 2.47x10 <sup>-5</sup> |       |       |        |             |                  |                       |
|             |                        |                  |                       |       |       | 32,086      | Psychiatric Medication | 1.08 [1.04-1.11] | 7.58x10 <sup>-6</sup> |       |       |        |             |                  |                       |
|             |                        |                  |                       |       |       | 32,043      | SES                    | 1.08 [1.04-1.12] | 5.43x10 <sup>-6</sup> |       |       |        |             |                  |                       |
|             |                        |                  |                       |       |       | 32,002      | Smoking                | 1.08 [1.04-1.11] | 1.81x10 <sup>-5</sup> |       |       |        |             |                  |                       |
|             |                        |                  |                       |       |       | 31,868      | Employment Status      | 1.08 [1.04-1.11] | 8.59x10 <sup>-6</sup> |       |       |        |             |                  |                       |
|             |                        |                  |                       |       |       | 29,491      | Marital Status         | 1.08 [1.04-1.12] | 2.08x10 <sup>-5</sup> |       |       |        |             |                  |                       |
|             |                        |                  |                       |       |       | 29,976      | Snoring                | 1.07 [1.03-1.11] | 1.08x10 <sup>-4</sup> |       |       |        |             |                  |                       |
|             |                        |                  |                       |       |       | rs576106307 | 1                      | 18,007,282       | CT/C                  | 0.893 | 0.212 | 33,570 | -           | 0.91 [0.87-0.95] | 2.30x10 <sup>-6</sup> |
|             |                        |                  |                       |       |       |             |                        |                  |                       |       |       | 33,570 | Sleep Apnea | 0.91 [0.87-0.95] | 2.35x10 <sup>-6</sup> |
| 33,570      | BMI                    | 0.91 [0.87-0.95] | 2.89x10 <sup>-6</sup> |       |       |             |                        |                  |                       |       |       |        |             |                  |                       |
| 32,266      | Depression             | 0.92 [0.88-0.96] | 4.72x10 <sup>-5</sup> |       |       |             |                        |                  |                       |       |       |        |             |                  |                       |
| 33,570      | Psychiatric Medication | 0.91 [0.87-0.95] | 2.37x10 <sup>-6</sup> |       |       |             |                        |                  |                       |       |       |        |             |                  |                       |
| 33,526      | SES                    | 0.91 [0.88-0.95] | 8.30x10 <sup>-6</sup> |       |       |             |                        |                  |                       |       |       |        |             |                  |                       |
| 33,477      | Smoking                | 0.91 [0.87-0.95] | 3.40x10 <sup>-6</sup> |       |       |             |                        |                  |                       |       |       |        |             |                  |                       |
| 33,330      | Employment Status      | 0.91 [0.87-0.95] | 4.06x10 <sup>-6</sup> |       |       |             |                        |                  |                       |       |       |        |             |                  |                       |
| 30,887      | Marital Status         | 0.92 [0.87-0.96] | 6.37x10 <sup>-6</sup> |       |       |             |                        |                  |                       |       |       |        |             |                  |                       |
| 31,325      | Snoring                | 0.91 [0.87-0.95] | 3.37x10 <sup>-6</sup> |       |       |             |                        |                  |                       |       |       |        |             |                  |                       |
| rs5922858   | X                      | 82,971,008       | G/T                   | 0.992 | 0.849 |             |                        |                  |                       |       |       | 39,512 | -           | 0.88 [0.84-0.92] | 1.29x10 <sup>-7</sup> |
|             |                        |                  |                       |       |       |             |                        |                  |                       |       |       | 39,512 | Sleep Apnea | 0.88 [0.84-0.92] | 1.34x10 <sup>-7</sup> |
|             |                        |                  |                       |       |       | 39,512      | BMI                    | 0.88 [0.84-0.92] | 1.17x10 <sup>-7</sup> |       |       |        |             |                  |                       |
|             |                        |                  |                       |       |       | 37,990      | Depression             | 0.88 [0.84-0.92] | 1.84x10 <sup>-7</sup> |       |       |        |             |                  |                       |
|             |                        |                  |                       |       |       | 39,512      | Psychiatric Medication | 0.88 [0.84-0.92] | 1.07x10 <sup>-7</sup> |       |       |        |             |                  |                       |
|             |                        |                  |                       |       |       | 39,459      | SES                    | 0.88 [0.84-0.92] | 1.84x10 <sup>-7</sup> |       |       |        |             |                  |                       |
|             |                        |                  |                       |       |       | 39,406      | Smoking                | 0.88 [0.84-0.93] | 1.88x10 <sup>-7</sup> |       |       |        |             |                  |                       |
|             |                        |                  |                       |       |       | 39,233      | Employment Status      | 0.88 [0.84-0.92] | 4.70x10 <sup>-8</sup> |       |       |        |             |                  |                       |
|             |                        |                  |                       |       |       | 36,325      | Marital Status         | 0.88 [0.84-0.93] | 5.46x10 <sup>-7</sup> |       |       |        |             |                  |                       |
|             |                        |                  |                       |       |       | 36,899      | Snoring                | 0.87 [0.83-0.92] | 4.57x10 <sup>-8</sup> |       |       |        |             |                  |                       |

**Excessive Daytime Sleepiness**

|             |   |             |     |       |       |        |                        | <b>Beta (SE)</b> | <b>P</b>              |
|-------------|---|-------------|-----|-------|-------|--------|------------------------|------------------|-----------------------|
| rs115320831 | 4 | 159,178,375 | A/G | 0.981 | 0.298 | 73,280 | -                      | -0.01 (0.003)    | 1.96x10 <sup>-5</sup> |
|             |   |             |     |       |       | 73,280 | Sleep Apnea            | -0.01 (0.003)    | 2.41x10 <sup>-5</sup> |
|             |   |             |     |       |       | 73,280 | BMI                    | -0.01 (0.003)    | 1.90x10 <sup>-5</sup> |
|             |   |             |     |       |       | 70,364 | Depression             | -0.01 (0.003)    | 3.39x10 <sup>-5</sup> |
|             |   |             |     |       |       | 73,280 | Psychiatric Medication | -0.01 (0.003)    | 2.13x10 <sup>-5</sup> |
|             |   |             |     |       |       | 73,186 | SES                    | -0.01 (0.003)    | 2.88x10 <sup>-5</sup> |
|             |   |             |     |       |       | 73,102 | Smoking                | -0.01 (0.003)    | 2.54x10 <sup>-5</sup> |
|             |   |             |     |       |       | 72,739 | Employment Status      | -0.01 (0.003)    | 1.01x10 <sup>-5</sup> |
|             |   |             |     |       |       | 67,586 | Marital Status         | -0.01 (0.003)    | 3.07x10 <sup>-5</sup> |
|             |   |             |     |       |       | 68,526 | Snoring                | -0.01 (0.003)    | 5.24x10 <sup>-5</sup> |

|             |    |             |       |       |       |                               |               |                       |
|-------------|----|-------------|-------|-------|-------|-------------------------------|---------------|-----------------------|
| rs17507216  | 15 | 83,226,925  | A/G   | 1.000 | 0.232 | 75,639 -                      | 0.01 (0.003)  | 4.87x10 <sup>-6</sup> |
|             |    |             |       |       |       | 75,639 Sleep Apnea            | 0.01 (0.003)  | 4.58x10 <sup>-6</sup> |
|             |    |             |       |       |       | 75,639 BMI                    | 0.01 (0.003)  | 4.00x10 <sup>-6</sup> |
|             |    |             |       |       |       | 72,624 Depression             | 0.01 (0.003)  | 5.38x10 <sup>-5</sup> |
|             |    |             |       |       |       | 75,639 Psychiatric Medication | 0.01 (0.003)  | 5.27x10 <sup>-6</sup> |
|             |    |             |       |       |       | 75,544 SES                    | 0.01 (0.003)  | 3.68x10 <sup>-6</sup> |
|             |    |             |       |       |       | 75,451 Smoking                | 0.01 (0.003)  | 4.08x10 <sup>-6</sup> |
|             |    |             |       |       |       | 75,079 Employment Status      | 0.01 (0.003)  | 1.54x10 <sup>-6</sup> |
|             |    |             |       |       |       | 69,749 Marital Status         | 0.02 (0.003)  | 1.86x10 <sup>-6</sup> |
|             |    |             |       |       |       | 70,711 Snoring                | 0.02 (0.003)  | 1.56x10 <sup>-6</sup> |
| rs189689339 | 6  | 82,375,372  | T/C   | 0.664 | 0.004 | 74,733 -                      | 0.06 (0.032)  | 4.71x10 <sup>-2</sup> |
|             |    |             |       |       |       | 74,733 Sleep Apnea            | 0.06 (0.032)  | 4.80x10 <sup>-2</sup> |
|             |    |             |       |       |       | 74,733 BMI                    | 0.06 (0.032)  | 4.36x10 <sup>-2</sup> |
|             |    |             |       |       |       | 71,756 Depression             | 0.06 (0.033)  | 8.69x10 <sup>-2</sup> |
|             |    |             |       |       |       | 74,733 Psychiatric Medication | 0.06 (0.032)  | 4.59x10 <sup>-2</sup> |
|             |    |             |       |       |       | 74,640 SES                    | 0.07 (0.032)  | 3.28x10 <sup>-2</sup> |
|             |    |             |       |       |       | 74,549 Smoking                | 0.06 (0.032)  | 4.68x10 <sup>-2</sup> |
|             |    |             |       |       |       | 74,180 Employment Status      | 0.07 (0.032)  | 4.21x10 <sup>-2</sup> |
|             |    |             |       |       |       | 68,927 Marital Status         | 0.06 (0.033)  | 5.33x10 <sup>-2</sup> |
|             |    |             |       |       |       | 69,864 Snoring                | 0.07 (0.033)  | 3.26x10 <sup>-2</sup> |
| rs192315283 | 1  | 59,531,543  | C/T   | 0.757 | 0.010 | 74,322 -                      | 0.06 (0.016)  | 7.77x10 <sup>-5</sup> |
|             |    |             |       |       |       | 74,322 Sleep Apnea            | 0.07 (0.016)  | 6.10x10 <sup>-5</sup> |
|             |    |             |       |       |       | 74,322 BMI                    | 0.07 (0.016)  | 6.24x10 <sup>-5</sup> |
|             |    |             |       |       |       | 71,360 Depression             | 0.07 (0.017)  | 2.65x10 <sup>-5</sup> |
|             |    |             |       |       |       | 74,322 Psychiatric Medication | 0.07 (0.016)  | 7.04x10 <sup>-5</sup> |
|             |    |             |       |       |       | 74,229 SES                    | 0.06 (0.016)  | 9.01x10 <sup>-5</sup> |
|             |    |             |       |       |       | 74,140 Smoking                | 0.07 (0.016)  | 5.17x10 <sup>-5</sup> |
|             |    |             |       |       |       | 73,775 Employment Status      | 0.07 (0.016)  | 5.10x10 <sup>-5</sup> |
|             |    |             |       |       |       | 68,530 Marital Status         | 0.06 (0.017)  | 1.53x10 <sup>-4</sup> |
|             |    |             |       |       |       | 69,478 Snoring                | 0.05 (0.017)  | 2.14x10 <sup>-3</sup> |
| rs35309287  | 5  | 146,775,386 | T/T A | 0.937 | 0.030 | 74,463 -                      | -0.03 (0.008) | 8.14x10 <sup>-5</sup> |
|             |    |             |       |       |       | 74,463 Sleep Apnea            | -0.03 (0.008) | 7.20x10 <sup>-5</sup> |
|             |    |             |       |       |       | 74,463 BMI                    | -0.03 (0.008) | 8.03x10 <sup>-5</sup> |
|             |    |             |       |       |       | 71,491 Depression             | -0.03 (0.008) | 2.89x10 <sup>-4</sup> |
|             |    |             |       |       |       | 74,463 Psychiatric Medication | -0.03 (0.008) | 8.64x10 <sup>-5</sup> |
|             |    |             |       |       |       | 74,368 SES                    | -0.03 (0.008) | 1.31x10 <sup>-4</sup> |
|             |    |             |       |       |       | 74,277 Smoking                | -0.03 (0.008) | 5.67x10 <sup>-5</sup> |
|             |    |             |       |       |       | 73,912 Employment Status      | -0.03 (0.008) | 1.35x10 <sup>-4</sup> |
|             |    |             |       |       |       | 68,658 Marital Status         | -0.03 (0.008) | 9.41x10 <sup>-4</sup> |
|             |    |             |       |       |       | 69,614 Snoring                | -0.03 (0.008) | 6.32x10 <sup>-4</sup> |
| rs76645968  | 2  | 53,827,686  | C/G   | 0.990 | 0.023 | 75,463 -                      | -0.03 (0.008) | 1.87x10 <sup>-4</sup> |
|             |    |             |       |       |       | 75,463 Sleep Apnea            | -0.03 (0.008) | 2.18x10 <sup>-4</sup> |
|             |    |             |       |       |       | 75,463 BMI                    | -0.03 (0.008) | 1.72x10 <sup>-4</sup> |
|             |    |             |       |       |       | 72,456 Depression             | -0.03 (0.008) | 2.90x10 <sup>-4</sup> |
|             |    |             |       |       |       | 75,463 Psychiatric Medication | -0.03 (0.008) | 1.74x10 <sup>-4</sup> |
|             |    |             |       |       |       | 75,368 SES                    | -0.03 (0.008) | 2.08x10 <sup>-4</sup> |
|             |    |             |       |       |       | 75,277 Smoking                | -0.03 (0.008) | 1.56x10 <sup>-4</sup> |
|             |    |             |       |       |       | 74,905 Employment Status      | -0.03 (0.008) | 1.56x10 <sup>-4</sup> |
|             |    |             |       |       |       | 69,586 Marital Status         | -0.03 (0.009) | 2.63x10 <sup>-4</sup> |
|             |    |             |       |       |       | 70,550 Snoring                | -0.03 (0.009) | 4.09x10 <sup>-4</sup> |
| rs920065    | 3  | 5,893,776   | C/G   | 0.957 | 0.176 | 71,634 -                      | -0.02 (0.003) | 3.47x10 <sup>-6</sup> |
|             |    |             |       |       |       | 71,634 Sleep Apnea            | -0.02 (0.003) | 3.04x10 <sup>-6</sup> |
|             |    |             |       |       |       | 71,634 BMI                    | -0.02 (0.003) | 2.53x10 <sup>-6</sup> |
|             |    |             |       |       |       | 68,787 Depression             | -0.02 (0.003) | 5.25x10 <sup>-6</sup> |
|             |    |             |       |       |       | 71,634 Psychiatric Medication | -0.02 (0.003) | 3.37x10 <sup>-6</sup> |
|             |    |             |       |       |       | 71,546 SES                    | -0.02 (0.003) | 1.75x10 <sup>-6</sup> |
|             |    |             |       |       |       | 71,455 Smoking                | -0.02 (0.003) | 3.21x10 <sup>-6</sup> |
|             |    |             |       |       |       | 71,111 Employment Status      | -0.02 (0.003) | 1.55x10 <sup>-6</sup> |
|             |    |             |       |       |       | 66,056 Marital Status         | -0.01 (0.004) | 2.46x10 <sup>-4</sup> |
|             |    |             |       |       |       | 66,941 Snoring                | -0.02 (0.004) | 4.00x10 <sup>-6</sup> |

|             |    |             |     |       |       |        |                        |              |                       |
|-------------|----|-------------|-----|-------|-------|--------|------------------------|--------------|-----------------------|
| rs182765975 | 3  | 78,538,431  | T/G | 0.855 | 0.003 | 75,312 | -                      | 0.08 (0.022) | 3.34x10 <sup>-4</sup> |
|             |    |             |     |       |       | 75,312 | Sleep Apnea            | 0.08 (0.022) | 3.46x10 <sup>-4</sup> |
|             |    |             |     |       |       | 75,312 | BMI                    | 0.08 (0.022) | 3.00x10 <sup>-4</sup> |
|             |    |             |     |       |       | 72,310 | Depression             | 0.08 (0.022) | 2.18x10 <sup>-4</sup> |
|             |    |             |     |       |       | 75,312 | Psychiatric Medication | 0.08 (0.022) | 3.38x10 <sup>-4</sup> |
|             |    |             |     |       |       | 75,217 | SES                    | 0.08 (0.022) | 4.79x10 <sup>-4</sup> |
|             |    |             |     |       |       | 75,124 | Smoking                | 0.08 (0.022) | 3.08x10 <sup>-4</sup> |
|             |    |             |     |       |       | 74,754 | Employment Status      | 0.08 (0.022) | 2.13x10 <sup>-4</sup> |
|             |    |             |     |       |       | 69,453 | Marital Status         | 0.07 (0.023) | 1.35x10 <sup>-3</sup> |
|             |    |             |     |       |       | 70,409 | Snoring                | 0.08 (0.022) | 2.85x10 <sup>-4</sup> |
| rs142261172 | 12 | 126,049,981 | A/G | 0.915 | 0.004 | 75,355 | -                      | 0.11 (0.019) | 6.05x10 <sup>-9</sup> |
|             |    |             |     |       |       | 75,355 | Sleep Apnea            | 0.11 (0.019) | 7.79x10 <sup>-9</sup> |
|             |    |             |     |       |       | 75,355 | BMI                    | 0.11 (0.019) | 7.05x10 <sup>-9</sup> |
|             |    |             |     |       |       | 72,353 | Depression             | 0.12 (0.019) | 1.65x10 <sup>-9</sup> |
|             |    |             |     |       |       | 75,355 | Psychiatric Medication | 0.11 (0.019) | 6.15x10 <sup>-9</sup> |
|             |    |             |     |       |       | 75,261 | SES                    | 0.11 (0.019) | 1.09x10 <sup>-8</sup> |
|             |    |             |     |       |       | 75,167 | Smoking                | 0.11 (0.019) | 3.25x10 <sup>-9</sup> |
|             |    |             |     |       |       | 74,796 | Employment Status      | 0.11 (0.019) | 7.51x10 <sup>-9</sup> |
|             |    |             |     |       |       | 69,483 | Marital Status         | 0.11 (0.020) | 1.13x10 <sup>-8</sup> |
|             |    |             |     |       |       | 70,449 | Snoring                | 0.11 (0.020) | 4.38x10 <sup>-8</sup> |
| rs73536079  | X  | 67,154,206  | T/G | 0.903 | 0.003 | 75,583 | -                      | 0.74 (0.147) | 4.88x10 <sup>-7</sup> |
|             |    |             |     |       |       | 75,583 | Sleep Apnea            | 0.74 (0.146) | 4.71x10 <sup>-7</sup> |
|             |    |             |     |       |       | 75,583 | BMI                    | 0.75 (0.146) | 3.34x10 <sup>-7</sup> |
|             |    |             |     |       |       | 72,572 | Depression             | 0.73 (0.145) | 4.51x10 <sup>-7</sup> |
|             |    |             |     |       |       | 75,583 | Psychiatric Medication | 0.74 (0.146) | 4.67x10 <sup>-7</sup> |
|             |    |             |     |       |       | 75,488 | SES                    | 0.74 (0.146) | 3.87x10 <sup>-7</sup> |
|             |    |             |     |       |       | 75,395 | Smoking                | 0.74 (0.146) | 4.62x10 <sup>-7</sup> |
|             |    |             |     |       |       | 75,026 | Employment Status      | 0.74 (0.146) | 4.71x10 <sup>-7</sup> |
|             |    |             |     |       |       | 69,697 | Marital Status         | 0.75 (0.153) | 9.54x10 <sup>-7</sup> |
|             |    |             |     |       |       | 70,659 | Snoring                | 0.73 (0.145) | 4.50x10 <sup>-7</sup> |

Sleep trait GWAS results are adjusted for age, sex, genetic ancestry, and genotyping array as baseline and additional covariates as indicated for each analysis. All analyses performed in subjects with non-missing covariates, therefore unadjusted results may differ from table 1. E=effect allele, A=alternative allele, MAF=minor allele frequency, SE=standard error.



Supplementary Table 5. Description of candidate genes within association signals and *In silico* functional interpretation using variant annotations (Haploreg 4.1)

| SNP                      | Chr:position<br>NCBI 37 | Nearest<br>Gene(s) | Candidate genes                                                                                                                                                                                                                                                                                                                                                                                                                                                                                                                                                                                                                                                                                                                                                                                                                                                                                                                                                                                                                                                                                                                                                                                                                                            | In silico functional assessment (Haploreg 4.1)                                                                                                                                                                                                                                                                                                                                                                                                                                                                                                                                                                                                                                                                                                                                                                              |
|--------------------------|-------------------------|--------------------|------------------------------------------------------------------------------------------------------------------------------------------------------------------------------------------------------------------------------------------------------------------------------------------------------------------------------------------------------------------------------------------------------------------------------------------------------------------------------------------------------------------------------------------------------------------------------------------------------------------------------------------------------------------------------------------------------------------------------------------------------------------------------------------------------------------------------------------------------------------------------------------------------------------------------------------------------------------------------------------------------------------------------------------------------------------------------------------------------------------------------------------------------------------------------------------------------------------------------------------------------------|-----------------------------------------------------------------------------------------------------------------------------------------------------------------------------------------------------------------------------------------------------------------------------------------------------------------------------------------------------------------------------------------------------------------------------------------------------------------------------------------------------------------------------------------------------------------------------------------------------------------------------------------------------------------------------------------------------------------------------------------------------------------------------------------------------------------------------|
| <b>Sleep duration</b>    |                         |                    |                                                                                                                                                                                                                                                                                                                                                                                                                                                                                                                                                                                                                                                                                                                                                                                                                                                                                                                                                                                                                                                                                                                                                                                                                                                            |                                                                                                                                                                                                                                                                                                                                                                                                                                                                                                                                                                                                                                                                                                                                                                                                                             |
| rs62158211               | 2:114106139             | PAX8               | This lead SNP is in strong LD with the CHARGE multi-ethnic sleep duration signal (rs1823125 $r^2=0.95$ , $D'=0.98$ in 1KG CEU). The locus contains 6 genes under the peak ( <i>IL1RN</i> , <i>PSD4</i> , <i>PAX8</i> , <i>PAX8-AS1</i> , <i>IGKV1OR2-108</i> , <i>AC016745.3</i> , <i>CBWD2</i> , <i>FOXD4L1</i> ). <i>IL1RN</i> encodes interleukin 1 Receptor antagonist, and is upregulated in sleep-deprived mice. <i>PSD4</i> , Pleckstrin And Sec7 Domain Containing 4, is a guanine exchange factor for the RAS superfamily protein Arf6 that helps to assemble and stabilize tight junctions. <i>PAX-8</i> , paired-box 8 is a thyroid and kidney specific nuclear paired box homeodomain transcription factor involved in thyroid development. <i>IGKV1OR2-108</i> is an immunoglobulin kappa variable gene segment. <i>CBWD2</i> is a family member of the cobalamin synthetase W domain proteins, <i>FOXD4L1</i> is a neural forkhead box transcription factor that expands neural ectoderm by repressing genes that promote onset of neural differentiation, and upregulating genes that maintain immature proliferative neural precursors. <i>AC016745.3</i> is a poorly characterized lincRNA with increased expression in recurrent glioma. | This region is adjacent to the head to head fusion site at chr 2q13-q14.1 that formed chromosome 2 during human evolution from hominids. Eqtl peaks are observed at the lead GWAS SNP for widely expressed gene <i>AC016745.3</i> (thyroid, adrenal gland and skin), widely expressed <i>CBWD2</i> (thyroid), <i>IGKV1OR2108</i> (thyroid and skin) and <i>FOXD4L1</i> (thyroid; gTEX consortium) with lower gene expression for the sleep duration increasing allele. Eqtl of lead SNPs for <i>PAX-8</i> were also reported by the CHARGE Consortium. The lead SNPs are also associated with ratios of metabolites C3:1/C16:0H acylcarnitine to hydroxyacylcarnitine ratio ( $p=10^{-8}$ ), C3:1 involved in energy metabolism, and serum ratio of (linoleamide (18:2n6))/(stearidonate (18:4n3)) $p=1.5 \times 10^{-6}$ . |
| rs1380703                | 2:57941287              | VRK2               | This locus is between annotated genes <i>SNORD78</i> (169kb) and <i>VRK2</i> (332kb). <i>SNORD78</i> codes for a small nucleolar RNA upregulated in lung and prostate cancer. <i>VRK2</i> encodes the protein vaccinia related kinase 2, a serine/threonine kinase and modulator of ERK/MAPK and CREB-regulated pathways. Independent variants at the <i>VRK2</i> locus have previously been associated with schizophrenia and epilepsy (rs13026414 $r^2=0.34$ , $D'=0.89$ ; rs11682175 $r^2=0.40$ , $D'=0.82$ ) and conditional analysis suggests that they are not associated with sleep duration. Rare variants have been identified in a family with bipolar disorder (PMD: 24348429). Pseudogenes in the locus include <i>LOC100131953</i> .                                                                                                                                                                                                                                                                                                                                                                                                                                                                                                          | <i>VRK2</i> is widely expressed, with greatest expression in gTEX in EBV-transformed lymphocytes. The lead SNP is common but has no known SNPs in LD; the alternate allele is predicted to abolish Tregulatory cell specifying FoxP3 binding, enhance binding of the important pluripotency transcription factor Nanog and reduce binding of <i>POU2F2</i> (OCT2) and TATA. No enhancer or promoter elements are predicted.                                                                                                                                                                                                                                                                                                                                                                                                 |
| rs10953765               | 7:114291435             | FOXP2              | This locus contains 3 genes, <i>FOXP2</i> , <i>MIR3666</i> and <i>MDFIC</i> . <i>FOXP2</i> encodes the forkhead box P2 protein and mutations cause developmental speech and language disorders in humans. <i>MIR3666</i> lies within an intron of <i>FOXP2</i> . <i>MDFIC</i> encodes for the MyoD family inhibitor protein that has a cysteine rich C terminal domain important for transcriptional regulation of viral gene expression. Notably, an intronic SNP in <i>MDFIC</i> was associated with clozapine induced cell death in lymphoblastoid cell lines (rs2709505 $r^2=0.009$ , $D'=0.36$ to our lead SNP).                                                                                                                                                                                                                                                                                                                                                                                                                                                                                                                                                                                                                                      | The lead SNP lies within an intron of <i>FOXP2</i> and alters binding of TATA-binding protein, with the sleep duration reducing allele showing enhanced binding. Notably, a correlated variant is highly conserved and the alternate allele decreases binding of zinc finger protein Zfp128 and enhances binding of Zfp161.                                                                                                                                                                                                                                                                                                                                                                                                                                                                                                 |
| rs146977851              | 10:56570954             | PCDH15             | There is one gene at the locus, <i>PCDH15</i> which encodes for protocadherin-related 15, a member of the cadherin superfamily involved in generating neural diversity for neuronal differentiation and synapse formation. It has previously been linked to hearing loss (Usher syndrome) and may be disrupted in neuropsychiatric disorders such as autism and schizophrenia.                                                                                                                                                                                                                                                                                                                                                                                                                                                                                                                                                                                                                                                                                                                                                                                                                                                                             | The lead SNP alters binding sites for 12 proteins, with most dramatic differential effects by allele for binding of <i>FOXP1</i> , <i>FOXQ1</i> , <i>POU3f2_2</i> and <i>Sox6</i> transcription factors.                                                                                                                                                                                                                                                                                                                                                                                                                                                                                                                                                                                                                    |
| rs61980273               | 14:94218949             | PRIMA1             | This locus contains the genes <i>UNC79</i> ( <i>unc-79 homolog (C. elegans)</i> ), <i>PRIMA1</i> ( <i>proline rich membrane anchor 1</i> ), <i>FAM181A</i> and <i>FAM181A-AS1</i> and <i>ASB2</i> ( <i>ankyrin repeat and SOCS box containing 2</i> ). <i>Unc79</i> is a calcium channel previously implicated in circadian rhythms and sleep-wake regulation in <i>Drosophila</i> . <i>PRIMA1</i> encodes for proline rich membrane anchor 1, organizes acetylcholinesterase into tetramers to tether it to neuronal membranes. A previously reported SNP in the gene has been implicated in a GWAS study of caffeine related sleep disturbance (rs6575353 $r^2=0.003$ , $D'=1$ to our lead SNP; $P>10^{-6}$ ) unadjusted for insomnia.                                                                                                                                                                                                                                                                                                                                                                                                                                                                                                                   | The SNP lies within <i>PRIMA1</i> and demonstrates a promoter mark in mesenchymal stem cells, enhancer marks in multiple brain regions, muscle and intestines, and the alternate allele is predicted to reduce binding of <i>AP-2</i> , a transcription factor expressed in neural crest cells, and slightly enhance binding of <i>BDP1</i> .                                                                                                                                                                                                                                                                                                                                                                                                                                                                               |
| <b>Insomnia Symptoms</b> |                         |                    |                                                                                                                                                                                                                                                                                                                                                                                                                                                                                                                                                                                                                                                                                                                                                                                                                                                                                                                                                                                                                                                                                                                                                                                                                                                            |                                                                                                                                                                                                                                                                                                                                                                                                                                                                                                                                                                                                                                                                                                                                                                                                                             |
| rs576106307              | 1:18007282              | ARHGEF10L          | <i>ARHGEF10L</i> encodes Rho guanine nucleotide exchange factor 10 like and may be involved in cerebral visual impairment. <i>ACTL8</i> encodes actin-like 8, <i>RCC2</i> encodes Regulator of chromosome condensation-2 that may be involved in directional cell signaling                                                                                                                                                                                                                                                                                                                                                                                                                                                                                                                                                                                                                                                                                                                                                                                                                                                                                                                                                                                | This variant is not present in the 1KG reference database.                                                                                                                                                                                                                                                                                                                                                                                                                                                                                                                                                                                                                                                                                                                                                                  |
| rs113851554              | 2:66750564              | MEIS1              | <i>MEIS1</i> is a homeodomain protein important for stem cell self-renewal, and plays important roles in the development of the brain and heart. It has a role in motor neuron connectivity in <i>Drosophila</i> , retinal and lens development in mouse, and Substance P expression in the amygdala.                                                                                                                                                                                                                                                                                                                                                                                                                                                                                                                                                                                                                                                                                                                                                                                                                                                                                                                                                      | This variant is highly conserved, and acts as an enhancer in multiple cell lines including hematopoietic cells, smooth muscle, lung, pancreas and liver. The most highly correlated variant is an enhancer in stem cells, fetal heart, adrenal gland and the rare allele is predicted to dramatically reduce binding of <i>REST</i> . In zebrafish, the enhancer element encompassing this variant has an enhancer role.                                                                                                                                                                                                                                                                                                                                                                                                    |
| rs376775068              | 8:145604659             | ADCK5              | <i>ADCK5</i> encodes AarF Domain Containing Kinase 5 on chr 1q24.3.                                                                                                                                                                                                                                                                                                                                                                                                                                                                                                                                                                                                                                                                                                                                                                                                                                                                                                                                                                                                                                                                                                                                                                                        | This variant is not present in the 1KG reference database.                                                                                                                                                                                                                                                                                                                                                                                                                                                                                                                                                                                                                                                                                                                                                                  |

|                           |             |             |                          |                                                                                                                                                                                                                                                                                                                                                                                                                                                                                                                                                                                                                                                                                                                                                                                                                                                                                                                                                                                                                                                                                                                                                                                             |                                                                                                                                                                                                                                                                                                                                                                                                                                                                                                                                                                                       |
|---------------------------|-------------|-------------|--------------------------|---------------------------------------------------------------------------------------------------------------------------------------------------------------------------------------------------------------------------------------------------------------------------------------------------------------------------------------------------------------------------------------------------------------------------------------------------------------------------------------------------------------------------------------------------------------------------------------------------------------------------------------------------------------------------------------------------------------------------------------------------------------------------------------------------------------------------------------------------------------------------------------------------------------------------------------------------------------------------------------------------------------------------------------------------------------------------------------------------------------------------------------------------------------------------------------------|---------------------------------------------------------------------------------------------------------------------------------------------------------------------------------------------------------------------------------------------------------------------------------------------------------------------------------------------------------------------------------------------------------------------------------------------------------------------------------------------------------------------------------------------------------------------------------------|
|                           | rs145258459 | 17:32986155 | <i>TMEM132E</i>          | TMEM132 family members are important in neuronal development, this gene has been implicated in autosomal-recessive nonsyndromic hearing loss. The gene family has roles in panic/anxiety disorder, and bipolar disorder.                                                                                                                                                                                                                                                                                                                                                                                                                                                                                                                                                                                                                                                                                                                                                                                                                                                                                                                                                                    | This variant is 20kb downstream of the gene, conserved (GERP), has enhancer marks in the brain and GI tissues, has DNA hypersensitivity sites in induced pluripotent stem cells, brain and GI.                                                                                                                                                                                                                                                                                                                                                                                        |
|                           | rs531814036 | 17:43219921 | <i>ACBD4</i>             | This region harbors the genes <i>DCAKD</i> , <i>NMT1</i> , <i>PLCD3</i> , <i>ACBD4</i> , <i>HEXIM1</i> , <i>HEXIM2</i> , <i>FMNL1</i> , <i>MAP3K14</i> , <i>MAP3K14-AS1</i> , <i>SPATA32</i> . <i>ACBD4</i> encodes an acyl-CoA binding domain containing protein involved in maintenance of Golgi structure and transport.                                                                                                                                                                                                                                                                                                                                                                                                                                                                                                                                                                                                                                                                                                                                                                                                                                                                 | This variant is not present in the 1KG reference database.                                                                                                                                                                                                                                                                                                                                                                                                                                                                                                                            |
| Males                     | rs13192566  | 6:169961635 | <i>WDR27</i>             | This region comprises the genes <i>THBS2</i> , <i>WDR27</i> , <i>C6orf120</i> , <i>PHF10</i> , <i>TCTE3</i> , <i>ERMARD</i> , <i>LINC00242</i> and <i>LINC00574</i> . <i>WDR27</i> encodes a WD repeat containing protein, the family of which can act as a scaffold for protein-protein interactions important for cell signaling. Variants around this gene have been implicated in multiple human diseases including type 1 diabetes.                                                                                                                                                                                                                                                                                                                                                                                                                                                                                                                                                                                                                                                                                                                                                    | The lead SNP and correlated variant are in <i>WDR27</i> and are predicted to alter binding sites for multiple transcription factors, but little else is known.                                                                                                                                                                                                                                                                                                                                                                                                                        |
| Females                   | rs3792900   | 5:135393754 | <i>TGFBI</i>             | This region harbors the genes <i>SLC25A48</i> ( <i>solute carrier family 25 member 48</i> ), <i>IL9</i> (interleukin 9), <i>FBXL21</i> (F-box and leucine rich repeat protein 21 (gene/pseudogene)), <i>LECT2</i> (leukocyte cell derived chemotaxin 2), <i>TGFBI</i> (transforming growth factor beta induced), <i>VTRNA2-1</i> , <i>SMAD5</i> ( <i>SMAD</i> family member 5), <i>SMAD5-AS1</i> , <i>LOC389332</i> , <i>TRPC7</i> (transient receptor potential cation channel subfamily C member 7). <i>TGFBI</i> encodes the TGF-beta induced gene, an extracellular matrix protein responsible for human corneal dystrophy and that may act as a tumor suppressor gene.                                                                                                                                                                                                                                                                                                                                                                                                                                                                                                                 | There are many SNPs in this region that might be causal, with slightly greater probability for the lead SNP using PICS. The lead SNP is in an enhancer and binds CTCF in many cell types, is an expression-qtI for <i>SMAD5</i> in monocytes ( $p=10^{-9}$ ) and for <i>SMAD5</i> ( $p=10^{-30}$ ) and <i>TGFBI</i> ( $p=10^{-6}$ ) in whole blood and alters transcription factor binding sites for <i>E2A</i> , <i>TBX5</i> and <i>ZEB1</i> .                                                                                                                                       |
| <b>Daytime Sleepiness</b> |             |             |                          |                                                                                                                                                                                                                                                                                                                                                                                                                                                                                                                                                                                                                                                                                                                                                                                                                                                                                                                                                                                                                                                                                                                                                                                             |                                                                                                                                                                                                                                                                                                                                                                                                                                                                                                                                                                                       |
|                           | rs192315283 | 1:59531543  | <i>HSD52</i>             | This region contains genes for non-coding RNAs <i>LINC01135</i> , <i>LINC01358</i> , uncharacterized predicted protein <i>HSD52</i> , <i>JUN</i> proto-oncogene, <i>AP-1</i> transcription factor subunit, <i>MYSM1</i> , <i>Myb</i> like, <i>SWIRM</i> and <i>MPN</i> domains 1 protein, and <i>FGGY</i> , a carbohydrate kinase domain containing protein, that phosphorylates carbohydrates. Variants in <i>FGGY</i> have been irreproducibly associated with <i>ALS</i> .                                                                                                                                                                                                                                                                                                                                                                                                                                                                                                                                                                                                                                                                                                               | The lead SNP is predicted to be the likely causal variant, and is downstream of <i>HSD52</i> . It is highly conserved and is within an enhancer element in ES cells, blood and GI tissues, altering transcription factor binding sites for <i>Ets</i> .                                                                                                                                                                                                                                                                                                                               |
|                           | rs76645968  | 2:53827686  | <i>ASB3</i>              | This region harbors genes <i>ASB3</i> , <i>GPR75-ASB3</i> , <i>CHAC2</i> , <i>GPR75</i> , <i>ERLEC1</i> , <i>MIR3682</i> and <i>PSME4</i> . <i>ASB3</i> encodes an ankyrin repeat and SOCS box containing protein. The SOCs box may couple suppressor of cytokine signaling proteins to elongin complexes for degradation. This region has been previously implicated in responsiveness to short-acting beta-2 agonists in asthma and is associated with smooth muscle proliferation. <i>GPR75-ASB3</i> is the product of a read-through transcript and the encoded protein is identical to <i>ASB3</i> with a novel N-terminus from <i>GPR75</i> . <i>GPR75</i> is a G-protein coupled receptor. <i>CHAC2</i> encodes a cation transport regulator homolog and the family may act as $\gamma$ -glutamyl cyclotransferases that degrade glutathione. <i>ERLEC1</i> encodes an endoplasmic reticulum lectin that functions in N-glycan recognition, and may function as a regulator of protein degradation and multiple cellular stress response pathways. <i>MIR3682</i> is a microRNA of unknown function. <i>PSME4</i> encodes the proteasome activator subunit 4 involved in DNA repair. | The lead SNP is within <i>ASB3</i> , and has 25% probability to be the causal SNP based on PICS analysis. It is in a region of enhancer histone marks in the brain, gastrointestinal tissues and in the pancreas. The SNP is predicted to alter a binding site for <i>NRSF/REST</i> , a neuron-restrictive silencing factor important for the establishing of neuronal specificity, by being expressed in non-neuronal and neuronal lineages. A correlated SNP is a trans-qtI SNP, associated with gene expression of <i>LRP5L</i> , located on chr22, in peripheral blood monocytes. |
|                           | rs920065    | 3:5893776   | <i>MRPS35P1/MRPS36P1</i> | <i>MRPS35P1</i> and <i>MRPS36P1</i> are mitochondrial ribosomal protein <i>S35</i> and <i>S36</i> pseudogenes.                                                                                                                                                                                                                                                                                                                                                                                                                                                                                                                                                                                                                                                                                                                                                                                                                                                                                                                                                                                                                                                                              | There are two SNPs in strong LD, both lead SNPs alter transcription factor binding sites for multiple transcription factors, most predominantly interferon regulatory factor for <i>rs920065</i> and forkhead transcription factor <i>Foxf2</i> for <i>rs5846411</i> , that is expressed predominantly in the lung and placenta.                                                                                                                                                                                                                                                      |
|                           | rs115320831 | 4:159178375 | <i>TMEM144</i>           | This region harbors poorly characterized genes <i>FAM198B</i> and transmembrane domain protein <i>TMEM144</i> , as well as <i>relaxin/insulin</i> like peptide receptor 1 ( <i>RFXP1</i> ), a G-protein coupled receptor. <i>RFXP1</i> has been dysregulated in multiple diseases including bipolar disorder, stroke and cancer, is implicated in stress response, and also plays critical roles in spermatogenesis, pregnancy and birth as a receptor for <i>relaxin</i> . In zebrafish, it plays an important role in neurophysiology during early development                                                                                                                                                                                                                                                                                                                                                                                                                                                                                                                                                                                                                            | The lead SNP lies 1.8kb 3' of the gene <i>TMEM144</i> , and is predicted to most strongly alter binding of <i>FOXP1</i> and <i>SIX5</i> transcription factors. A correlated variant is also predicted to alter <i>FOXP1</i> and <i>Pou3f3</i> binding.                                                                                                                                                                                                                                                                                                                                |
|                           | rs35309287  | 5:146775386 | <i>DPYSL3</i>            | This region contains genes <i>STK32A</i> , <i>DPYSL3</i> , <i>JAKMIP2-AS1</i> , <i>JAKMIP2</i> . <i>DPYSL3</i> encodes a dihydropyrimidinase like protein implicated as a tumor suppressor and <i>ALS</i> gene, and regulates the inflammatory response of activated microglia. <i>STK32A</i> encodes a serine/threonine kinase. <i>JAKMIP2</i> is janus kinase and microtubule interacting protein 2, component of the Golgi matrix, and may be a scaffold or repress secretory processes.                                                                                                                                                                                                                                                                                                                                                                                                                                                                                                                                                                                                                                                                                                 | Two variants could be causal by PICS credible set analysis, and are 1bp apart, suggesting that they might reflect the same insertion-deletion polymorphism. Both variants are predicted to lie in an enhancer site active in ES cell derived ectodermal cells, fat, ovary, heart and lung and alter binding sites for multiple transcription factors, most strongly for <i>PAX-6</i> , lead variant, and <i>GATA</i> for the correlated variant.                                                                                                                                      |
|                           | rs189689339 | 6:82375372  | <i>FAM46A</i>            | This region contains the <i>Fam46a</i> gene that has been implicated in retinal diseases, is thought to be a poly-A polymerase, is enriched in Hct cells, with variants associated with posterior cortical atrophy variant of Alzheimer's disease. Mutations in mice cause skeletal dysplasia.                                                                                                                                                                                                                                                                                                                                                                                                                                                                                                                                                                                                                                                                                                                                                                                                                                                                                              | The lead variant is predicted to be causal and significantly alter binding of <i>SREBP1</i> and <i>p300</i> .                                                                                                                                                                                                                                                                                                                                                                                                                                                                         |

|                          |             |              |                 |                                                                                                                                                                                                                                                                                                                                                                                                                                                                                                                                                                                                                                                                                                                                                                                                                                          |                                                                                                                                                                                                                                                                                                                                                                                                                                                                                                                                                                                                                                                                                          |
|--------------------------|-------------|--------------|-----------------|------------------------------------------------------------------------------------------------------------------------------------------------------------------------------------------------------------------------------------------------------------------------------------------------------------------------------------------------------------------------------------------------------------------------------------------------------------------------------------------------------------------------------------------------------------------------------------------------------------------------------------------------------------------------------------------------------------------------------------------------------------------------------------------------------------------------------------------|------------------------------------------------------------------------------------------------------------------------------------------------------------------------------------------------------------------------------------------------------------------------------------------------------------------------------------------------------------------------------------------------------------------------------------------------------------------------------------------------------------------------------------------------------------------------------------------------------------------------------------------------------------------------------------------|
|                          | rs17507216  | 15:83226925  | <i>CPEB1</i>    | This region harbors multiple genes including <i>GOLGA6L10</i> (golgin A6 family-like 10), <i>ADAMTS7P1</i> ( <i>ADAMTS7</i> pseudogene 1), <i>UBE2O2P2</i> , <i>RPS17</i> (ribosomal protein S17), <i>CPEB1</i> (cytoplasmic polyadenylation element binding protein 1), <i>AP3B2</i> (adaptor related protein complex 3 beta 2 subunit), <i>SNHG21</i> (small nucleolar RNA host gene 21), <i>SCARNA15</i> (small Cajal body-specific RNA 15), <i>FSD2</i> (fibronectin type III and SPRY domain containing 2), <i>WHAMM</i> (WAS protein homolog associated with actin, golgi membranes and microtubules), <i>HOMER2</i> (homer homolog 2 <i>Drosophila</i> ). <i>CPEB1</i> regulates subcellular trafficking and translation of synaptic plasticity-related mRNAs, and may play a role in diurnal trafficking of mRNAs in astrocytes. | There are multiple SNPs that might be causal, and lie in the genes RP11-152F13.10 or CPEB1. The lead SNP is predicted to be an enhancer in ES cell derived endoderm and brain regions including the angular gyrus and it and associated SNPs form an eQTL peak for multiple genes (most strongly AP3B2, but also genes RP13-608F4.1, RP11-152F13.10, RP11-152F13.7, AC105339.1 and EFTUD1) in adipose tissue, aorta, cerebellum, breast, fibroblasts, colon, esophagus, heart, lung, muscle, skin, stomach, thyroid and whole blood. The SNP rs17356118 in strong LD is conserved, predicted to be a strong enhancer in multiple tissues and alters the glucocorticoid response element. |
| adj for depression       | rs182765975 | 3:78538431   | <i>ROBO1</i>    | <i>ROBO1</i> encodes the roundabout guidance receptor 1 and is a neuronal axon guidance receptor previously implicated in dyslexia.                                                                                                                                                                                                                                                                                                                                                                                                                                                                                                                                                                                                                                                                                                      | Little functional annotation is available for the three variants predicted to have highest probability for causality. While the lead variant is not predicted to alter transcription factor binding sites, the other two SNPs may alter multiple transcription factor binding sites including most strongly for NKX2.2 and NKX2.3 for variant rs191435135.                                                                                                                                                                                                                                                                                                                               |
| adj for BMI              | rs142261172 | 12:126049981 | <i>TMEM132B</i> | <i>TMEM132B</i> is a <i>TMEM132</i> family member involved in brain development that is differentially expressed in intracranial aneurysm.                                                                                                                                                                                                                                                                                                                                                                                                                                                                                                                                                                                                                                                                                               | Both correlated SNPs have equal probability of being causal. The lead SNP activates a glucocorticoid response element, and has DNAase hypersensitivity sites in the blood, while the correlated SNP is predicted to be an enhancer in the brain and has DNA hypersensitivity sites in the brain.                                                                                                                                                                                                                                                                                                                                                                                         |
| <b>Multi-sleep trait</b> |             |              |                 |                                                                                                                                                                                                                                                                                                                                                                                                                                                                                                                                                                                                                                                                                                                                                                                                                                          |                                                                                                                                                                                                                                                                                                                                                                                                                                                                                                                                                                                                                                                                                          |
|                          | rs12140153  | 1:62352479   | <i>INADL</i>    | This region harbors <i>TM2D1</i> (TM2 domain containing 1), <i>L1TD1</i> (LINE1 type transposase domain containing 1), <i>KANK4</i> (KN motif and ankyrin repeat domains 4), <i>USP1</i> (ubiquitin specific peptidase 1), <i>DOCK7</i> (dedicator of cytokinesis 7) and <i>INADL</i> . <i>INADL</i> encodes PATJ, a crumbs cell polarity complex component, with multiple PDZ domains. It organizes multimeric complexes at the plasma membrane and localizes to tight junctions. Variants in <i>INADL</i> have previously been associated with obesity.                                                                                                                                                                                                                                                                                | The lead SNP is predicted to be causal and is a conserved missense SNP, that is predicted to be probably damaging by Polyphen and deleterious by SIFT. It is predicted to be a missense variant in all four transcripts (Transcript ENST00000316485 p.G1573V, ENST00000371158 G1543V, ENST00000543708 p.G357V, and ENST00000545929, p.G188V). Further, it might slightly alter transcription-factor binding and have a regulatory role.                                                                                                                                                                                                                                                  |
|                          | rs3122163   | 6:55164327   | <i>HCRTR2</i>   | This region harbors the orexin receptor, <i>HCRTR2</i> , a G-protein coupled receptor involved in sleep-wake regulation and regulation of feeding behavior.                                                                                                                                                                                                                                                                                                                                                                                                                                                                                                                                                                                                                                                                              | Multiple SNPs in this region may be causal, and while the lead SNP is not well annotated, a correlated SNP rs9475186 is predicted to be within a strong bivalent promoter and alter transcription factor binding of ETS transcription factor which has roles in immune system and cancer.                                                                                                                                                                                                                                                                                                                                                                                                |

Supplementary Table 6. Disease associated gene sets enriched in candidate genes from sleep duration, insomnia symptoms, and excessive daytime sleepiness genes loci.

| Trait                        | Disease Gene Set               | Genes                                              | Fold Enrichment | $P_{Adjusted}$ |
|------------------------------|--------------------------------|----------------------------------------------------|-----------------|----------------|
| Sleep Duration               | Nelson syndrome                | <i>IL36B,RABL2A,FOXD4L1,PSD4,IL36G,IL36A</i>       | 12.02           | 6.04E-05       |
|                              | Communication Disorders        | <i>FOXP2,PCDH15</i>                                | 23.24           | 6.80E-03       |
|                              | Williams Syndrome              | <i>RABL2A,FOXD4L1,PSD4</i>                         | 8.77            | 8.70E-03       |
| Insomnia Symptom             | Virus Diseases                 | <i>CCL7,NMT1,VPS28,PLCD3,GPT,HEXIM1,CCL8,CCL1</i>  | 10.88           | 2.91E-05       |
|                              | Bronchitis                     | <i>CCL13,CCL7,CCDC103,CCL11,CCL8,CCL1</i>          | 16.8            | 2.91E-05       |
|                              | Sexually Transmitted Diseases  | <i>CCL7,NMT1,VPS28,GFAP,PLCD3,HEXIM1,CCL11</i>     | 12.32           | 2.91E-05       |
|                              | Brenner tumour of ovary        | <i>CCL13,CCL7,GFAP,CCL11,CCL8,CCL1</i>             | 17.93           | 2.91E-05       |
|                              | Immunologic Deficiency Syndrom | <i>CCL7,NMT1,VPS28,GFAP,PLCD3,HEXIM1</i>           | 15.29           | 2.00E-04       |
|                              | HIV Infections                 | <i>CCL7,NMT1,VPS28,GFAP,PLCD3,HEXIM1</i>           | 9.33            | 2.00E-04       |
|                              | Retroviridae Infections        | <i>CCL7,NMT1,VPS28,GFAP,PLCD3,HEXIM1</i>           | 7.65            | 2.00E-04       |
|                              | HIV                            | <i>CCL7,NMT1,VPS28,GFAP,PLCD3,HEXIM1,CCL8,CCL1</i> | 7.03            | 2.00E-04       |
|                              | Lentivirus Infections          | <i>CCL7,NMT1,VPS28,GFAP,PLCD3,HEXIM1</i>           | 10.62           | 2.00E-04       |
|                              | Inflammation                   | <i>CCL13,CCL7,MAP3K14,CCL11,CCL8,CCL1</i>          | 9.15            | 3.00E-04       |
|                              | Sclerosis                      | <i>PADI3,GFAP,PADI4,PADI6</i>                      | 13.82           | 9.00E-04       |
|                              | Multiple Sclerosis             | <i>PADI3,GFAP,PADI4,PADI6</i>                      | 12.06           | 1.30E-03       |
|                              | Rheumatoid Arthritis           | <i>PADI3,GFAP,PADI4,PADI6</i>                      | 10.05           | 2.90E-03       |
|                              | Osteosarcoma                   | <i>CCL7,RECQL4,CCL8</i>                            | 15.55           | 3.70E-03       |
|                              | Werner Syndrome                | <i>RECQL4,CCDC103</i>                              | 41.47           | 3.90E-03       |
|                              | Myoclonus                      | <i>GFAP,MEIS1</i>                                  | 27.65           | 8.00E-03       |
| Excessive Daytime Sleepiness | Diamond-Blackfan Anemia        | <i>HOMER2,RPS17</i>                                | 103.05          | 1.60E-03       |

Enrichment was tested using WebGestat<sup>66</sup> from a list of genes in each association signal for the primary analysis for each trait, boundaries of the association signal are defined by 400kb windows around each SNP. Categories containing at least two different loci were included.

Supplementary Table 7. Transcription factor binding site enrichment in candidate sleep duration, insomnia symptoms, and excessive daytime sleepiness genes from significant loci.

| <b>Trait</b>                 | <b>Transcription Factor</b> | <b>Fold Enrichment</b> | <b>Adjusted P-value</b> | <b>Genes</b>                       |
|------------------------------|-----------------------------|------------------------|-------------------------|------------------------------------|
| Sleep Duration               | <i>HSF1</i>                 | 12.22                  | 1.00E-02                | <i>FOXP2, MDFIC, UNC79, IL36RN</i> |
| Insomnia Symptom             | <i>MIF1 (HERPUD1)</i>       | 31.59                  | 9.00E-04                | <i>CCDC103, BOP1, EFTUD2, HSF1</i> |
| Excessive Daytime Sleepiness | <i>MEF2 (V\$AMEF2_Q6)</i>   | 16.37                  | 2.64E-02                | <i>JUN, PPP2R2B, FAM46A</i>        |

Enrichment was tested using WebGestalt<sup>66</sup> from a list of genes in each association signal, boundaries of the association signal are defined by SNPs with pairwise linkage disequilibrium ( $r^2$ )  $\geq 0.20$ .



Supplementary Table 8. Replication in UK Biobank of genetic variants previously reported to be associated with sleep duration, insomnia symptoms, or excessive daytime sleepiness

| Trait                               | SNP        | Gene          | Chr:position<br>NCBI 37 | Alleles (E/A) | Imputation<br>Quality | MAF   | Beta (SE)                  | p-val     | Bonferroni<br>corrected<br>p-val | Meta Analysis<br>p-val | First author, Year | PMID     | Original Trait                          |
|-------------------------------------|------------|---------------|-------------------------|---------------|-----------------------|-------|----------------------------|-----------|----------------------------------|------------------------|--------------------|----------|-----------------------------------------|
| <b>Sleep Duration</b>               |            |               |                         |               |                       |       |                            |           |                                  |                        |                    |          |                                         |
|                                     | rs11932595 | CLOCK         | 4:56323597              | G/A           | 1.00                  | 0.399 | -0.001 (0.004)             | 0.822     | 1                                | 0.952                  | Allebrandt, 2010   | 20149345 | Sleep Duration                          |
|                                     | rs12649507 | CLOCK         | 4:56380484              | A/G           | 1.00                  | 0.305 | 0.00 (0.005)               | 0.982     | 1                                | 0.747                  |                    |          | Sleep Duration                          |
|                                     | rs11046205 | ABCC9         | 12:21992326             | A/G           | 0.99                  | 0.184 | -0.001 (0.005)             | 0.801     | 1                                | 0.422                  | Allebrandt, 2013   | 22105623 | Sleep Duration                          |
|                                     | rs4780805  | TMC5          | 16:19404645             | G/A           | 0.98                  | 0.144 | 0.003 (0.006)              | 0.591     | 1                                | 0.219                  | Byrne, 2013        | 23728906 | Sleep Duration                          |
|                                     | rs11214607 | DRD2          | 11:113312139            | G/T           | 0.97                  | 0.159 | 0.013 (0.006)              | 0.025     | 0.48                             | 8.451E-05              | Cade, 2015         | 26464489 | Sleep Duration                          |
|                                     | rs17601612 | DRD2          | 11:113317745            | C/G           | 0.99                  | 0.383 | -0.014 (0.004)             | 1.406E-03 | <b>0.027</b>                     | 5.435E-07              |                    |          | Sleep Duration                          |
|                                     | rs6599077  | MYRIP         | 3:40096618              | A/G           | 1.00                  | 0.279 | -0.001 (0.005)             | 0.809     | 1                                | -                      | Gottlieb, 2007*    | 17903308 | Sleep Duration                          |
|                                     | rs1823125  | PAX-8         | 2:114090412             | G/A           | 1.00                  | 0.219 | 0.038 (0.005)              | 9.953E-14 | <b>1.89E-12</b>                  | 1.852E-22              | Gottlieb, 2014     | 25469926 | Sleep Duration                          |
|                                     | rs1191685  | PAX-8         | 2:114094984             | G/C           | 1.00                  | 0.410 | -0.020 (0.004)             | 2.508E-06 | <b>4.77E-05</b>                  | 4.616E-13              |                    |          | Sleep Duration                          |
|                                     | rs4587207  | IER3/DDR1     | 6:30766945              | G/A           | 1.00                  | 0.140 | -0.006 (0.006)             | 0.320     | 1                                | 1.040E-04              |                    |          | Sleep Duration                          |
|                                     | rs10914351 | PTPRU         | 1:30234031              | T/G           | 1.00                  | 0.021 | 0.029 (0.015)              | 0.047     | 1                                | 0.012                  | Oillia, 2014       | 25109461 | Sleep Duration                          |
|                                     | rs1037079  | PCDH7/CENTD1  | 4:32590048              | T/C           | 0.98                  | 0.044 | -0.024 (0.010)             | 0.021     | 0.40                             | 0.079                  |                    |          | Sleep Duration                          |
|                                     | rs2031573  | KLF6          | 10:4001897              | T/C           | 0.98                  | 0.190 | 0.001 (0.005)              | 0.798     | 1                                | 0.755                  |                    |          | Sleep Duration                          |
|                                     | rs17043459 | DPP10         | 2:115493714             | A/G           | 0.75                  | 0.000 | 0.342 (0.378)              | 0.365     | 1                                | 0.599                  | Scheinfeldt, 2015  | 26333835 | Sleep Duration                          |
|                                     | rs16900727 | CDH6          | 5:31150659              | C/A           | 0.27                  | 0.000 | -0.401 (0.408)             | 0.326     | 1                                | 0.546                  |                    |          | Sleep Duration                          |
|                                     | rs41463746 | ELOVL         | 6:10983568              | T/C           | 0.13                  | 0.000 | 1.098 (0.989)              | 0.267     | 1                                | 0.135                  |                    |          | Sleep Duration                          |
|                                     | rs17122013 | SORCS1        | 10:108820205            | C/A           | 0.61                  | 0.000 | 0.098 (0.244)              | 0.688     | 1                                | 0.459                  |                    |          | Sleep Duration                          |
|                                     | rs7096948  | FAM204A/PRLHR | 10:120187299            | G/C           | 0.74                  | 0.000 | 0.392 (0.393)              | 0.318     | 1                                | 0.566                  |                    |          | Sleep Duration                          |
|                                     | rs41348446 | ARNTL         | 11:13259561             | A/G           | 0.56                  | 0.000 | <u>0.036 (0.143)</u>       | 0.802     | 1                                | 0.562                  |                    |          | Sleep Duration                          |
| OR (95%CI)                          |            |               |                         |               |                       |       |                            |           |                                  |                        |                    |          |                                         |
| <b>Insomnia Symptoms</b>            |            |               |                         |               |                       |       |                            |           |                                  |                        |                    |          |                                         |
|                                     | rs521704   | GBP1          | 1:89680554              | A/C           | 1.00                  | 0.488 | <u>0.995 [0.973-1.018]</u> | 0.648     | 1                                | 0.208                  | Byrne, 2012        | 22754043 | Caffeine induced insomnia adj for IFS   |
|                                     | rs4822498  | ADORA2A       | 22:24876800             | C/T           | 0.99                  | 0.399 | <u>0.982 [0.959-1.005]</u> | 0.142     | 1                                | 0.050                  |                    | 22754043 | Caffeine induced insomnia               |
|                                     | rs11174478 | SLC2A13       | 12:40354244             | A/G           | 0.98                  | 0.390 | <u>1.001 [0.977-1.024]</u> | 0.963     | 1                                | 0.330                  | Byrne, 2013        | 23728906 | Insomnia Factor Score                   |
|                                     | rs7304986  | CACNA1C       | 12:2438105              | C/T           | 1.00                  | 0.016 | <u>0.989 [0.902-1.084]</u> | 0.912     | 1                                | 0.405                  |                    | 23728906 | Sleep Latency                           |
|                                     | rs2302729  | CACNA1C       | 12:2783972              | C/T           | 0.99                  | 0.168 | <u>1.012 [0.981-1.043]</u> | 0.484     | 1                                | 0.834                  |                    | 23728906 | Insomnia                                |
|                                     | rs1986116  | WNCG          | 14:77513844             | C/T           | 0.99                  | 0.240 | <u>0.989 [0.963-1.016]</u> | 0.315     | 1                                | 0.052                  |                    | 23728906 | Sleep quality                           |
|                                     | rs1823068  | PDE4D         | 5:58676049              | G/A           | 0.97                  | 0.141 | <u>1.033 [0.999-1.067]</u> | 0.057     | 1                                | -                      | Gottlieb, 2007*    | 17903308 | Sleepiness                              |
|                                     | rs1154155  | TRA           | 14:23002684             | G/T           | 1.00                  | 0.151 | <u>1.014 [0.982-1.047]</u> | 0.399     | 1                                | 0.001                  | Hallmayer, 2009    | 19412176 | Narcolepsy                              |
|                                     | rs2858884  | HLA-DQ2       | 6:32700083              | C/A           | 1.00                  | 0.223 | <u>1.001 [0.974-1.029]</u> | 0.936     | 1                                | 0.481                  | Hor, 2010          | 20711174 | Narcolepsy                              |
|                                     | rs16826005 | NCKAP1        | 2:134266001             | G/A           | 1.00                  | 0.040 | <u>1.017 [0.959-1.078]</u> | 0.430     | 1                                | 0.173                  | Peer, 2013         | 23646285 | HLA negative essential hypersomnia      |
|                                     | rs10988217 | CRAT          | 9:131888116             | G/A           | 1.00                  | 0.394 | <u>0.998 [0.975-1.022]</u> | 0.579     | 1                                | 0.811                  |                    | 23646285 | HLA negative essential hypersomnia      |
|                                     | rs11854769 | SPRED1        | 15:38502243             | T/C           | 0.99                  | 0.250 | <u>0.987 [0.961-1.013]</u> | 0.696     | 1                                | 0.880                  |                    | 23646285 | HLA negative essential hypersomnia      |
| Beta (SE)                           |            |               |                         |               |                       |       |                            |           |                                  |                        |                    |          |                                         |
| <b>Excessive Daytime Sleepiness</b> |            |               |                         |               |                       |       |                            |           |                                  |                        |                    |          |                                         |
|                                     | rs1986116  | WNCG          | 14:77513844             | C/T           | 0.99                  | 0.240 | <u>-0.006 (0.005)</u>      | 0.247     | 1                                | 0.065                  | Byrne, 2013        | 23728906 | Sleep quality                           |
|                                     | rs1823068  | PDE4D         | 5:58676049              | G/A           | 0.97                  | 0.141 | <u>0.007 (0.006)</u>       | 0.269     | 1                                | -                      | Gottlieb, 2007*    | 17903308 | Sleepiness                              |
|                                     | rs1154155  | TRA           | 14:23002684             | G/T           | 1.00                  | 0.150 | <u>-0.005 (0.006)</u>      | 0.354     | 1                                | 0.994                  | Hallmayer, 2009    | 19412176 | Narcolepsy                              |
|                                     | rs2858884  | HLA-DQ2       | 6:32700083              | C/A           | 1.00                  | 0.223 | <u>-0.001 (0.005)</u>      | 0.790     | 1                                | 0.408                  | Hor, 2010          | 20711174 | Narcolepsy                              |
|                                     | rs12425451 | TEAD4         | 12:3164923              | T/C           | 0.95                  | 0.277 | <u>-0.003 (0.005)</u>      | 0.504     | 1                                | 0.880                  | Luca, 2013         | 23496005 | Age at onset of cataplexy in narcolepsy |
|                                     | rs16966122 | THEG5         | 19:32158464             | G/A           | 1.00                  | 0.170 | <u>0.005 (0.006)</u>       | 0.360     | 1                                | 0.168                  |                    | 23496005 | ESS                                     |
|                                     | rs2859998  | UBXN2B        | 8:59324162              | A/G           | 1.00                  | 0.299 | <u>-0.005 (0.005)</u>      | 0.240     | 1                                | 0.091                  |                    | 23496005 | Age at onset of EDS in narcolepsy       |
|                                     | rs5770917  | CPT1B         | 22:51017353             | C/T           | 1.00                  | 0.048 | <u>-0.002 (0.01)</u>       | 0.831     | 1                                | 0.811                  | Miyagawa, 2008     | 18820697 | Narcolepsy                              |
|                                     | rs11854769 | SPRED1        | 15:38502243             | T/C           | 0.99                  | 0.249 | <u>0.002 (0.005)</u>       | 0.649     | 1                                | 0.398                  | Peer, 2013         | 23646285 | HLA negative essential hypersomnia      |
|                                     | rs10988217 | CRAT          | 9:131888116             | G/A           | 1.00                  | 0.394 | <u>-0.002 (0.004)</u>      | 0.653     | 1                                | 0.825                  |                    | 23646285 | HLA negative essential hypersomnia      |
|                                     | rs16826005 | NCKAP1        | 2:134266001             | G/A           | 1.00                  | 0.040 | <u>0.018 (0.011)</u>       | 0.097     | 1                                | 0.044                  |                    | 23646285 | HLA negative essential hypersomnia      |

Sleep trait GWAS results are adjusted for age, sex, genetic ancestry, and genotyping array. E=effect allele, A=alternative allele, MAF=minor allele frequency, SE=standard error, PMID=pubmed ID. **Bold indicates Bonferroni corrected p<0.05.** Meta-analysis performed using a sample size weighted approach in METAL. \* indicated the original effect allele was unavailable, therefore Meta analysis was not performed.

Supplementary Table 9. Heritability of sleep duration, insomnia symptoms, and excessive daytime sleepiness partitioned across functional annotation class using LDSC.

| Category                       | Sleep Duration  |       |                 | Insomnia Symptoms |       |                 | Excessive Daytime Sleepiness |       |                 |
|--------------------------------|-----------------|-------|-----------------|-------------------|-------|-----------------|------------------------------|-------|-----------------|
|                                | Fold Enrichment | SE    | <i>p</i> -value | Fold Enrichment   | SE    | <i>p</i> -value | Fold Enrichment              | SE    | <i>p</i> -value |
| 29 mammals conserved           | 14.160          | 4.700 | <b>5.11E-03</b> | 15.052            | 4.189 | <b>7.96E-04</b> | 18.037                       | 4.975 | <b>6.15E-04</b> |
| 29 mammals conserved, extended | 1.761           | 0.306 | 1.27E-02        | 2.023             | 0.309 | <b>9.22E-04</b> | 1.523                        | 0.355 | 1.41E-01        |
| 3-PrimeUTR                     | -2.261          | 3.751 | 3.85E-01        | 3.368             | 3.545 | 5.04E-01        | -0.177                       | 4.339 | 7.86E-01        |
| 3-PrimeUTR, extended           | -1.216          | 1.954 | 2.57E-01        | 1.643             | 1.645 | 6.96E-01        | 0.620                        | 1.928 | 8.44E-01        |
| 5-PrimeUTR                     | -2.651          | 6.903 | 5.97E-01        | 2.428             | 4.887 | 7.70E-01        | 9.022                        | 7.606 | 2.92E-01        |
| 5-PrimeUTR, extended           | -0.687          | 1.662 | 3.10E-01        | 0.415             | 1.558 | 7.07E-01        | 0.578                        | 2.141 | 8.44E-01        |
| Coding                         | 1.433           | 3.943 | 9.12E-01        | 1.076             | 3.601 | 9.83E-01        | 1.880                        | 4.315 | 8.38E-01        |
| Coding, extended               | -1.497          | 1.019 | 1.43E-02        | 0.643             | 0.926 | 7.00E-01        | 0.207                        | 1.116 | 4.77E-01        |
| CTCF                           | -6.797          | 3.688 | 3.45E-02        | -1.885            | 3.389 | 3.95E-01        | -1.526                       | 4.718 | 5.92E-01        |
| CTCF, extended                 | 1.011           | 1.274 | 9.93E-01        | 0.524             | 1.118 | 6.71E-01        | 1.081                        | 1.589 | 9.59E-01        |
| DGF                            | -1.199          | 1.641 | 1.80E-01        | 0.357             | 1.290 | 6.18E-01        | -1.509                       | 1.890 | 1.84E-01        |
| DGF, extended                  | 1.001           | 0.277 | 9.98E-01        | 1.245             | 0.232 | 2.91E-01        | 1.607                        | 0.328 | 6.44E-02        |
| DHS                            | 0.820           | 1.453 | 9.01E-01        | 1.958             | 1.262 | 4.48E-01        | -2.099                       | 1.761 | 7.84E-02        |
| DHS peaks                      | -0.619          | 1.769 | 3.60E-01        | 1.028             | 1.653 | 9.87E-01        | -2.881                       | 2.162 | 7.27E-02        |
| DHS, extended                  | 1.117           | 0.335 | 7.28E-01        | 2.053             | 0.315 | <b>8.39E-04</b> | 1.305                        | 0.406 | 4.52E-01        |
| Enhancer                       | 4.409           | 1.644 | 3.81E-02        | 4.408             | 1.741 | 5.03E-02        | 1.456                        | 2.195 | 8.36E-01        |
| Enhancer, extended             | 2.125           | 0.631 | 7.44E-02        | 2.957             | 0.665 | 3.24E-03        | 0.328                        | 0.936 | 4.73E-01        |
| FetalDHS                       | -2.488          | 2.229 | 1.18E-01        | 3.854             | 1.899 | 1.33E-01        | -0.318                       | 2.545 | 6.04E-01        |
| FetalDHS, extended             | 1.471           | 0.541 | 3.84E-01        | 2.852             | 0.549 | <b>7.37E-04</b> | 1.666                        | 0.699 | 3.41E-01        |
| H3K27ac                        | 1.494           | 0.206 | 1.65E-02        | 1.358             | 0.175 | 4.05E-02        | 0.880                        | 0.232 | 6.04E-01        |
| H3K27ac, extended              | 1.060           | 0.303 | 8.42E-01        | 1.658             | 0.305 | 3.08E-02        | 0.660                        | 0.411 | 4.08E-01        |
| H3K4me1                        | 1.667           | 0.358 | 6.27E-02        | 1.995             | 0.395 | 1.18E-02        | 0.377                        | 0.471 | 1.86E-01        |
| H3K4me1 peaks                  | 3.223           | 1.090 | 4.14E-02        | 3.626             | 1.004 | 8.94E-03        | 0.525                        | 1.355 | 7.26E-01        |
| H3K4me1, extended              | 1.243           | 0.150 | 1.06E-01        | 1.402             | 0.144 | 5.13E-03        | 1.278                        | 0.204 | 1.73E-01        |
| H3K4me3                        | 1.058           | 0.756 | 9.39E-01        | 2.996             | 0.842 | 1.77E-02        | 2.159                        | 1.009 | 2.51E-01        |
| H3K4me3 peaks                  | 0.498           | 2.641 | 8.49E-01        | 5.872             | 2.726 | 7.39E-02        | 4.109                        | 3.243 | 3.38E-01        |
| H3K4me3, extended              | 1.261           | 0.449 | 5.62E-01        | 1.992             | 0.420 | 1.82E-02        | 0.083                        | 0.625 | 1.42E-01        |
| H3K9ac                         | 1.506           | 0.910 | 5.78E-01        | 3.951             | 0.907 | <b>1.15E-03</b> | 1.250                        | 1.191 | 8.33E-01        |
| H3K9ac peaks                   | 0.014           | 2.776 | 7.22E-01        | 3.982             | 2.856 | 2.96E-01        | 5.782                        | 4.013 | 2.33E-01        |
| H3K9ac, extended               | 1.516           | 0.466 | 2.68E-01        | 1.947             | 0.409 | 2.05E-02        | 0.710                        | 0.529 | 5.83E-01        |
| Intron                         | 1.062           | 0.142 | 6.64E-01        | 1.189             | 0.154 | 2.20E-01        | 1.109                        | 0.184 | 5.53E-01        |
| Intron, extended               | 1.126           | 0.128 | 3.24E-01        | 1.019             | 0.115 | 8.70E-01        | 1.273                        | 0.161 | 9.02E-02        |
| Promoter                       | 0.197           | 2.121 | 7.05E-01        | 5.554             | 2.211 | 3.94E-02        | 3.822                        | 2.813 | 3.16E-01        |
| Promoter Flanking              | 3.365           | 6.817 | 7.29E-01        | 9.261             | 5.879 | 1.60E-01        | 3.390                        | 7.954 | 7.64E-01        |
| Promoter Flanking, extended    | 3.433           | 1.933 | 2.08E-01        | 3.538             | 1.859 | 1.72E-01        | 1.043                        | 2.525 | 9.86E-01        |
| Promoter, extended             | 2.388           | 1.298 | 2.85E-01        | 2.875             | 1.186 | 1.14E-01        | 1.337                        | 1.540 | 8.27E-01        |
| Repressed                      | 0.905           | 0.350 | 7.86E-01        | 0.879             | 0.339 | 7.21E-01        | 0.442                        | 0.507 | 2.71E-01        |
| Repressed, extended            | 0.931           | 0.091 | 4.44E-01        | 0.770             | 0.078 | <b>3.28E-03</b> | 0.898                        | 0.119 | 3.90E-01        |
| SuperEnhancer                  | 1.148           | 0.263 | 5.73E-01        | 1.780             | 0.274 | <b>4.38E-03</b> | 1.524                        | 0.338 | 1.21E-01        |
| SuperEnhancer, extended        | 1.285           | 0.238 | 2.30E-01        | 1.433             | 0.255 | 9.03E-02        | 1.582                        | 0.335 | 8.20E-02        |
| TFBS                           | 2.492           | 1.864 | 4.24E-01        | 3.450             | 1.211 | 4.31E-02        | 0.792                        | 1.579 | 8.95E-01        |
| TFBS, extended                 | 1.420           | 0.479 | 3.81E-01        | 1.898             | 0.422 | 3.33E-02        | 1.335                        | 0.576 | 5.61E-01        |
| Transcribed                    | 1.101           | 0.423 | 8.12E-01        | 0.952             | 0.362 | 8.94E-01        | 1.684                        | 0.580 | 2.38E-01        |
| Transcribed, extended          | 0.891           | 0.156 | 4.84E-01        | 1.041             | 0.147 | 7.78E-01        | 1.007                        | 0.158 | 9.64E-01        |
| TSS                            | -5.445          | 3.438 | 6.09E-02        | 4.300             | 3.198 | 3.02E-01        | 7.675                        | 4.255 | 1.17E-01        |
| TSS, extended                  | 3.446           | 1.699 | 1.50E-01        | 5.427             | 1.668 | 7.93E-03        | 2.037                        | 2.206 | 6.38E-01        |
| Weak Enhancer                  | 9.976           | 4.425 | 4.25E-02        | 10.814            | 3.747 | 8.81E-03        | 5.142                        | 4.841 | 3.92E-01        |
| Weak Enhancer, extended        | 3.236           | 1.036 | 3.09E-02        | 3.017             | 0.909 | 2.65E-02        | 0.898                        | 1.300 | 9.37E-01        |

Bold=significant after multiple testing correction. SE=standard error.



Supplementary Table 10. Conditional analysis of the *MEIS1* locus association signal with insomnia symptoms.

|                                  | Chr         | Position hg19 | Baseline    |                    | Adj rs113851554         |                    | Adj rs11693221 |                    | Adj rs2300478          |                    |                         |
|----------------------------------|-------------|---------------|-------------|--------------------|-------------------------|--------------------|----------------|--------------------|------------------------|--------------------|-------------------------|
|                                  |             |               | OR (95% CI) | P                  | OR (95% CI)             | P                  | OR (95% CI)    | P                  | OR (95% CI)            | P                  |                         |
| MEIS1 lead insomnia symptoms SNP | rs113851554 | 2             | 66750564    | 1.26 (1.20 - 1.33) | 9.10 x10 <sup>-19</sup> | -                  | -              | 1.23 (1.12 - 1.36) | 3.01 x10 <sup>-5</sup> | 1.28 (1.21 - 1.35) | 1.27 x10 <sup>-17</sup> |
| MEIS1 lead RLS GWAS SNP          | rs2300478   | 2             | 66781453    | 1.04 (1.01 - 1.06) | 1.04x10 <sup>-2</sup>   | 0.98 (0.95 - 1.01) | 0.24           | 0.99 (0.97 - 1.02) | 0.71                   | -                  | -                       |
| MEIS1 3'UTR RLS associated SNP   | rs11693221  | 2             | 66799986    | 1.26 (1.19 - 1.33) | 5.14 x10 <sup>-15</sup> | 1.03 (0.93 - 1.15) | 0.54           | -                  | -                      | 1.26 (1.19 - 1.34) | 1.35 x10 <sup>-13</sup> |

Conditioning on the lead SNP abolishes the lead regional association signal and shows no strong secondary association signals. Analysis conditional on previously reported RLS GWAS SNP rs2300478 does not alter insomnia symptoms association signals. Analysis conditional on rs11693221, a rare MEIS1 3' UTR SNP discovered by sequence analysis and also associated with RLS, attenuates the lead association signal. Associations are additionally adjusted for age, sex, ancestry PCs, and genotyping array.

Supplementary Table 11. Common genetic variants for restless legs syndrome (RLS) associate with increased insomnia symptoms in the UK Biobank.

| SNP                                                        | CHR | BP         | Gene region               | Alleles (E/A) | Imputation quality | MAF   | Restless Legs Syndrome* | Periodic Limb Movements* | Insomnia Symptoms (n=58,702) | p-val                        |
|------------------------------------------------------------|-----|------------|---------------------------|---------------|--------------------|-------|-------------------------|--------------------------|------------------------------|------------------------------|
|                                                            |     |            |                           |               |                    |       | OR                      | OR                       | OR(95%CI)                    |                              |
| rs113851554 <sup>#</sup>                                   | 2   | 66,750,564 | <i>MEIS1</i>              | T/G           | 1                  | 0.057 | 4.42                    | n/a                      | 1.26 (1.20 - 1.33)           | 9.10 x10 <sup>-19</sup>      |
| rs2300478 <sup>#</sup>                                     | 2   | 66,781,453 | <i>MEIS1</i>              | G/T           | 1                  | 0.252 | 1.68                    | 1.28                     | 1.04 (1.01 - 1.06)           | 1.04x10 <sup>-2</sup>        |
| rs6747972                                                  | 2   | 68,070,225 | <i>intergenic (MEIS1)</i> | A/G           | 1                  | 0.424 | 1.23                    | 1.04                     | 1.02 (1.00 - 1.05)           | 9.67x10 <sup>-2</sup>        |
| rs9357271                                                  | 6   | 38,365,873 | <i>BTBD9</i>              | T/C           | 1                  | 0.209 | 1.47                    | 1.45                     | 1.02 (0.99 - 1.04)           | 0.498                        |
| rs1975197                                                  | 9   | 8,846,955  | <i>PTPRD</i>              | A/G           | 0.98               | 0.179 | 1.29                    | 1.3                      | 1.03 (1.00 - 1.06)           | 8.69x10 <sup>-2</sup>        |
| rs12593813                                                 | 15  | 68,036,852 | <i>MAP2K5/LBXCOR1</i>     | G/A           | 0.98               | 0.322 | 1.41                    | 1.24                     | 1.04 (1.01 - 1.06)           | 4.92x10 <sup>-3</sup>        |
| rs3104767                                                  | 16  | 52,624,738 | <i>TOX3/BC034767</i>      | G/T           | 1                  | 0.411 | 1.33                    | 1.29                     | 1.03 (1.01 - 1.05)           | 6.57x10 <sup>-3</sup>        |
| <b>Weighted Genetic Risk Score RLS</b>                     |     |            |                           |               |                    |       |                         |                          | <b>1.06 (1.05 - 1.07)</b>    | <b>1.17x10<sup>-21</sup></b> |
| <b>Weighted Genetic Risk Score RLS without rs113851554</b> |     |            |                           |               |                    |       |                         |                          | <b>1.03 (1.02 - 1.03)</b>    | <b>8.03x10<sup>-7</sup></b>  |
| <b>Weighted Genetic Risk Score PLM</b>                     |     |            |                           |               |                    |       |                         |                          | <b>1.02 (1.01 - 1.03)</b>    | <b>5.99x10<sup>-6</sup></b>  |

Insomnia symptom GWAS results are adjusted for age, sex, genetic ancestry, and genotyping array. E=effect allele, A=alternative allele, MAF=minor allele frequency, OR=Odds Ratio, CI=confidence interval, \* single SNP effect estimates for Restless leg syndrome and periodic limb movements are from Winkelmann et al., PLoS Genet 2011 and Moore et al. Sleep 2014. #these SNPs represent the same underlying MEIS1 association signal

Supplementary Table 12. Genetic correlation between sleep traits and 20 traits using LD-score regression

| Phenotype               | First author, Year                   | PMID     | Sleep Duration |                 | Insomnia Symptoms |                 | Excessive Daytime Sleepiness |                 |
|-------------------------|--------------------------------------|----------|----------------|-----------------|-------------------|-----------------|------------------------------|-----------------|
|                         |                                      |          | $r_g$          | p-value         | $r_g$             | p-value         | $r_g$                        | p-value         |
| Birth Weight            | Horikoshi, M. <i>et al.</i> , 2013   | 23202124 | <b>-0.270</b>  | <b>7.51E-04</b> | -0.114            | 1.20E-01        | 0.042                        | 6.25E-01        |
| Height                  | Wood, A.R. <i>et al.</i> 2014        | 25282103 | 0.053          | 1.28E-01        | -0.037            | 2.45E-01        | 0.008                        | 7.87E-01        |
| BMI                     | Locke, A.E. <i>et al.</i> , 2015     | 25673413 | -0.092         | 1.51E-02        | <b>0.147</b>      | <b>5.11E-05</b> | <b>0.199</b>                 | <b>3.12E-09</b> |
| Waist Circumference     | Shungin, D. <i>et al.</i> , 2015     | 25673412 | -0.046         | 2.57E-01        | <b>0.165</b>      | <b>2.96E-05</b> | <b>0.199</b>                 | <b>2.12E-07</b> |
| Waist-Hip Ratio         | Shungin, D. <i>et al.</i> , 2015     | 25673412 | -0.001         | 9.86E-01        | 0.127             | 3.83E-03        | 0.101                        | 1.09E-02        |
| T2D                     | Morris, A.P. <i>et al.</i> , 2012    | 22885922 | 0.140          | 3.98E-02        | 0.113             | 1.27E-01        | 0.049                        | 5.01E-01        |
| HOMA-IR                 | Scott, R.A. <i>et al.</i> , 2012     | 22885924 | 0.090          | 4.29E-01        | <b>0.354</b>      | <b>4.42E-04</b> | 0.253                        | 5.52E-03        |
| Fasting Insulin         | Scott, R.A. <i>et al.</i> , 2012     | 22885924 | 0.040          | 6.09E-01        | <b>0.367</b>      | <b>1.85E-07</b> | 0.231                        | 4.24E-03        |
| Fasting Glucose         | Scott, R.A. <i>et al.</i> , 2012     | 22885924 | 0.000          | 9.97E-01        | <b>0.237</b>      | <b>3.35E-04</b> | 0.036                        | 5.99E-01        |
| Coronary Artery Disease | Nikpay, M. <i>et al.</i> , 2015      | 26343387 | -0.044         | 5.45E-01        | 0.168             | 1.30E-02        | 0.111                        | 1.29E-01        |
| Crohn's Disease         | Franke, A., <i>et al.</i> , 2010     | 21102463 | <b>0.183</b>   | <b>1.87E-03</b> | -0.067            | 1.42E-01        | 0.008                        | 8.84E-01        |
| Rheumatoid Arthritis    | Stahl, E.A., <i>et al.</i> 2010      | 20453842 | 0.011          | 8.71E-01        | -0.041            | 5.27E-01        | -0.037                       | 5.81E-01        |
| Neck BMD                | Rivadeneira, F. <i>et al.</i> , 2009 | 19801982 | 0.120          | 1.78E-02        | -0.113            | 8.53E-03        | 0.030                        | 5.73E-01        |
| Schizophrenia           | PGC <i>et al.</i> 2014               | 25056061 | <b>0.290</b>   | <b>1.90E-13</b> | -0.052            | 2.73E-01        | 0.065                        | 8.90E-02        |
| Bipolar                 | PGC <i>et al.</i> 2011               | 21926972 | 0.213          | 3.29E-03        | -0.066            | 2.49E-01        | 0.052                        | 4.47E-01        |
| Depression              | PGC <i>et al.</i> 2013               | 22472876 | 0.088          | 3.96E-01        | <b>0.344</b>      | <b>5.58E-04</b> | 0.130                        | 1.59E-01        |
| Alzheimer's             | Lambert, J. <i>et al.</i> , 2013     | 24162737 | 0.091          | 4.39E-01        | -0.135            | 1.65E-01        | -0.026                       | 8.07E-01        |
| Autism Spectrum         | Robinson, E.B., <i>et al.</i> , 2016 | 26998691 | -0.015         | 8.76E-01        | 0.056             | 4.77E-01        | 0.019                        | 7.95E-01        |
| Cigarettes per Day      | TAG consortium, <i>et al.</i> , 2010 | 20418890 | -0.176         | 9.84E-02        | 0.313             | 3.29E-03        | 0.146                        | 2.17E-01        |
| Years of Education      | Rietveld, C.A. <i>et al.</i> , 2013  | 23722424 | 0.026          | 6.57E-01        | <b>-0.278</b>     | <b>3.22E-08</b> | -0.028                       | 6.25E-01        |

After Bonferroni correction, p-value cut-off is 0.0025. T2D=type 2 diabetes, BMI=body mass index, BMD=bone mineral density.
